# Supplementary material
Source: MDPI journal article supplement (https://www.mdpi.com/search?q=molbank-2021-M1265)
Supplement: s002 [file molbank-2021-M1265-s002-mod.mol]

4-ClBnCl molfile.mol
  corina  08042112433D 1   1.00000     0.00000 
CORINA 4.3.0 0026  30.10.2019
  9  9  0  0  0  0  0  0  0  0999 V2000
    2.0491    2.5584    1.1937 C   0  0  0  0  0  0  0  0  0  0  0  0
    3.3477    3.0315    1.1845 C   0  0  0  0  0  0  0  0  0  0  0  0
    3.9855    3.2775   -0.0184 C   0  0  0  0  0  0  0  0  0  0  0  0
    3.3249    3.0443   -1.2114 C   0  0  0  0  0  0  0  0  0  0  0  0
    2.0282    2.5659   -1.2010 C   0  0  0  0  0  0  0  0  0  0  0  0
    1.3914    2.3204    0.0012 C   0  0  0  0  0  0  0  0  0  0  0  0
   -0.0224    1.7987    0.0119 C   0  0  0  0  0  0  0  0  0  0  0  0
    5.6140    3.8789   -0.0307 Cl  0  0  0  0  0  0  0  0  0  0  0  0
    0.0021   -0.0041    0.0020 Cl  0  0  0  0  0  0  0  0  0  0  0  0
  1  2  2  0      
  2  3  1  0      
  3  4  2  0      
  4  5  1  0      
  5  6  2  0      
  6  1  1  0      
  6  7  1  0      
  3  8  1  0      
  7  9  1  0      
M  STY  1   1 DAT
M  SLB  1   1   1
M  SDT   1 Text                                                  
M  SDD   1    -0.0485   -3.0695    DA    ALL  1       5
M  SED   1 1
M  END
$$$$
