# Supplementary material
Source: MDPI journal article supplement (https://www.mdpi.com/search?q=molbank-2021-M1265)
Supplement: s002 [file molbank-2021-M1265-s002.inchi]

InChI=1S/C7H6Cl2/c8-5-6-1-3-7(9)4-2-6/h1-4H,5H2
AuxInfo=1/0/N:1,5,2,4,7,6,3,9,8/E:(1,2)(3,4)/rA:9CCCCCCCClCl/rB:d1;s2;d3;s4;s1d5;s6;s3;s7;/rC:-1.3336,.3849,0;-1.3336,-1.155,0;0,-1.9251,0;1.3336,-1.155,0;1.3336,.3849,0;0,1.155,0;0,2.6951,0;0,-3.4652,0;1.3336,3.4652,0;
