# Supplementary material
Source: MDPI journal article supplement (https://www.mdpi.com/search?q=molbank-2021-M1265)
Supplement: s003 [file molbank-2021-M1265-s003.cif]

data_5
_audit_creation_date                               2021-03-19
_audit_creation_method                            'by CrystalStructure 4.3'

_publ_section_references
;
    ENTER OTHER REFERENCES

    Rigaku (2019). CrystalStructure. Version 4.3. 
    Rigaku Corporation, Tokyo, Japan.

    Sheldrick, G. M. (2014). Acta Cryst. (2014). A70, C1437.
    SHELXT Version 2018/2

    Sheldrick, G.M. (2008) SHELXL Version 2018/3, Acta Cryst. A64, 112-122.

    Rigaku Oxford Diffraction (2015), CrysAlisPro. version 1.171.38.41.
    Rigaku Corporation, Tokyo, Japan

;


_chemical_formula_sum                             'C7 H6 Cl2'
_chemical_formula_moiety                          'C7 H6 Cl2'
_chemical_formula_weight                           161.03
_chemical_melting_point                            ?
_chemical_absolute_configuration
                                                 'ad'

#==============================================================================
# CRYSTAL DATA
_space_group_crystal_system                        orthorhombic
_space_group_name_H-M_alt                         'P n a 21'
_space_group_name_Hall                            'P 2c -2n'
_space_group_IT_number                             33
loop_
_space_group_symop_id
_space_group_symop_operation_xyz
1   '+X,+Y,+Z'
2   '-X,-Y,1/2+Z'
3   '1/2-X,1/2+Y,1/2+Z'
4   '1/2+X,1/2-Y,+Z'
#------------------------------------------------------------------------------
_cell_length_a                                     9.1724(14)
_cell_length_b                                     17.714(4)
_cell_length_c                                     4.4440(9)
_cell_angle_alpha                                  90.0000
_cell_angle_beta                                   90.0000
_cell_angle_gamma                                  90.0000
_cell_volume                                       722.1(2)
_cell_formula_units_Z                              4
_cell_measurement_reflns_used                      2018
_cell_measurement_theta_min                        2.32
_cell_measurement_theta_max                        26.97
_cell_measurement_temperature                      173
#------------------------------------------------------------------------------
_exptl_crystal_description                         prism
_exptl_crystal_colour                              colourless
_exptl_crystal_size_max                            0.320
_exptl_crystal_size_mid                            0.170
_exptl_crystal_size_min                            0.090
_exptl_crystal_density_diffrn                      1.481
_exptl_crystal_density_meas                        ?
_exptl_crystal_density_method                     'not measured'
_exptl_crystal_F_000                               328.00
_exptl_absorpt_coefficient_mu                      0.797
_exptl_absorpt_correction_type                     multi-scan
_exptl_absorpt_process_details
;
CrysAlisPro 1.171.38.41 (Rigaku Oxford Diffraction, 2015)
Empirical absorption correction using spherical harmonics,
 implemented in SCALE3 ABSPACK scaling algorithm.
;
_exptl_absorpt_correction_T_min                    0.247
_exptl_absorpt_correction_T_max                    0.931

#==============================================================================
# EXPERIMENTAL DATA

_diffrn_ambient_temperature                        173
_diffrn_radiation_type                            'Mo K\a'
_diffrn_radiation_wavelength                       0.71073
_diffrn_measurement_device_type                   'Rigaku SCX mini'
_diffrn_measurement_method                         \w
_diffrn_detector_area_resol_mean                   13.653
_diffrn_reflns_number                              8279
_diffrn_reflns_av_unetI/netI                       0.0761
_diffrn_reflns_av_R_equivalents                    0.0839
_diffrn_reflns_theta_max                           31.807
_diffrn_reflns_theta_min                           2.299
_diffrn_reflns_theta_full                          25.242
_diffrn_measured_fraction_theta_max                0.982
_diffrn_measured_fraction_theta_full               0.996
_diffrn_reflns_Laue_measured_fraction_max          0.982
_diffrn_reflns_Laue_measured_fraction_full         0.996
_diffrn_reflns_point_group_measured_fraction_max   0.959
_diffrn_reflns_point_group_measured_fraction_full  0.995
_diffrn_reflns_limit_h_min                        -12
_diffrn_reflns_limit_h_max                         12
_diffrn_reflns_limit_k_min                        -25
_diffrn_reflns_limit_k_max                         26
_diffrn_reflns_limit_l_min                        -6
_diffrn_reflns_limit_l_max                         6
_diffrn_standards_number                           0
_diffrn_standards_interval_count                   .
_diffrn_standards_decay_%                          ?
_reflns_number_total                               2377
_reflns_number_gt                                  1547
_reflns_threshold_expression                       F^2^>2.0\s(F^2^)
_reflns_Friedel_coverage          0.756
_reflns_Friedel_fraction_max      0.931
_reflns_Friedel_fraction_full     0.995

#==============================================================================
# REFINEMENT DATA

_refine_special_details
;
    Refinement was performed using all reflections. The weighted 
    R-factor (wR) and goodness of fit (S) are based on F^2^.
    R-factor (gt) are based on F. The threshold expression of
    F^2^ > 2.0 sigma(F^2^) is used only for calculating R-factor (gt).
;
_refine_ls_structure_factor_coef                   Fsqd
_refine_ls_R_factor_all                            0.1195
_refine_ls_R_factor_gt                             0.0734
_refine_ls_wR_factor_ref                           0.2261
_refine_ls_wR_factor_gt                            0.1874
_refine_ls_number_restraints                       1
_refine_ls_hydrogen_treatment                      constr
_refine_ls_number_reflns                           2377
_refine_ls_number_parameters                       82
_refine_ls_goodness_of_fit_ref                     0.983
_refine_ls_weighting_scheme                        calc
_refine_ls_weighting_details
           'w = 1/[\s^2^(Fo^2^)+(0.1319P)^2^+0.2501P] where P=(Fo^2^+2Fc^2^)/3'
_atom_sites_solution_hydrogens                     geom
_atom_sites_solution_primary                       direct
_atom_sites_solution_secondary                     difmap
_refine_ls_shift/su_max                            0.000
_refine_diff_density_max                           0.47
_refine_diff_density_min                          -0.44
_refine_ls_extinction_method                       none
_refine_ls_extinction_coef                         ?
_refine_ls_abs_structure_details
;
 Flack x determined using 472 quotients [(I+)-(I-)]/[(I+)+(I-)]
 (Parsons, Flack and Wagner, Acta Cryst. B69 (2013) 249-259).
;
_refine_ls_abs_structure_Flack                     0.09(12)

loop_
_atom_type_symbol
_atom_type_description
_atom_type_scat_dispersion_real
_atom_type_scat_dispersion_imag
_atom_type_scat_source
  'C' 'C'  0.0033 0.0016 
;
International Tables for Crystallography
(Vol. C, Tables 4.2.6.8 and 6.1.1.4)
;
  'H' 'H'  0.0000 0.0000 
;
International Tables for Crystallography
(Vol. C, Table 6.1.1.4)
;
  'Cl' 'Cl'  0.1484 0.1585 
;
International Tables for Crystallography
(Vol. C, Tables 4.2.6.8 and 6.1.1.4)
;

#==============================================================================
# ATOMIC COORDINATES AND THERMAL PARAMETERS

loop_
 _atom_site_label
 _atom_site_type_symbol
 _atom_site_fract_x
 _atom_site_fract_y
 _atom_site_fract_z
 _atom_site_U_iso_or_equiv
 _atom_site_adp_type
 _atom_site_occupancy
 _atom_site_site_symmetry_order  
 _atom_site_calc_flag
 _atom_site_refinement_flags_posn
 _atom_site_refinement_flags_adp
 _atom_site_refinement_flags_occupancy
 _atom_site_disorder_assembly
 _atom_site_disorder_group
Cl1 Cl -0.08096(16) 0.64231(8) 0.1115(4) 0.0488(5) Uani 1 1 d . . . . .
Cl7 Cl 0.61187(17) 0.60119(10) 0.6675(5) 0.0537(5) Uani 1 1 d . . . . .
C1 C 0.0739(7) 0.6355(3) 0.3298(16) 0.0372(12) Uani 1 1 d . . . . .
C2 C 0.1491(7) 0.7002(3) 0.4128(17) 0.0434(14) Uani 1 1 d . . . . .
H2 H 0.117546 0.748381 0.345079 0.052 Uiso 1 1 calc R U . . .
C3 C 0.2706(7) 0.6937(3) 0.5957(17) 0.0466(14) Uani 1 1 d . . . . .
H3 H 0.321366 0.737860 0.656477 0.056 Uiso 1 1 calc R U . . .
C4 C 0.3191(7) 0.6243(3) 0.6907(17) 0.0454(15) Uani 1 1 d . . . . .
C5 C 0.2421(6) 0.5604(3) 0.6088(17) 0.0424(12) Uani 1 1 d . . . . .
H5 H 0.273671 0.512392 0.678329 0.051 Uiso 1 1 calc R U . . .
C6 C 0.1191(7) 0.5653(4) 0.4260(16) 0.0417(13) Uani 1 1 d . . . . .
H6 H 0.067337 0.521160 0.368704 0.050 Uiso 1 1 calc R U . . .
C7 C 0.4514(9) 0.6181(5) 0.8870(17) 0.0570(18) Uani 1 1 d . . . . .
H7A H 0.437865 0.576234 1.031966 0.068 Uiso 1 1 calc R U . . .
H7B H 0.463562 0.665391 1.002939 0.068 Uiso 1 1 calc R U . . .

loop_
 _atom_site_aniso_label
 _atom_site_aniso_U_11
 _atom_site_aniso_U_22
 _atom_site_aniso_U_33
 _atom_site_aniso_U_23
 _atom_site_aniso_U_13
 _atom_site_aniso_U_12
Cl1 0.0360(7) 0.0546(8) 0.0559(10) -0.0012(8) -0.0063(8) 0.0039(6)
Cl7 0.0387(7) 0.0606(9) 0.0619(11) 0.0049(9) -0.0106(7) 0.0030(6)
C1 0.033(3) 0.041(3) 0.037(3) 0.001(2) 0.005(2) 0.003(2)
C2 0.040(3) 0.035(3) 0.055(4) 0.001(3) 0.002(3) 0.001(2)
C3 0.046(3) 0.046(3) 0.048(3) -0.008(3) -0.002(3) -0.007(2)
C4 0.035(3) 0.057(3) 0.044(4) -0.007(3) 0.003(3) -0.002(2)
C5 0.045(3) 0.043(3) 0.039(3) 0.002(3) 0.004(3) 0.002(2)
C6 0.041(3) 0.039(3) 0.045(3) -0.001(3) 0.003(3) -0.003(2)
C7 0.046(4) 0.088(5) 0.037(4) -0.002(3) -0.009(3) 0.005(4)

#==============================================================================
_computing_data_collection
                                    'CrysAlisPro 1.171.38.41 (Rigaku OD, 2015)'
_computing_cell_refinement
                                    'CrysAlisPro 1.171.38.41 (Rigaku OD, 2015)'
_computing_data_reduction
                                    'CrysAlisPro 1.171.38.41 (Rigaku OD, 2015)'
_computing_structure_solution
                                      'SHELXT Version 2018/2 (Sheldrick, 2014)'
_computing_structure_refinement
                                      'SHELXL Version 2018/3 (Sheldrick, 2008)'
_computing_publication_material
                                          'CrystalStructure 4.3 (Rigaku, 2019)'
_computing_molecular_graphics                     'CrystalStructure 4.3'

#==============================================================================
# MOLECULAR GEOMETRY

_geom_special_details
;
 All esds (except the esd in the dihedral angle between two l.s. planes)
 are estimated using the full covariance matrix.  The cell esds are taken
 into account individually in the estimation of esds in distances, angles
 and torsion angles; correlations between esds in cell parameters are only
 used when they are defined by crystal symmetry.  An approximate (isotropic)
 treatment of cell esds is used for estimating esds involving l.s. planes.
;

loop_
 _geom_bond_atom_site_label_1
 _geom_bond_atom_site_label_2
 _geom_bond_distance
 _geom_bond_site_symmetry_2
 _geom_bond_publ_flag
Cl1 C1 1.724(7) . ?
Cl7 C7 1.791(9) . ?
C1 C2 1.387(9) . ?
C1 C6 1.378(9) . ?
C2 C3 1.385(9) . ?
C2 H2 0.9500 . ?
C3 C4 1.373(9) . ?
C3 H3 0.9500 . ?
C4 C5 1.382(8) . ?
C4 C7 1.499(10) . ?
C5 C6 1.393(9) . ?
C5 H5 0.9500 . ?
C6 H6 0.9500 . ?
C7 H7A 0.9900 . ?
C7 H7B 0.9900 . ?

loop_
 _geom_angle_atom_site_label_1
 _geom_angle_atom_site_label_2
 _geom_angle_atom_site_label_3
 _geom_angle
 _geom_angle_site_symmetry_1
 _geom_angle_site_symmetry_3
 _geom_angle_publ_flag
C2 C1 C6 120.9(6) . . ?
C2 C1 Cl1 120.1(5) . . ?
C6 C1 Cl1 119.0(5) . . ?
C1 C2 C3 119.1(6) . . ?
C1 C2 H2 120.4 . . ?
C3 C2 H2 120.4 . . ?
C4 C3 C2 121.1(6) . . ?
C4 C3 H3 119.5 . . ?
C2 C3 H3 119.5 . . ?
C3 C4 C5 119.1(6) . . ?
C3 C4 C7 120.4(6) . . ?
C5 C4 C7 120.4(6) . . ?
C6 C5 C4 121.0(6) . . ?
C6 C5 H5 119.5 . . ?
C4 C5 H5 119.5 . . ?
C5 C6 C1 118.7(6) . . ?
C5 C6 H6 120.6 . . ?
C1 C6 H6 120.6 . . ?
C4 C7 Cl7 111.1(5) . . ?
C4 C7 H7A 109.4 . . ?
Cl7 C7 H7A 109.4 . . ?
C4 C7 H7B 109.4 . . ?
Cl7 C7 H7B 109.4 . . ?
H7A C7 H7B 108.0 . . ?

loop_
 _geom_torsion_atom_site_label_1
 _geom_torsion_atom_site_label_2
 _geom_torsion_atom_site_label_3
 _geom_torsion_atom_site_label_4
 _geom_torsion
 _geom_torsion_site_symmetry_1
 _geom_torsion_site_symmetry_2
 _geom_torsion_site_symmetry_3
 _geom_torsion_site_symmetry_4
 _geom_torsion_publ_flag
C6 C1 C2 C3 -0.3(10) . . . . ?
Cl1 C1 C2 C3 178.1(5) . . . . ?
C1 C2 C3 C4 1.2(10) . . . . ?
C2 C3 C4 C5 -1.9(12) . . . . ?
C2 C3 C4 C7 179.6(7) . . . . ?
C3 C4 C5 C6 1.7(11) . . . . ?
C7 C4 C5 C6 -179.9(7) . . . . ?
C4 C5 C6 C1 -0.7(10) . . . . ?
C2 C1 C6 C5 0.0(10) . . . . ?
Cl1 C1 C6 C5 -178.3(5) . . . . ?
C3 C4 C7 Cl7 -94.7(8) . . . . ?
C5 C4 C7 Cl7 86.9(8) . . . . ?


#==============================================================================
# Additional structures and associated data_? identifiers
# should be added at this point if there is more than one 
# structure analysis in the CIF.

_shelx_res_file
;
TITL AMAA5
    shelxl.res
    created by SHELXL-2018/3 at 22:44:43 on 19-Mar-2021
CELL  0.71073 9.17240 17.71400 4.44400 90.00000 90.00000 90.00000
ZERR  4 0.00140 0.00400 0.00090 0.00000 0.00000 0.00000
LATT -1
SYMM    -X,    -Y, .50+Z
SYMM .50-X, .50+Y, .50+Z
SYMM .50+X, .50-Y,    +Z
SFAC C H CL
UNIT 28 24 8
L.S. 20
FMAP 2
PLAN 3
WPDB -2
HTAB
BOND $H
CONF
LIST 4
TEMP -100.0
ACTA
SIZE 0.320 0.170 0.090
WGHT    0.131900    0.250100
FVAR       1.27940
CL1   3   -0.080958    0.642313    0.111550    11.00000    0.03602    0.05463 =
         0.05588   -0.00125   -0.00625    0.00387
CL7   3    0.611872    0.601187    0.667495    11.00000    0.03867    0.06060 =
         0.06190    0.00491   -0.01063    0.00303
C1    1    0.073919    0.635503    0.329835    11.00000    0.03281    0.04133 =
         0.03733    0.00069    0.00501    0.00311
C2    1    0.149077    0.700208    0.412837    11.00000    0.04033    0.03541 =
         0.05457    0.00146    0.00205    0.00078
AFIX  43
H2    2    0.117546    0.748381    0.345079    11.00000   -1.20000
AFIX   0
C3    1    0.270648    0.693654    0.595728    11.00000    0.04573    0.04618 =
         0.04803   -0.00768   -0.00173   -0.00747
AFIX  43
H3    2    0.321366    0.737860    0.656477    11.00000   -1.20000
AFIX   0
C4    1    0.319052    0.624291    0.690665    11.00000    0.03523    0.05669 =
         0.04422   -0.00687    0.00278   -0.00192
C5    1    0.242146    0.560410    0.608830    11.00000    0.04475    0.04286 =
         0.03947    0.00211    0.00409    0.00217
AFIX  43
H5    2    0.273671    0.512392    0.678329    11.00000   -1.20000
AFIX   0
C6    1    0.119098    0.565333    0.425989    11.00000    0.04129    0.03909 =
         0.04459   -0.00087    0.00329   -0.00290
AFIX  43
H6    2    0.067337    0.521160    0.368704    11.00000   -1.20000
AFIX   0
C7    1    0.451389    0.618087    0.886994    11.00000    0.04605    0.08773 =
         0.03721   -0.00237   -0.00857    0.00485
AFIX  23
H7A   2    0.437865    0.576234    1.031966    11.00000   -1.20000
H7B   2    0.463562    0.665391    1.002939    11.00000   -1.20000
AFIX   0
HKLF 4


REM  AMAA5
REM wR2 = 0.2261, GooF = S = 0.983, Restrained GooF = 0.983 for all data
REM R1 = 0.0734 for 1547 Fo > 4sig(Fo) and 0.1195 for all 2377 data
REM 82 parameters refined using 1 restraints

END

WGHT      0.0926      0.2175

REM No hydrogen bonds found for HTAB generation

REM Highest difference peak  0.469,  deepest hole -0.442,  1-sigma level  0.093
Q1    1  -0.0769  0.6504  0.3316  11.00000  0.05    0.47
Q2    1   0.6218  0.6653  0.6541  11.00000  0.05    0.45
Q3    1   0.6054  0.6128  0.4491  11.00000  0.05    0.44
;

_shelx_res_checksum   84256

_shelx_hkl_file
;
   1   0   0    1.05    1.91
  -1   0   0   -0.44    1.00
   1   0   0    1.66    1.70
  -1   0   0    2.41    2.03
  -1   0   0    1.45    2.01
   1   0   0    1.82    1.57
   0   2   0   18.49    3.70
   0  -2   0   22.24    3.83
   0   2   0   13.53    2.75
   1  -1   0   24.10    4.60
  -1   1   0   18.84    3.63
   1   1   0   30.74    3.90
  -1  -1   0   31.54    3.64
  -1  -1   0   19.26    2.77
   1   1   0   27.44    3.73
   1  -2   0  725.26   24.48
  -1  -2   0  773.52   21.46
   0   3   0    5.42    3.14
   0   3   0    2.40    3.17
   0  -3   0    8.02    4.27
  -1   3   0 1128.93   32.26
  -1   3   0 1181.99   34.99
  -1   3   0 1132.09   22.95
  -2   0   0  523.21   22.86
   2   0   0  559.12   22.67
   0   0  -1    1.48    3.61
   0   0  -1    2.75    2.64
   0   0   1   11.91    6.55
   2  -1   0  220.46   17.16
  -2   1   0  170.97   14.44
  -2  -1   0  255.41   14.58
  -2  -1   0  157.40   10.98
  -2   1   0  138.11    8.90
   2   1   0  234.54   14.34
   0  -1  -1 1281.34   29.80
   0  -1   1 1258.64   35.75
   0   1   1 1220.34   36.11
   0   1  -1 1355.23   35.97
   0  -1  -1 1367.34   35.13
  -2  -2   0    8.39    3.72
  -2   2   0    8.15    2.46
  -2  -2   0   13.55    4.68
   2   2   0   18.60    5.28
   2  -2   0    8.35    4.91
  -2   2   0    7.99    5.50
   1   0   1    4.12    4.51
   1   0  -1    5.80    4.49
  -1   0  -1    4.86    4.71
  -1   0   1   17.05    9.10
   1   0  -1    1.02    3.45
  -1   4   0  144.39   12.91
  -1   4   0  153.61   13.48
   1   4   0  173.72    7.87
   1   4   0  177.64   14.13
  -1  -4   0  151.58   12.83
   0  -2   1    1.19    2.75
   0   2   1   -0.05    2.99
   0   2  -1    2.00    2.49
   0  -2  -1    2.11    2.49
   0  -2  -1    1.14    2.62
   0   2  -1    0.53    2.04
   1  -1  -1 2172.45   36.83
  -1   1  -1 2245.42   52.54
   1   1  -1 2062.54   43.45
  -1  -1  -1 1944.87   45.50
  -1   1   1 1865.93   45.90
   1   1  -1 1850.15   45.38
   1   1   1 1954.56   49.78
  -1  -1   1 1725.20   38.77
   1  -1  -1 2079.77   49.60
   1  -1   1 1784.28   46.57
   2  -3   0 1665.35   49.77
  -2   3   0 1625.83   32.40
  -2  -3   0 1680.49   41.08
   0   3  -1 2647.89   51.85
   0  -3   1 2699.72   50.33
   0  -3  -1 2506.39   45.03
   0  -3  -1 2886.97   55.72
   0   3  -1 2855.08   60.41
   0   3   1 2672.50   55.88
   0  -5   0    7.23    6.23
   0   5   0    7.52    3.94
   0   5   0   10.66    5.78
   1   3  -1 1142.22   38.17
   1  -3  -1 1235.81   27.40
   1   3   1 1218.96   40.31
  -1   3   1 1095.87   37.83
  -1  -3  -1  998.88   33.57
  -1   3  -1 1160.67   39.24
  -1  -3   1 1030.68   26.86
   1  -3   1 1132.08   39.83
   1   3   1 1214.66   29.48
   1   3  -1 1096.65   38.17
   1  -3  -1 1210.50   40.25
  -1   3  -1  996.33   27.66
  -1   5   0 2727.12   60.13
   1   5   0 2834.20   59.81
  -1   5   0 2632.86   59.45
  -1  -5   0 2715.62   59.21
   1   5   0 2785.19   35.61
   1  -5   0 2560.11   47.46
  -2   4   0 4854.73   97.98
   2  -4   0 4873.76   91.45
   2   4   0 5487.75   54.93
   2   4   0 5642.22   80.48
  -2  -4   0 5388.72   82.18
  -2   4   0 5225.23   64.31
  -2  -1  -1 4307.50   74.39
  -2  -1   1 4188.05   64.61
  -2   1   1 3767.31   69.90
   2   1   1 3716.02   72.96
   2  -1   1 3986.54   41.99
  -2  -1   1 3999.90   63.25
   2  -1   1 3933.67   81.25
  -2   1  -1 4514.30   80.39
   0   4   1   -2.59    4.71
   0   4   1   -6.33    4.89
   0   4  -1   -1.70    4.35
   0   4  -1   -2.16    4.37
   0  -4  -1   -4.32    4.44
   0  -4   1   -1.48    3.23
  -3   0   0    2.78    2.58
  -3   0   0    1.33    3.52
   3   0   0    6.94    4.12
  -3   1   0  353.37   24.58
   3   1   0  456.41   24.92
  -3  -1   0  352.61   19.03
  -3   1   0  296.21   17.01
  -3  -1   0  488.59   25.23
   3  -1   0  441.96   28.10
  -2  -2   1  260.60   18.72
   2   2  -1  250.50   19.99
   2  -2  -1  277.01   21.98
   2  -2  -1  242.32   10.67
  -2  -2  -1  295.13   20.05
   2   2   1  259.15   19.24
  -2  -2   1  303.10   15.90
  -2   2  -1  291.23   21.35
  -2   2   1  240.76   18.67
   2   2   1  253.11   11.56
   1   4   1  158.00   11.79
  -1   4   1  136.70   14.61
   1  -4  -1  148.15   15.29
  -1   4  -1  127.62   11.37
  -1  -4   1  134.17    9.35
   1   4  -1  132.11   13.85
   1  -4  -1  124.48    8.37
  -1   4  -1  157.38   15.77
   1   4   1  155.66   14.45
  -1  -4  -1  139.44   13.03
   0   6   0  293.38   15.78
   0   6   0  341.16   22.58
   0  -6   0  345.02   22.48
  -3   2   0 7199.81   82.45
  -3   2   0 8087.20  125.96
  -1   6   0 4707.06   82.87
  -1  -6   0 4910.12   89.19
   1   6   0 4718.97   83.66
  -1   6   0 4501.34   84.28
   1   6   0 4458.95   50.78
   1  -6   0 4622.60   73.27
  -2   3  -1  518.44   22.37
  -2  -3   1  540.14   29.15
  -2   3  -1  507.36   28.54
  -2   3  -1  522.59   33.06
   2  -3  -1  497.74   29.83
  -2  -3  -1  504.20   26.86
   2  -3  -1  412.87   12.00
   2   3  -1  472.97   28.87
  -2  -3   1  609.65   20.00
   2   3   1  534.09   19.18
   2   3   1  561.56   28.87
   2   5   0 5590.66   89.61
  -2  -5   0 5742.17   92.04
   0  -5   1 4772.86   67.42
   0  -5  -1 4577.89   70.95
   0   5  -1 4606.08   82.74
   0   5   1 4706.64   82.84
   0   5   1 4820.35   80.85
  -3  -3   0  298.75   19.22
  -3   3   0  258.93   24.45
  -3   3   0  271.33   15.36
   3  -3   0  292.87   23.18
   3   3   0  348.44   21.38
   1  -5  -1 1201.28   46.96
   1  -5  -1 1050.39   27.61
   1   5   1 1071.02   38.23
   1   5   1 1070.98   34.59
  -1  -5   1 1009.91   24.53
  -1   5  -1 1164.60   42.83
  -1   5   1 1064.97   42.43
  -1  -5   1 1005.34   40.72
   1   5  -1  985.10   40.52
  -1  -5  -1 1002.91   35.87
  -1   5  -1 1050.29   37.48
  -1   5  -1 1176.26   45.93
  -2   4   1 4982.49   96.43
   2   4   1 5701.95   69.68
  -2  -4  -1 5363.24   88.25
  -2  -4   1 5166.57   99.12
  -2   4  -1 5185.92  105.79
  -2   4  -1 5362.19   81.07
  -2   4  -1 5242.01   91.81
   2  -4  -1 5417.63  102.88
   2   4   1 5791.64   92.02
  -2  -4   1 5606.42   52.81
   0   7   0   -1.59    3.45
   0   7   0   -4.81    5.02
   0  -7   0    2.14    3.89
   3   0  -1    1.48    5.90
  -3   0  -1    2.68    4.12
   3   0   1    4.91    6.92
  -3   0   1   13.90    7.88
  -3   0   1   10.44    4.64
   3   0   1   -1.62    2.31
   3   4   0    8.03    5.15
   3  -4   0    9.28    6.15
  -3   4   0   17.54    8.72
  -3   4   0    4.81    3.56
  -3  -4   0   10.02    5.49
   3  -1   1 1571.53   35.74
  -3   1  -1 1654.13   53.48
  -3   1   1 1465.79   48.87
  -3   1   1 1570.69   38.89
   3   1   1 1452.70   51.48
  -3  -1   1 1605.22   48.56
  -3  -1  -1 1739.51   53.37
   3  -1  -1 1581.89   57.02
  -2  -6   0  180.40   17.65
   2   6   0  135.54    9.02
   2   6   0  178.23   17.54
  -2   6   0  150.56   17.79
  -2   6   0  171.98   20.58
   0   6  -1   -3.30    5.41
   0   6   1   -2.69    4.38
   0  -6  -1   -1.72    4.46
   0   6   1   -4.12    4.76
   0  -6   1   -3.38    3.87
   0   6  -1    1.48    4.55
  -1   7   0 1481.92   51.62
  -1  -7   0 1532.61   52.41
  -1   7   0 1484.62   48.67
   1   7   0 1421.80   48.92
   1   7   0 1401.83   30.78
   1  -7   0 1517.63   45.87
   3   2   1 1461.62   33.40
  -3  -2  -1 1810.38   54.53
  -3   2  -1 1543.05   62.46
   3  -2  -1 1690.94   61.17
  -3   2   1 1492.79   52.26
  -3   2   1 1510.06   31.83
  -3   2  -1 1683.92   54.48
  -3  -2   1 1676.90   52.75
   3   2   1 1650.75   52.58
   3   2  -1 1445.33   54.38
   3  -2   1 1899.90   44.84
  -3  -2   1 1898.42   46.41
  -1   6   1 4415.74   92.37
   1   6   1 4185.61   77.74
  -1   6  -1 4619.63   95.78
  -1   6  -1 4194.69   82.68
   1  -6  -1 4373.29   63.91
  -1   6  -1 4343.24   85.77
  -1  -6   1 4173.91   49.72
  -1  -6   1 4180.07   89.47
  -1  -6  -1 4008.45   75.94
   1   6  -1 4021.55   87.52
   1   6   1 4145.77   75.55
   2   5  -1  389.43   27.39
   2  -5  -1  385.02   12.26
   2   5   1  498.15   28.18
  -2  -5   1  423.42   29.96
  -2   5   1  450.27   30.46
   2   5   1  492.67   23.01
  -2   5  -1  469.70   29.70
  -2  -5  -1  401.36   24.31
  -2   5  -1  457.28   31.99
  -2   5  -1  430.14   25.11
   2  -5  -1  480.93   32.60
   3  -3   1  597.61   28.76
   3   3   1  514.43   28.51
  -3  -3   1  492.22   31.30
  -3   3   1  496.69   31.70
   3   3   1  605.38   24.60
   3  -3  -1  533.74   34.58
  -3   3  -1  508.89   37.45
  -3  -3  -1  598.65   31.37
   3   3  -1  463.35   32.13
  -3   3  -1  529.58   31.26
  -3  -3   1  636.49   25.24
  -3   5   0 1099.67   54.48
   3   5   0 1357.72   45.06
  -3  -5   0 1334.24   47.34
  -3   5   0 1287.08   38.05
   3  -5   0 1194.02   53.46
   3   5   0 1401.19   32.14
   4   0   0 7451.29  119.64
  -4   0   0 7385.71  121.21
   4  -1   0  246.26   23.53
  -4   1   0  196.30   16.70
  -4  -1   0  254.71   20.02
   4   1   0  259.30   23.85
  -4   1   0  226.44   23.21
   0   0  -2 4994.18   97.80
   0   0  -2 5158.35   82.72
   0   0   2 4959.14  104.17
  -4   2   0   23.83    5.87
   4   2   0   26.14    7.72
   4  -2   0   24.42    8.47
  -4  -2   0   19.85    6.09
  -4  -2   0   23.78    5.79
  -4   2   0   25.36    7.95
  -2   7   0  519.57   35.73
   2   7   0  474.90   30.08
   2  -7   0  427.11   21.79
   2   7   0  450.91   16.56
  -2  -7   0  506.55   31.91
  -2   7   0  481.44   31.78
   0  -8   0 1146.04   47.42
   0   8   0 1122.77   47.86
   0  -1  -2    9.71    6.04
   0  -1  -2   25.80   12.93
   0   1   2   12.76   11.97
   0  -1   2 2008.29   63.51
   0   7   1 1897.73   58.09
   0   7   1 1931.16   58.81
   0   7  -1 1773.35   59.00
   0  -7  -1 1758.39   49.12
   3  -4   1   64.49   10.94
  -3   4   1   42.36    9.79
   3  -4  -1   52.22    9.96
  -3  -4  -1   58.49    9.51
   3   4  -1   49.98   10.67
  -3   4  -1   48.92   11.85
   3   4   1   62.58    9.12
  -3   4  -1   46.43    9.69
  -3  -4   1   55.99    6.95
  -3  -4   1   55.57   11.06
   3   4   1   55.59    9.79
  -2   6   1  264.79   24.59
  -2   6  -1  243.35   20.38
   2  -6  -1  289.82   25.78
   2   6   1  242.21   18.12
   2   6  -1  234.98   21.95
   2  -6  -1  194.53    9.33
  -2   6  -1  265.02   25.24
  -2  -6  -1  219.67   18.33
  -2  -6   1  252.42   23.50
  -2   6  -1  281.32   25.05
   2   6   1  257.23   20.12
   1   0  -2   40.85   15.09
  -1   0  -2   26.15   10.81
  -1   0  -2   63.51    8.70
   1   0  -2   67.42   18.84
   1   0   2   98.68   20.13
  -1   0   2   65.91   19.63
   0  -2  -2   88.76   11.51
   0   2  -2   71.69   11.66
   0   2   2   77.32   14.24
   0  -2  -2   78.31   12.31
   0   2  -2   80.25   11.14
   0  -2   2   84.58   13.50
   1   8   0   -1.52    2.70
   1  -8   0    0.33    3.45
  -1   8   0    6.95    5.09
  -1  -8   0    1.21    3.87
   1   8   0    3.09    4.69
  -1   8   0    2.13    4.03
   1  -1  -2  561.67   31.00
   1  -1  -2  743.89   39.25
  -1  -1  -2  667.56   24.09
  -1   1  -2  533.45   34.39
  -1   1   2  572.83   40.09
   1  -1   2  459.25   31.50
  -1  -1  -2  598.59   40.69
  -1   1  -2  474.54   19.06
   1   1  -2  531.05   31.66
  -1  -1   2  503.05   33.32
   1   1  -2  483.36   29.45
   1   1   2  521.19   40.60
  -1   7  -1  482.11   33.59
   1   7   1  465.36   27.85
  -1   7  -1  482.10   29.81
   1   7   1  450.29   27.33
  -1  -7   1  441.38   16.61
  -1   7   1  509.23   33.41
  -1  -7   1  459.10   31.62
  -1   7  -1  448.47   29.86
   1  -7  -1  473.37   23.55
   1   7  -1  438.84   30.28
  -1  -7  -1  416.72   25.38
   4   3   0    8.43    5.08
  -4   3   0   10.61    8.32
   4  -3   0    4.34    5.84
  -4   3   0    3.46    2.82
  -4  -3   0    9.98    6.22
  -4  -3   0    1.66    3.36
   3   6   0 1547.25   35.58
  -3   6   0 1199.23   37.11
  -3  -6   0 1377.00   51.97
   3   6   0 1425.69   49.67
  -3   6   0 1136.58   57.44
   3  -6   0 1199.86   56.78
   1   2   2 1364.07   57.46
   1  -2  -2 1584.33   50.95
  -1  -2  -2 1406.57   50.94
  -1   2  -2 1513.63   38.46
  -1  -2   2 1517.02   54.45
   1  -2   2 1511.05   57.64
  -1  -2  -2 1556.46   38.40
   1  -2  -2 1537.54   53.13
   1   2  -2 1410.20   52.53
   1   2  -2 1634.86   57.98
  -1   2   2 1497.40   60.26
  -1   2  -2 1433.86   56.29
   0  -3   2    0.66    4.04
   0   3   2   -0.73    8.78
   0   3  -2   -4.72    4.69
   0  -3  -2    8.39    8.63
   0  -3  -2    3.01   10.36
   0   3  -2    6.28    3.95
  -3   5  -1  518.37   31.60
   3  -5  -1  564.97   37.86
  -3  -5  -1  556.28   31.15
   3  -5   1  652.05   37.55
   3   5  -1  510.58   34.85
  -3   5  -1  535.08   38.68
  -3   5   1  559.60   37.19
  -3  -5   1  545.70   35.84
  -3  -5   1  546.47   21.22
   3   5   1  632.43   32.63
  -4   0  -1 5866.72  106.32
   4   0   1 5306.30   75.96
   4   0  -1 5423.08  114.11
  -4   0   1 5085.32   86.47
   4   4   0 4303.49   84.39
   4  -4   0 3357.26   91.13
  -4  -4   0 4054.02   83.73
  -4   4   0 3192.98   95.80
  -4   4   0 3268.18   61.12
   1  -3  -2  378.69   24.84
   1   3   2  330.02   28.62
  -1   3  -2  361.80   20.87
   1   3  -2  302.81   25.53
   1  -3   2  355.48   27.97
  -1   3  -2  319.31   26.46
   1  -3  -2  345.12   25.25
  -1  -3   2  399.72   29.50
  -1  -3  -2  322.67   24.70
   1   3  -2  374.74   29.15
  -1  -3  -2  313.57   17.90
  -1   3   2  361.84   30.56
   4  -1   1  195.39   16.25
  -4   1   1  176.80   14.92
  -4  -1  -1  213.53   21.28
  -4   1  -1  194.60   21.71
  -4   1  -1  191.03   25.86
   4  -1  -1  200.24   22.88
  -4  -1   1  215.25   21.27
  -4   1   1  187.95   21.70
  -4  -1   1  223.13   21.67
   4   1   1  163.82   19.54
   4   1   1  137.97   11.94
   4   1  -1  192.11   23.58
   2   0  -2  546.47   32.19
   2   0  -2  624.67   40.82
  -2   0   2  515.18   38.54
   2   0   2  467.99   41.15
   2   8   0 1848.57   35.47
  -2   8   0 2077.81   69.87
   2   8   0 1963.28   63.10
   2  -8   0 1950.60   51.78
  -2  -8   0 2127.67   68.59
  -2   8   0 2258.19   75.59
  -2  -1  -2 1017.77   46.35
  -2   1  -2 1116.99   51.22
   2  -1  -2 1082.37   48.45
   2   1   2 1058.82   50.80
  -2   1   2 1161.29   50.69
   2  -1   2 1086.87   51.13
  -2  -1   2 1165.69   49.81
   2   1  -2 1007.61   41.23
   2  -1  -2 1067.97   39.89
   0  -4  -2 2853.63   66.58
   0   4  -2 2973.48   71.72
   0   4   2 3184.86   90.59
   0  -4  -2 2886.24   68.24
   0   4  -2 2908.60   82.77
   0  -4   2 3174.56   78.39
  -4  -2  -1  107.03   15.02
   4   2  -1   76.83   13.69
   4  -2  -1   87.74   14.79
   4   2   1   78.94    9.11
  -4   2   1   80.70    7.91
  -4   2  -1   86.75   13.75
   4  -2   1  100.69   12.70
  -4  -2   1   86.67   13.01
  -4   2  -1   86.73   16.20
  -4   2   1   96.89   15.52
  -4  -2   1  109.59   14.22
   4   2   1   93.96   14.28
  -2  -7   1  210.50   22.58
   2   7   1  207.02   18.07
  -2   7  -1  251.57   24.91
   2   7   1  201.10   17.83
  -2   7   1  235.94   24.51
   2  -7  -1  211.54   12.41
  -2  -7  -1  172.25   17.18
  -2   7  -1  248.56   25.61
   2   7  -1  180.75   20.76
  -2   7  -1  212.39   20.44
   2  -7  -1  257.64   25.30
   0  -8  -1   -6.04    5.87
   0  -8   1   -3.86    6.83
   0   8   1   -0.58    4.60
   0   8   1   -0.85    5.06
   0   8  -1   -3.51    6.19
   0   9   0   -2.92    3.90
   0   9   0   -9.33    5.88
   0  -9   0   -4.02    5.96
  -2   2  -2   71.40   14.39
   2   2  -2   79.40   17.14
   2   2  -2  116.92   25.85
   2  -2  -2   65.61   10.97
   2  -2   2  135.79   21.33
  -2  -2  -2   84.54   18.05
  -2  -2   2  152.90   24.97
   2  -2  -2   88.34   15.43
  -2   2   2   67.00   14.42
   2   2   2   45.71   12.33
   3   7   0  555.89   33.28
   3  -7   0  528.89   40.07
  -3   7   0  502.40   39.56
   3   7   0  499.13   22.10
  -3  -7   0  564.89   35.25
  -3   7   0  470.25   24.04
   1   4  -2   60.61   11.95
  -1   4   2   61.91   13.07
  -1  -4   2   69.43   12.04
   1   4   2   65.43   13.78
   1  -4   2   58.97   11.26
   1  -4  -2   56.07    8.85
  -1   4  -2   58.22   11.92
  -1  -4  -2   50.68    9.38
   1   4  -2   54.62   11.56
  -1  -4  -2   53.66    7.89
   1  -4  -2   61.34   10.59
  -1   4  -2   57.76    8.79
   1   8   1  124.34   14.47
  -1   8  -1  119.07   18.37
  -1  -8  -1  107.48   13.59
  -1   8  -1  128.71   17.18
  -1   8   1  128.23   16.93
   1  -8  -1  132.35   13.39
  -1  -8   1  117.56   17.64
   1   8  -1  111.81   16.13
  -1   8  -1  135.17   16.55
  -1  -8   1   93.84    7.76
  -1   8   1  134.12   17.30
   1   8   1  106.49   14.36
  -4   3  -1  617.29   44.42
  -4   3  -1  635.94   36.75
   4   3   1  656.65   26.48
  -4  -3  -1  703.77   37.60
  -4   3   1  617.78   39.39
   4  -3  -1  669.21   42.64
  -4  -3   1  616.19   36.87
   4  -3   1  661.47   33.47
   4   3   1  648.27   34.52
  -4   3   1  530.42   19.34
  -4  -3   1  771.84   34.79
   4   3  -1  567.54   37.98
  -4   5   0  679.41   28.22
   4   5   0  794.63   37.06
   4  -5   0  631.57   42.90
  -4   5   0  645.69   46.15
  -4  -5   0  781.83   38.82
  -1   9   0 1933.99   68.43
   1   9   0 1944.37   66.44
  -1   9   0 1976.35   61.99
   1  -9   0 2008.17   61.20
  -1  -9   0 2037.01   67.63
   3   6   1  733.98   35.45
  -3   6  -1  689.95   45.50
  -3   6  -1  701.65   38.29
  -3  -6  -1  632.91   34.26
  -3  -6   1  626.84   40.98
  -3   6   1  685.75   42.81
   3   6  -1  613.36   37.76
   3  -6  -1  751.24   45.43
  -2   3   2  358.19   29.66
   2   3  -2  402.07   32.47
  -2   3  -2  358.12   29.94
  -2  -3  -2  308.60   15.47
  -2  -3  -2  340.09   27.07
   2  -3  -2  373.18   21.55
   2  -3   2  348.28   29.32
  -2  -3   2  383.17   26.08
  -2   3  -2  324.59   15.81
   2   3  -2  313.11   25.90
   2   3   2  347.41   28.88
   2  -3  -2  388.19   29.84
   0  -5  -2   -5.57    4.80
   0   5  -2   -7.82    7.82
   0   5   2   -1.80    6.33
   0  -5   2   -2.97    4.77
   0   5  -2   -4.94    6.06
   0  -5  -2   -6.55    5.37
  -4  -4   1 3162.77   65.60
  -4  -4  -1 3120.82   78.52
  -4  -4   1 2713.91   82.08
  -4   4   1 2839.66   87.55
  -4   4  -1 2879.00   78.49
   4  -4  -1 3036.17   92.04
  -4   4  -1 2722.68   93.04
   4   4  -1 2621.61   83.44
   4  -4   1 3116.30   77.10
   4   4   1 3128.08   74.82
   4   4   1 3508.51   68.19
  -1  -5  -2  266.26   22.59
  -1   5  -2  266.48   26.21
  -1   5  -2  262.08   20.89
  -1  -5  -2  261.87   20.30
   1  -5  -2  262.12   22.80
   1  -5  -2  268.05   19.80
  -1  -5   2  288.89   22.11
   1   5  -2  225.01   23.01
   1   5  -2  260.16   24.07
  -1   5   2  274.69   27.01
   1   5   2  271.71   26.69
   1  -5   2  257.22   23.25
   5   0   0    2.87    3.90
  -5   0   0   -1.45    3.90
  -5   0   0   -3.46    7.14
   5  -1   0  231.89   23.55
  -5   1   0  185.68   18.29
  -5  -1   0  203.01   19.73
  -5  -1   0  234.84   22.58
   5   1   0  244.39   25.12
  -5   1   0  225.87   25.20
   2   4  -2   52.87   11.11
  -2   4  -2   71.52   14.01
  -2   4  -2   55.27    7.53
   2  -4  -2   65.03    9.00
   2  -4  -2   71.29   12.33
   2   4   2   55.66   11.13
   2  -4   2   48.85    9.83
  -2  -4   2   78.25   11.70
  -2   4   2   52.82   11.76
  -2  -4  -2   64.19   13.04
   2   4  -2   76.64   14.85
  -2  -8   1  278.94   27.51
   2   8   1  295.70   24.16
   2   8  -1  269.92   26.04
   2  -8  -1  327.19   17.83
  -2   8  -1  295.39   25.75
   2   8   1  296.45   21.87
  -2   8   1  333.54   30.62
  -2   8  -1  331.03   30.02
  -2   8  -1  330.17   29.79
  -2  -8  -1  255.86   22.06
   2  -8  -1  350.00   31.66
  -4   6   0  688.03   30.39
   4  -6   0  605.18   43.26
   4   6   0  757.39   27.05
  -4   6   0  617.59   45.72
   4   6   0  725.35   36.77
  -4  -6   0  740.37   40.05
   2  -9   0 3459.44   74.16
  -2  -9   0 3634.26   94.46
   2   9   0 3206.33   84.35
  -2   9   0 3991.04  105.06
  -2   9   0 3624.26   96.63
   0   9   1 4064.67   96.88
   0   9  -1 3973.19   69.98
   0   9   1 4366.31   97.73
   0  -9   1 4175.93  101.37
   0   9  -1 4081.38  100.76
   0  -9  -1 3986.04   82.57
  -3   0   2  145.40   28.09
   3   0   2  276.44   34.35
  -3   0  -2  178.07   30.58
   3   0  -2  297.09   38.47
  -5  -2   0   52.82   10.63
  -5   2   0   53.96   10.07
   5   2   0   59.93   13.15
  -5  -2   0   44.92   10.62
   5  -2   0   52.49   13.00
  -5   2   0   39.80   10.72
  -3  -8   0    6.53    6.34
  -3   8   0    5.74    7.92
   3   8   0    5.46    4.21
   3   8   0    3.88    1.97
   3  -8   0    5.91    5.36
   3   1  -2 1376.85   61.96
  -3  -1   2 1432.07   54.05
   3  -1   2 1336.98   62.32
  -3   1  -2 1301.14   57.72
  -3  -1  -2 2873.98   93.87
   3  -1  -2 2761.67   91.80
   3  -1  -2 1390.32   64.25
  -3  -7   1 2644.85   83.39
  -3   7   1 2746.01   88.17
  -3   7  -1 3020.84   87.10
  -3   7  -1 2853.86   95.35
   3  -7  -1 2913.07   93.88
  -3   7  -1 2778.69   78.89
  -3  -7  -1 2789.45   74.35
   3   7   1 2896.97   70.48
   3   7   1 2915.63   71.84
   0  -6   2  110.02   15.16
   0  -6  -2  114.75   13.75
   0   6   2  125.87   19.27
   0  -6  -2  131.36   16.47
   0   6  -2  114.75   17.07
   0   6  -2  128.73   17.04
   0  10   0   21.91    6.07
   0  10   0   21.68    7.19
   0 -10   0   18.14    7.51
   4  -5  -1  117.01   17.36
   4   5  -1  101.93   18.18
   4   5   1  148.25   15.36
   4   5   1  115.22   15.04
  -4  -5   1  101.76   10.52
  -4   5   1  112.47   18.07
  -4   5  -1   95.40   18.46
  -4  -5  -1  118.91   15.09
  -4   5  -1  104.57   15.02
  -4  -5   1  101.84   17.08
   4  -5   1  113.33   15.08
  -1   9  -1  683.45   42.71
  -1  -9   1  607.27   40.07
  -1   9   1  698.43   42.80
  -1   9   1  611.53   38.00
   1   9   1  621.77   34.40
   1   9   1  579.21   35.82
   1   9  -1  560.57   37.40
  -1  -9  -1  566.57   33.28
   1  -9  -1  642.12   31.31
  -1   9  -1  685.41   36.90
   3  -2  -2 9422.83  112.00
   3   2  -2 9999.00  164.79
  -3  -2  -2 9554.57  151.95
   3  -2  -2 9820.73  161.20
  -3   2   2 9876.93  158.19
   3  -2   2 9871.57  169.39
  -3   2  -2 9510.58  158.52
  -5   3   0 1294.88   46.77
   5  -3   0 1253.25   59.35
  -5   3   0 1276.61   66.49
  -5  -3   0 1492.94   56.06
   5   3   0 1559.14   58.24
  -1  -6  -2 1097.58   46.86
   1   6  -2 1011.15   51.68
   1  -6   2  964.31   45.09
  -1   6  -2 1053.31   43.86
  -1   6   2 1040.76   52.96
   1   6   2 1096.40   54.27
  -1  -6   2 1084.30   41.75
  -1   6  -2 1062.73   55.10
   1  -6  -2 1058.99   48.63
   1   6  -2 1057.16   50.89
   1  -6  -2 1033.41   38.87
  -2  -5  -2  841.79   42.90
   2  -5  -2  920.39   34.17
  -2   5  -2  750.42   44.18
   2   5   2  804.91   44.85
   2  -5   2  803.69   46.63
   2   5   2  871.24   37.26
  -2  -5   2  806.54   36.30
  -2   5   2  807.07   47.39
  -2   5  -2  768.27   32.02
   2  -5  -2  798.24   43.31
   2   5  -2  842.78   48.24
   1 -10   0   84.69   14.14
  -1 -10   0   86.31   15.38
   1  10   0   91.86   15.62
  -1  10   0   85.08   13.36
  -1  10   0   79.69   14.25
   1  10   0   78.70    9.12
  -3  -3  -2  639.23   41.36
   3  -3  -2  657.85   44.10
   3  -3   2  675.99   49.19
   3  -3  -2  646.22   29.00
   3  -3   2  471.88   20.71
  -3   3   2  654.55   43.01
   3   3   2  509.78   37.54
  -3   3  -2  696.03   46.84
   3   3   2  556.13   21.86
   4   7   0  316.35   18.34
   4  -7   0  249.19   29.45
  -4   7   0  241.10   30.76
   4   7   0  281.37   24.18
  -4   7   0  269.51   19.75
  -4  -7   0  283.10   26.38
  -5   0  -1    1.34    4.53
   5   0   1    1.64    4.45
  -5   0   1   21.05   11.15
  -5   0  -1    1.01    7.24
  -5   0   1   13.48    6.18
   5   0  -1   16.77   10.34
   5   4   0  747.49   38.90
  -5   4   0  552.12   28.64
  -5   4   0  611.62   47.32
   5  -4   0  572.55   40.62
  -5  -4   0  730.59   40.12
   5  -1   1  800.09   37.64
  -5   1   1  768.55   34.28
  -5   1   1  860.65   49.00
  -5  -1  -1  803.53   44.00
  -5  -1   1  715.52   37.72
   5  -1  -1  763.51   47.59
  -5   1  -1  791.43   44.54
   5   1  -1  786.85   48.71
  -5   1  -1  695.34   46.41
   5   1   1  742.56   32.43
  -4   6  -1  173.24   19.51
  -4  -6   1  184.55   22.49
   4  -6   1  194.45   23.21
  -4  -6  -1  187.30   20.07
   4   6  -1  145.05   20.65
   4  -6  -1  182.99   23.78
  -4  -6   1  161.40   12.04
  -4   6   1  176.96   23.55
  -4   6  -1  160.62   24.25
   4   6   1  250.65   21.78
   4   6   1  201.15   19.56
   2   9  -1  257.04   26.45
  -2   9   1  326.60   31.25
   2  -9  -1  295.01   18.50
  -2  -9  -1  256.63   23.09
  -2  -9   1  277.01   27.99
   2   9   1  302.47   23.60
  -2   9  -1  324.95   32.47
  -2   9  -1  310.08   29.90
   2  -9  -1  312.20   30.49
   2   9   1  288.44   25.78
  -2   9  -1  285.30   27.06
   0  -7  -2   -7.29    7.66
   0  -7  -2  -13.76    9.35
   0   7   2  -11.32   10.31
   0   7  -2   -5.28    5.85
   0   7  -2    2.99    4.35
   0  -7   2   -4.89    5.67
   3  -4  -2  313.67   28.85
   3   4   2  322.25   18.70
  -3   4  -2  311.13   29.96
   3  -4  -2  297.82   16.91
  -3  -4  -2  295.47   27.66
  -3   4   2  325.91   31.50
   3   4   2  246.66   24.59
  -3  -4   2  298.86   28.52
   3  -4   2  327.13   32.26
   3   4  -2  318.67   32.48
  -3  -4   2  294.07   21.87
   5   2   1 2900.07   82.07
  -5  -2   1 3256.80   84.88
  -5  -2   1 2744.12   78.09
  -5   2   1 2901.42   61.46
   5   2   1 2764.11   60.48
  -5  -2  -1 3140.77   84.64
  -5   2  -1 2806.89   95.76
   5   2  -1 2988.59   93.06
   5  -2   1 3132.14   78.90
   5  -2  -1 2914.41   93.50
  -5   2  -1 2991.43   88.52
  -5   2   1 3004.47   92.54
  -3  -8   1  338.26   31.71
   3   8  -1  315.28   29.38
  -3   8  -1  423.51   34.41
  -3   8  -1  372.02   30.37
  -3   8   1  362.63   33.74
   3   8   1  360.39   26.04
  -3  -8  -1  361.51   27.36
   3  -8  -1  388.37   35.85
  -3   8  -1  405.55   37.69
   3   8   1  355.54   25.12
   2   6  -2   74.67   14.52
  -2   6  -2   75.61   10.94
   2  -6   2   87.46   15.22
   2  -6  -2   80.70    9.10
  -2   6   2   84.46   15.08
   2   6   2   66.95   10.16
   2   6   2   81.83   13.98
   2  -6  -2   69.55   12.01
  -2  -6  -2   80.15   13.28
  -2  -6   2   85.25   11.60
  -2   6  -2   73.57   15.02
  -3   9   0  500.86   40.57
   3   9   0  382.85   17.21
   3   9   0  456.46   32.88
   3  -9   0  420.93   24.07
  -3  -9   0  495.02   38.03
  -2  10   0  304.16   30.75
  -2 -10   0  248.49   27.34
   2  10   0  210.69   22.35
   2  10   0  177.31   11.43
   2 -10   0  265.29   21.77
  -2  10   0  272.15   28.02
   0  10   1   -6.31    6.68
   0  10   1   -3.79    4.84
   0 -10   1  -11.95   11.20
   0  10  -1    7.41    5.10
   0 -10  -1   -1.13    3.72
   0  10  -1   -5.03    4.53
   1   7  -2 1236.87   60.87
   1  -7  -2 1377.47   59.23
  -1   7  -2 1267.94   50.74
   1   7   2 1409.95   62.95
   1  -7  -2 1285.49   43.43
  -1  -7   2 1377.47   45.21
  -1   7   2 1324.99   61.23
   1  -7   2 1244.53   52.29
   1   7  -2 1298.33   58.68
  -1  -7  -2 1451.22   56.56
  -1   7  -2 1336.73   63.72
   5  -3   1  346.36   27.60
  -5   3   1  333.38   33.42
  -5  -3   1  378.82   29.09
   5   3   1  332.45   26.96
  -5   3  -1  323.54   29.46
  -5  -3  -1  328.67   28.09
  -5   3   1  287.23   17.66
  -5   3  -1  312.54   34.64
  -5  -3   1  324.60   30.39
   5   3  -1  303.30   32.65
   5  -3  -1  323.63   32.16
   5   3   1  323.73   20.78
  -5  -5   0  644.81   38.43
   5   5   0  644.30   36.11
   5  -5   0  466.04   37.20
  -5   5   0  465.29   24.80
  -5   5   0  512.95   44.90
  -1 -10  -1  501.32   32.75
  -1  10  -1  572.91   41.61
  -1  10   1  577.32   40.01
  -1  10  -1  568.03   35.18
   1 -10  -1  520.75   29.93
  -1 -10   1  484.72   37.84
   1  10   1  493.35   34.83
   1  10   1  527.74   32.96
  -1  10   1  512.24   36.63
   1 -10   1  513.45   36.54
   1  10  -1  439.37   34.35
   0  11   0   -5.93    4.72
   0 -11   0   -3.08    4.67
   0  11   0    2.52    4.94
   3   5   2  266.94   17.60
   3   5   2  253.40   25.01
   3  -5   2  297.66   31.53
  -3   5  -2  248.78   26.64
  -3  -5   2  291.43   28.76
   3  -5  -2  265.21   26.55
  -3  -5  -2  266.65   25.84
   3   5  -2  294.10   31.70
   3  -5  -2  277.90   15.74
  -3  -5   2  258.70   19.06
  -3   5   2  304.47   30.39
  -4   0   2  366.51   30.87
  -4   0  -2  366.83   34.89
   4   0  -2  377.12   37.41
   4   0   2  411.97   37.21
  -4   0   2  453.69   31.07
  -4  -8   0  802.94   47.70
  -4   8   0  689.79   31.11
   4   8   0  838.20   31.73
  -4   8   0  695.50   51.50
   4   8   0  724.15   41.29
   4  -8   0  723.83   52.12
  -4  -1   2  525.20   34.95
  -4   1  -2  406.15   35.24
  -4  -1  -2  400.75   34.07
   4  -1   2  431.73   38.68
   4  -1  -2  462.81   37.45
   4   1   2  392.20   33.82
  -4   1   2  409.23   27.05
  -4  -1   2  439.67   32.36
  -4   1   2  412.19   32.79
  -4  -7   1 1157.38   30.44
   4  -7   1 1690.86   70.95
  -4   7  -1 1482.53   76.32
   4  -7  -1 1496.94   72.20
  -4   7  -1 1421.59   58.32
  -4  -7  -1 1572.30   58.97
   4   7   1 1851.16   60.44
  -4  -7   1 1353.02   63.06
  -4   7   1 1471.45   71.28
   4   7   1 1581.55   54.23
  -1  11   0 2131.05   70.23
  -1  11   0 2125.03   80.35
   1 -11   0 2063.39   69.21
   1  11   0 2055.74   78.48
  -1 -11   0 1992.37   73.42
  -5  -4  -1  186.13   21.61
   5   4   1  200.13   20.33
  -5  -4   1  153.29   17.67
  -5   4   1  183.54   24.62
  -5   4  -1  185.21   21.99
   5  -4  -1  184.05   24.96
  -5   4  -1  156.32   24.03
   5   4   1  204.76   17.16
  -5  -4   1  176.43   22.37
   5   4  -1  183.06   24.27
   5  -4   1  184.49   20.59
  -4   2   2   22.91    6.65
  -4   2   2   37.55   12.93
   4  -2   2   28.93   14.12
   4   2   2   32.55   12.48
   4  -2  -2   20.38   11.32
  -4   2  -2   19.90    9.07
  -2  -7   2 1025.91   35.93
   2   7   2 1072.42   54.76
   2  -7   2 1053.01   53.60
   2   7   2 1027.05   46.16
  -2   7   2 1016.66   56.75
  -2   7  -2  998.71   44.44
   2   7  -2 1001.06   56.00
  -2  -7  -2 1087.25   51.84
   2  -7  -2 1102.67   36.83
  -2  -7   2  984.85   53.26
  -2   7  -2 1023.64   57.44
   2  -7  -2 1039.42   54.06
   0   8  -2  998.63   51.02
   0  -8  -2 1089.34   46.65
   0   8  -2 1030.55   58.81
   0  -8   2 1036.77   43.33
   0   8   2 1096.45   56.69
   0  -8  -2 1062.27   51.60
   5   6   0    1.11    3.67
   5  -6   0    5.54    6.14
   5   6   0    2.71    3.67
  -5   6   0   -5.32    4.66
  -5   6   0   -2.94    6.99
  -5  -6   0   -3.67    4.96
  -3  -9   1  475.55   38.20
  -3   9  -1  617.00   42.93
   3   9   1  499.45   33.04
  -3   9   1  541.38   43.26
  -3   9  -1  506.58   37.50
  -3   9  -1  581.55   46.53
  -3  -9  -1  470.75   32.34
   3  -9  -1  567.28   44.69
   3   9   1  511.24   30.66
   3   9  -1  459.72   35.98
  -2  10  -1  127.89   20.56
  -2 -10  -1   94.25   15.17
   2  10  -1   76.48   15.50
  -2  10   1  111.22   19.60
  -2 -10   1   86.25   16.48
   2  10   1  103.21   14.47
   2  10   1  100.80   15.80
   2 -10  -1  111.56   12.76
  -2  10  -1  106.45   17.58
  -1   8   2  226.81   26.46
   1   8   2  231.79   26.64
   1  -8   2  194.01   21.04
  -1  -8  -2  262.04   24.88
   1   8   2  234.58   23.41
  -1   8  -2  212.96   22.32
   1   8  -2  210.93   24.58
  -1   8  -2  212.59   25.70
   1  -8  -2  195.28   17.01
   1  -8  -2  236.90   25.52
  -1  -8   2  213.10   17.40
   4   3  -2  336.20   33.33
   4  -3  -2  334.36   33.08
   4   3   2  250.87   14.18
  -4  -3   2  318.25   29.68
   4  -3   2  299.98   19.10
  -4   3   2  317.32   31.89
  -4  -3   2  293.40   23.67
  -4   3   2  323.86   20.79
   4   3   2  289.65   30.78
   4  -3   2  332.16   34.86
  -4   3  -2  318.78   30.63
  -3  -6   2  936.43   33.82
   3  -6  -2 1004.01   29.05
   3   6   2  973.66   50.47
  -3   6  -2  988.22   53.42
  -3   6  -2 1008.01   41.04
   3   6   2  986.50   38.51
  -3  -6  -2  991.31   50.47
  -3   6   2 1052.71   58.45
   3   6  -2 1080.67   60.93
  -3  -6   2 1031.41   55.78
   3  -6  -2  967.76   52.84
   3  -6   2 1124.69   63.10
  -3  10   0   17.38    8.65
  -3 -10   0   13.41    6.88
   3  10   0   13.66    7.34
   3 -10   0    8.37    3.46
  -5   5  -1   62.62   16.69
  -5  -5  -1   60.39   13.24
   5   5   1   68.22   11.23
  -5   5  -1   57.29   12.33
  -5   5   1   54.04   13.53
   5   5   1   59.67   11.47
   5  -5   1   47.61    9.83
  -5  -5   1   54.01   12.84
   5  -5  -1   56.51   14.53
  -5  -5   1   45.26    8.54
   5   5  -1   67.33   14.13
   6   0   0 5675.32  129.52
  -6   0   0 5521.54  126.92
  -6   0   0 5374.95  110.65
  -6   1   0 2214.80   85.67
   6   1   0 2540.19   85.28
  -6   1   0 2110.57   70.52
  -6  -1   0 2389.14   77.54
   6  -1   0 2304.15   81.78
  -6  -1   0 2367.91   73.55
  -2  11   0  363.17   33.49
   2  11   0  293.16   27.99
   2 -11   0  336.65   25.80
  -2  11   0  375.06   34.83
  -2 -11   0  328.32   31.86
   0  11   1 1116.36   55.78
   0 -11  -1 1122.13   49.89
   0  11  -1 1156.58   61.34
   0  11  -1 1114.93   40.44
   0  11   1 1242.94   57.65
   0 -11   1 1131.77   58.94
  -6  -2   0   61.49   14.41
  -6   2   0   57.12   18.81
  -6  -2   0   71.33   15.35
   6  -2   0   47.22   14.23
  -6   2   0   43.91   11.14
   6   2   0   65.85   15.35
  -4  -4   2 1344.86   46.89
   4   4   2 1320.27   35.96
  -4  -4   2 1470.18   63.70
   4   4   2 1341.99   60.02
   4  -4   2 1473.34   43.38
   4  -4   2 1631.04   78.43
  -4   4  -2 1509.50   69.23
   4  -4  -2 1532.82   70.94
  -4  -4  -2 1426.82   61.44
   4   4  -2 1566.97   74.17
  -4   4   2 1511.81   70.42
   4   8   1  904.29   43.86
  -4   8  -1  881.24   49.27
  -4  -8   1  712.09   46.66
   4   8   1  828.84   40.74
   4  -8   1  891.54   56.17
  -4   8  -1  830.99   59.55
  -4  -8  -1  962.78   47.71
  -4   8   1  834.75   56.14
   4   8  -1  770.72   47.27
   4  -8  -1  850.99   56.59
  -1  11  -1  789.26   43.07
   1 -11  -1  710.76   37.13
   1  11  -1  642.45   43.01
  -1  11   1  716.25   45.38
   1  11   1  754.10   42.28
  -1  11   1  820.88   49.91
   1 -11   1  733.28   46.25
  -1 -11   1  667.09   46.14
  -1 -11  -1  694.28   41.35
   1  11   1  686.71   43.36
  -1  11  -1  795.09   52.45
  -4  -9   0  439.05   36.57
   4  -9   0  398.87   39.19
  -4   9   0  361.18   37.47
   4   9   0  366.94   30.44
  -5   7   0 1625.12   50.68
   5   7   0 1811.20   47.68
   5  -7   0 1544.47   75.75
  -5  -7   0 1980.70   73.24
   5   7   0 1781.97   62.88
  -5   7   0 1497.98   80.08
  -2  -8   2  132.74   11.74
   2  -8  -2  142.40   13.19
  -2  -8   2  127.09   19.49
   2   8   2  131.73   15.94
   2  -8  -2  135.16   19.66
   2   8   2  139.64   19.72
   2   8  -2  127.91   20.38
  -2   8  -2  161.17   19.51
  -2  -8  -2  149.74   19.44
   2  -8   2  149.96   19.81
  -2   8  -2  133.99   20.89
  -2   8   2  147.38   21.19
   0   0   3  107.62   32.77
   0   0  -3  159.44   27.71
   0   0  -3   47.08   17.19
   6   3   0 1715.68   66.33
  -6   3   0 1432.19   75.19
   6  -3   0 1274.22   62.62
  -6  -3   0 1830.45   65.67
  -6   3   0 1458.54   56.04
  -6  -3   0 1717.40   66.89
   0  -1  -3  732.51   38.28
   0  -1   3  704.06   49.29
   0   1  -3  643.20   43.18
   0  -1  -3  676.17   43.25
   0   1  -3  648.48   35.24
   0   1   3  686.25   49.58
   0 -12   0  586.50   40.84
   0  12   0  569.33   32.21
   0  12   0  640.66   46.89
   0  -9  -2   -6.31    5.21
   0   9   2    3.22    5.85
   0  -9   2   -1.30    5.48
   0   9  -2   -5.48    6.93
   0   9  -2   -8.99    7.74
   5   6  -1 1481.78   67.34
  -5   6  -1 1310.57   75.30
  -5  -6   1 1243.51   41.41
  -5  -6  -1 1451.74   57.56
  -5  -6   1 1198.80   61.11
  -5   6  -1 1259.25   55.13
   5   6   1 1420.58   52.22
   5  -6   1 1357.94   61.37
   5  -6  -1 1352.91   69.39
  -5   6   1 1338.07   70.57
   3   7   2   44.32   11.27
   3   7  -2   55.25   15.09
   3   7   2   49.46    8.22
  -3  -7   2   69.56   15.82
  -3  -7   2   47.99    6.99
  -3   7   2   51.43   13.90
  -3  -7  -2   49.39   10.77
   3  -7  -2   45.65   11.07
  -3   7  -2   38.66    8.52
  -3   7  -2   57.13   12.78
   3  -7   2   80.75   18.29
  -1   0  -3   -8.97    4.72
  -1   0   3   13.34   13.49
   1   0   3   17.98   12.27
  -1   0  -3    6.94    9.69
   1   0  -3   16.22    9.05
   1   0  -3    9.26    8.95
   0   2  -3   37.18   19.95
   0   2  -3    9.64    9.96
   0  -2   3  108.70   27.96
   0   2   3   54.33   26.73
   0  -2  -3   97.05   15.71
   0  -2  -3  119.34   24.92
   1  -1  -3  263.36   35.58
   1   1   3  250.41   45.01
  -1  -1   3  160.60   26.71
   1  -1   3  116.92   22.02
   1  -1  -3  204.32   30.61
   1   1  -3  112.28   19.99
   1   1  -3  106.57   18.63
  -1   1   3  193.95   51.78
  -1   1  -3   55.99    9.86
  -1  -1  -3  150.61   17.85
  -1   1  -3   91.46   18.48
  -1  -1  -3  360.45   40.62
   1  12   0   38.98   12.11
  -1 -12   0   55.73   13.34
  -1  12   0   41.29   12.03
   1  12   0   38.57    6.94
   1 -12   0   71.19   14.62
  -1  12   0   50.18   11.35
   4  -5   2  664.97   52.30
   4   5  -2  618.63   47.94
  -4  -5   2  624.53   44.63
   4  -5  -2  613.53   44.66
  -4  -5  -2  555.40   39.17
  -4   5  -2  602.88   44.32
  -4   5   2  629.03   47.24
   4   5   2  542.82   25.57
  -4  -5   2  569.46   29.48
   4   5   2  486.38   35.60
   4  -5   2  592.99   30.89
   1  -9  -2  228.83   19.95
  -1   9  -2  242.37   29.65
  -1  -9  -2  279.49   26.72
  -1   9  -2  231.97   25.11
   1  -9  -2  240.41   26.47
   1   9  -2  221.36   25.88
  -1   9   2  245.03   27.34
  -1  -9   2  221.60   17.52
   1   9   2  249.77   28.16
   1   9   2  230.46   24.75
   1  -9   2  194.99   21.34
  -3  10   1   98.57   19.37
  -3 -10  -1   77.12   13.88
   3  10   1   82.30   12.21
  -3  10  -1  107.48   21.31
  -3  10  -1   98.47   16.31
   3 -10  -1   99.51   19.13
   3  10  -1   77.81   16.28
  -3  10  -1   72.67   14.85
   3  10   1   67.73   12.60
  -3 -10   1   80.53   17.85
   6   0  -1 1309.48   67.68
  -6   0  -1 1239.85   59.90
  -6   0   1 1248.01   61.51
  -6   0   1 1175.98   52.20
   6   0   1 1251.12   52.75
  -6   0  -1 1234.10   63.63
  -6  -4   0 3168.70   83.42
   6  -4   0 2123.52   84.59
  -6   4   0 2146.21   95.36
  -6   4   0 2253.33   65.72
  -6  -4   0 2871.55   87.35
   6   4   0 2627.84   82.58
   1  -2   3 1353.94   65.60
  -1  -2  -3 1458.16   45.25
   1  -2  -3 1490.51   59.53
  -1  -2  -3 1388.63   61.92
   1   2   3 1391.17   70.46
  -1   2  -3 1364.04   65.06
   1   2  -3 1380.83   63.45
  -1   2  -3 1295.57   41.03
   1  -2  -3 1470.17   60.90
   1   2  -3 1528.14   64.25
  -1  -2   3 1558.90   72.00
  -6   1   1  274.54   23.65
  -6   1  -1  297.11   30.96
   6  -1  -1  301.00   32.60
   6   1  -1  299.48   33.56
  -6  -1  -1  320.53   30.49
  -6   1  -1  278.94   33.67
  -6   1   1  304.61   32.97
  -6  -1   1  309.31   31.03
  -6  -1   1  285.43   27.39
   6  -1   1  322.42   28.89
   6   1   1  277.63   23.96
   2  11   1   58.70   11.12
   2  11   1   62.81   13.55
  -2  11  -1   62.02   14.86
   2  11  -1   52.70   13.10
  -2  11   1   65.62   15.47
  -2  11  -1   55.88   13.59
  -2 -11   1   52.19   13.83
  -2 -11  -1   60.03   13.54
   2 -11  -1   48.14    9.43
   0   3  -3  712.53   47.06
   0  -3  -3  715.50   37.19
   0   3   3  795.47   56.49
   0  -3   3  771.14   49.02
   0  -3  -3  706.62   42.46
   0   3  -3  670.43   36.24
  -6  -2  -1   19.91    9.74
  -6  -2   1   24.92   10.01
  -6   2   1   32.09   13.60
   6   2   1   19.08    7.32
   6   2  -1   21.06   11.64
   6  -2  -1   35.42   14.25
  -6   2  -1   26.15   11.41
   6   2   1   23.39   10.10
   6  -2   1   32.42   10.84
  -6   2   1   20.93    6.27
  -6  -2   1   28.06   10.22
  -6   2  -1   19.44   10.94
  -3 -11   0   30.61   11.42
  -3  11   0   20.02    9.68
   3 -11   0   30.21    7.46
   3  11   0   23.75    9.69
   1   3  -3  167.33   27.87
   1  -3   3  190.98   28.49
   1   3   3  143.67   26.01
  -1  -3  -3  157.05   15.83
  -1   3  -3  152.03   25.56
  -1   3   3  169.72   30.07
   1  -3  -3  179.79   23.06
   1  -3  -3  162.21   21.07
  -1  -3  -3  197.48   24.93
   1   3  -3  146.59   23.86
  -1   3  -3  123.34   15.14
   4   9   1  416.52   29.03
   4  -9   1  435.06   41.41
   4   9  -1  365.23   34.32
  -4   9  -1  433.31   43.84
   4  -9  -1  440.66   41.49
  -4   9  -1  477.88   38.28
  -4   9   1  425.14   42.01
  -4  -9  -1  438.96   34.15
   4   9   1  418.73   31.21
  -4  -9   1  367.69   35.05
  -5   0  -2   -0.73   13.01
   5   0   2   12.69   13.66
   5   0  -2   26.37   15.48
  -5   0   2   22.56   10.66
  -5   0   2    7.20    8.68
  -5   8   0  301.15   36.92
  -5   8   0  306.67   22.26
   5  -8   0  312.05   36.78
  -5  -8   0  412.03   35.65
   5   8   0  375.14   22.79
   5   8   0  389.10   30.67
  -5   1   2  160.17   17.73
  -5   1   2  158.61   22.33
   5   1  -2  185.81   26.72
  -5  -1   2  131.92   19.01
  -5  -1  -2  170.38   24.31
  -5  -1   2  149.86   20.83
  -5   1  -2  170.56   24.09
   5  -1   2  177.29   25.20
   5  -1  -2  175.20   26.48
   5   1   2  152.56   23.67
   2   0  -3 1495.86   62.26
  -2   0   3 1728.54   84.04
   2   0   3 1382.26   67.68
   2   0  -3 1612.00   70.98
  -2   0  -3 1438.13   67.31
   5   7   1  253.49   22.81
   5   7   1  287.15   24.62
  -5   7   1  220.12   29.34
  -5   7  -1  205.55   21.83
  -5  -7   1  180.60   24.49
   5  -7  -1  239.27   30.41
  -5   7  -1  231.27   33.65
  -5  -7  -1  255.16   24.87
   5  -7   1  235.16   26.86
  -5  -7   1  196.74   15.48
   5   7  -1  215.51   27.19
  -2   1   3  323.82   38.30
   2   1  -3  372.12   43.34
   2   1  -3  435.58   42.47
  -2  -1  -3  245.37   27.75
  -2   1  -3  326.08   42.01
   2  -1  -3  255.34   28.88
  -2  -1   3  461.45   56.41
   2  -1   3  408.27   46.72
   2  -1  -3  272.07   27.20
   2 -12   0    1.12    4.12
  -2  12   0    8.25    6.15
   2  12   0   -2.65    7.15
  -2  12   0   10.45    7.71
  -2 -12   0   -2.68    8.80
   0   4  -3   -1.86    5.20
   0  -4  -3   15.02   11.20
   0  -4  -3    6.57    6.94
   0   4   3    6.66    9.13
   0   4  -3    1.68    5.68
   0  -4   3   16.92    9.21
  -6  -3   1    7.88    7.52
  -6   3   1   11.40    6.81
  -6  -3  -1   10.65    8.47
   6   3   1    8.77    5.90
  -6  -3   1    7.29    4.75
   6   3   1    3.11    5.08
   6  -3   1    4.19    4.37
   6  -3  -1    4.34    6.18
  -6   3  -1    7.61    6.76
  -6   3  -1    9.22   10.70
   6   3  -1    0.28    5.94
  -6   3   1    2.80    8.04
  -4   6  -2   77.02   15.82
   4  -6   2   93.72   13.83
  -4   6   2  109.51   20.61
   4  -6   2  101.11   20.59
   4   6  -2  101.83   21.09
   4  -6  -2   96.40   18.01
  -4  -6  -2   89.43   16.03
   4   6   2   73.79   14.36
  -4  -6   2   76.04   15.55
   4   6   2   76.26   10.15
  -4  -6   2   83.32   10.60
  -6  -5   0   23.58    7.59
   6   5   0   27.62    8.56
  -6   5   0   22.98   13.56
   6  -5   0    9.98    8.80
  -6   5   0   19.87    5.97
   2  -9  -2  938.27   55.87
   2  -9  -2  842.66   33.00
   2   9  -2  905.37   55.74
  -2   9  -2 1000.99   60.33
  -2   9  -2  922.04   50.15
   2   9   2  867.45   46.13
   2   9   2  951.91   53.73
  -2  -9  -2  980.89   51.54
   2  -9   2  936.59   52.77
  -2  -9   2  872.99   55.75
  -2   9   2  993.91   60.77
   4  10   0  170.85   21.79
  -4 -10   0  202.36   26.15
  -4  10   0  186.01   28.21
   4 -10   0  190.44   28.99
   4 -10   0  137.70   13.68
   0 -12  -1   -6.16    6.38
   0  12  -1   -2.29    5.58
   0  12  -1   -7.92    9.76
   0 -12   1   -1.89    5.37
   0  12   1    3.28    5.37
   0  12   1   -6.94    9.38
   5  -2  -2   79.02   18.61
   5   2  -2   93.74   22.06
   5   2   2   64.64   18.13
  -5   2   2   74.85   16.89
  -5   2   2   58.85   10.86
   5  -2   2   69.20   16.05
  -5  -2   2   64.16   16.22
  -5  -2  -2  103.39   22.65
  -5  -2   2  118.48   19.34
  -5   2  -2   78.04   16.85
  -3   8  -2  261.96   24.12
  -3   8   2  283.51   32.36
  -3  -8   2  265.81   30.19
   3  -8   2  320.06   35.95
   3   8   2  249.88   26.80
   3   8   2  242.10   21.72
  -3   8  -2  281.75   31.79
   3   8  -2  276.11   32.46
  -3  -8  -2  260.98   26.19
   3  -8  -2  267.21   30.13
   2  -2  -3   26.66   10.74
   2  -2  -3   24.91   10.69
   2   2  -3   36.60   16.36
   2   2  -3   41.37   13.18
  -2  -2  -3   14.22    8.66
   2  -2   3   23.55   14.30
  -2   2   3   15.11    8.77
   2   2   3    8.90    9.02
  -2   2  -3   22.66   12.80
   1  -4  -3  117.71   16.92
   1  -4  -3  115.65   16.75
   1  -4   3  103.90   18.34
  -1  -4   3  125.83   20.15
   1   4  -3   96.08   17.20
  -1   4   3  118.87   24.22
  -1  -4  -3  104.01   15.96
  -1   4  -3   94.63   12.41
   1   4  -3  118.21   18.36
  -1  -4  -3   89.50   11.70
  -1   4  -3  115.55   19.99
   1   4   3   97.99   20.11
   0 -10   2  107.31   13.96
   0 -10  -2  149.70   18.82
   0  10  -2  117.88   19.41
   0  10   2  131.25   20.69
  -1 -12  -1   18.18    7.16
   1 -12   1   16.68    6.58
  -1 -12   1   12.65    6.28
  -1  12   1   12.28    4.50
  -1  12  -1   27.84    9.52
   1 -12  -1   13.17    6.94
   1  12   1   22.03    8.20
  -1  12   1   22.38    9.95
   1  12  -1   21.12   10.20
  -1  12  -1   21.14    9.91
   1  12   1   17.98    9.52
  -5   3   2  316.67   33.29
   5   3  -2  297.82   34.32
   5  -3  -2  306.08   33.13
  -5  -3  -2  310.03   30.22
  -5  -3   2  283.44   24.59
  -5   3  -2  335.61   33.98
   5  -3   2  319.22   35.62
  -5  -3   2  279.86   30.37
   5   3   2  265.53   28.21
  -6  -4  -1  735.53   45.79
   6  -4  -1  698.21   51.14
  -6   4   1  828.94   58.09
   6   4   1  780.54   43.62
   6   4  -1  792.51   53.38
  -6  -4   1  692.78   46.26
   6   4   1  740.05   35.42
   6  -4   1  734.07   44.82
  -6   4  -1  675.98   56.49
  -6  -4   1  766.66   42.71
  -6   4  -1  729.39   46.58
   2   3  -3   33.72   10.98
  -2   3  -3   37.86   11.98
   2  -3  -3   68.69   19.31
   2  -3  -3   69.32   19.05
   2   3  -3   43.61   13.86
  -2   3   3   70.62   25.16
   2   3   3   55.55   24.86
  -2  -3   3   57.62   16.48
   2  -3   3   42.89   14.37
   1 -10  -2  166.83   21.94
  -1 -10   2  148.68   22.63
   1  10   2  157.04   20.77
  -1 -10  -2  195.65   23.20
   1 -10  -2  174.71   18.03
  -1  10  -2  177.19   24.50
  -1 -10   2  153.75   15.16
  -1  10   2  169.62   24.15
  -1  10  -2  198.01   28.53
   1  10  -2  155.26   21.89
   1 -10   2  150.02   17.90
   1  10   2  157.50   23.21
   0  -5   3  363.85   33.16
   0   5  -3  348.20   28.42
   0   5   3  426.24   43.98
   0   5  -3  361.65   35.08
   0  -5  -3  364.47   27.46
   0  -5  -3  381.54   30.35
   0 -13   0   -6.66    7.08
   0  13   0   -3.32    5.40
   0  13   0   -1.08    5.35
  -6   6   0   32.84   15.65
   6  -6   0   15.93   10.09
  -6   6   0   27.18    7.02
   6   6   0   43.86   11.25
  -6  -6   0   46.85   11.86
   6   6   0   30.85    6.78
  -3  11  -1 1619.58   82.09
  -3 -11  -1 1309.48   60.68
  -3 -11   1 1286.48   65.96
  -3  11  -1 1380.45   68.38
   3  11   1 1318.25   62.09
   3  11  -1 1185.65   61.42
   3 -11  -1 1443.97   75.16
  -3  11  -1 1711.11   79.98
   3  11   1 1337.02   52.36
  -1  -5  -3   90.75   12.89
   1  -5  -3   80.31   12.52
   1  -5   3  100.01   18.36
   1   5  -3   85.70   15.54
  -1   5   3  117.31   23.43
  -1  -5  -3   81.67   14.21
  -1   5  -3   94.63   13.84
  -1   5  -3  104.08   19.36
   1   5   3   91.65   19.06
  -1  -5   3   88.12   16.39
   1  -5  -3   90.32   14.87
   1   5  -3   89.93   16.32
  -4   7  -2  162.51   22.27
   4  -7  -2  157.22   22.62
   4   7  -2  161.69   25.26
  -4  -7   2  163.29   24.24
   4   7   2  158.10   20.38
   4  -7   2  213.57   31.95
  -4  -7   2  142.38   12.83
  -4   7   2  196.88   28.06
   4  -7   2  190.90   22.24
  -4  -7  -2  171.22   22.37
   4   7   2  135.79   14.16
  -1 -13   0  623.75   44.81
   1  13   0  657.20   49.43
  -1  13   0  731.57   44.54
   1  13   0  589.18   29.74
   1 -13   0  667.84   42.20
  -1  13   0  707.71   51.66
  -5   4   2  136.39   22.80
   5   4   2   84.52   17.22
   5  -4  -2  124.86   21.32
   5  -4   2  140.57   25.19
  -5  -4   2  139.36   18.26
   5  -4   2  149.15   16.56
  -5  -4  -2  142.79   22.00
  -5  -4   2  168.48   24.83
   5   4   2  118.18   13.36
  -5   4  -2  132.55   21.95
   5   4  -2  148.15   26.11
   5  -8  -1   35.91   12.39
  -5  -8  -1   53.56   12.41
  -5   8   1   43.92   14.71
   5  -8   1   31.92   11.04
   5   8   1   50.61   10.77
   5   8   1   42.57   10.22
  -5  -8   1   38.82   12.51
  -5   8  -1   38.12   10.93
   5   8  -1   46.06   14.12
  -5   8  -1   35.34   13.26
  -2   4  -3 1051.43   59.49
   2  -4  -3 1163.43   57.28
  -2  -4  -3 1027.01   54.39
  -2  -4   3 1302.31   64.13
   2  -4  -3 1178.36   50.88
   2   4  -3 1062.07   57.08
  -2   4   3 1305.51   74.48
   2   4   3 1007.21   60.20
   2   4  -3 1224.93   65.64
   2  -4   3 1121.27   60.84
   5  -9   0  562.06   49.50
  -5  -9   0  699.07   46.48
   5   9   0  569.09   38.29
  -5   9   0  539.17   49.65
   2 -12   1  148.02   21.39
   2  12   1  133.97   20.67
  -2 -12  -1  137.30   20.55
   2  12   1  140.67   17.59
  -2  12  -1  161.46   24.21
  -2  12   1  158.03   24.69
  -2 -12   1  125.74   21.28
   2 -12  -1  132.89   15.88
   2  12  -1  107.43   18.46
  -2  12  -1  152.13   24.10
   6   5   1 1556.44   59.58
   6   5   1 1597.23   53.27
  -6   5   1 1548.86   82.23
   6  -5   1 1411.46   63.49
  -6  -5  -1 1583.95   64.83
  -6  -5   1 1443.37   69.89
  -6  -5   1 1418.40   54.79
  -6   5  -1 1354.41   62.02
   6  -5  -1 1476.32   77.41
  -6   5  -1 1375.95   79.31
  -4  10  -1  209.70   26.54
  -4 -10  -1  198.11   23.31
   4  10  -1  168.31   24.03
  -4  10   1  215.38   31.28
  -4  10  -1  203.79   30.55
  -4 -10   1  154.88   22.54
   4  10   1  151.83   19.49
   4  10   1  170.97   18.39
   4 -10  -1  198.35   28.70
  -3   0   3   22.63   15.90
  -3   0  -3   12.70   14.04
   3   0  -3   26.19   15.47
   3   0   3   21.66   14.92
   3   0  -3   35.54   14.20
  -3   1   3  189.45   33.49
  -3   1  -3  154.78   23.46
   3  -1   3  117.39   21.69
   3  -1  -3  170.92   24.79
   3   1  -3  157.49   24.51
  -3  -1  -3  211.06   30.27
   3   1  -3  157.39   21.15
  -3  -1   3  170.97   26.37
   3   1   3  131.54   29.44
   3  -1  -3  178.06   28.74
  -3  12   0    3.76    8.05
   3  12   0    4.31    6.90
  -3  12   0    0.78    5.78
   3 -12   0    6.21    4.09
  -3 -12   0    0.31    5.82
  -3   9  -2  205.65   23.02
  -3  -9   2  203.70   26.98
  -3   9   2  267.51   32.86
   3   9   2  192.87   20.71
   3   9  -2  222.06   30.13
  -3  -9  -2  193.82   23.06
   3  -9   2  290.57   34.98
  -3   9  -2  207.97   28.04
   3   9   2  238.44   27.79
   3  -9  -2  222.49   28.23
  -2  10   2   59.36   12.28
  -2  10  -2   68.39   14.30
   2  10   2   54.76   12.59
  -2 -10   2   53.68   12.70
  -2  10  -2   60.38   15.32
  -2 -10  -2   65.07   13.67
   2 -10  -2   71.52   15.55
   2 -10   2   69.68   15.26
   2  10  -2   52.89   13.97
   2 -10  -2   52.12    8.01
   2  10   2   71.82   16.07
   0   6  -3   -5.91    9.55
   0  -6   3    5.68    6.48
   0  -6  -3   -8.23    6.57
   0   6  -3   -3.31    6.82
   0  -6  -3  -11.06    6.84
   0   6   3   -0.02   11.08
   3   2   3  434.04   43.02
  -3  -2   3  530.29   42.81
   3  -2   3  464.60   43.44
  -3   2   3  501.58   46.56
  -3  -2  -3  529.61   42.88
   3   2  -3  491.33   43.38
   3   2  -3  474.85   38.14
   3  -2  -3  469.79   40.07
  -3   2  -3  444.24   40.11
   3  -2  -3  471.34   33.95
   4 -11   0  200.55   30.07
  -4  11   0  186.32   28.06
   4 -11   0  145.37   14.81
   4  11   0  153.78   20.82
  -4 -11   0  228.74   28.57
   5  -5   2  412.66   26.91
   5  -5   2  489.62   47.63
  -5  -5   2  376.52   26.34
   5  -5  -2  410.20   38.55
  -5  -5  -2  417.12   36.34
   5   5  -2  408.91   40.93
  -5   5  -2  439.44   39.68
   5   5   2  349.43   32.04
  -5   5   2  454.46   43.03
  -5  -5   2  399.35   36.43
   5   5   2  349.60   22.04
  -1  -6  -3  173.98   18.24
   1   6  -3  182.91   23.28
  -1   6   3  237.00   33.52
  -1  -6   3  195.54   23.07
   1  -6   3  163.96   21.95
   1  -6  -3  196.32   21.27
   1   6  -3  176.38   23.77
   1   6   3  190.74   28.79
  -1  -6  -3  196.09   22.90
   1  -6  -3  206.25   22.84
  -1   6  -3  171.64   19.32
  -1   6  -3  199.51   26.57
  -7   0   0   -5.44    5.13
  -7   0   0    8.49    6.86
   7   0   0   -0.46    5.41
  -2  -5  -3   21.84    9.62
   2   5  -3   26.98   14.15
   2  -5   3   27.99   11.18
  -2   5   3   16.10   10.45
  -2   5  -3   19.44   11.01
   2   5  -3   24.20   13.58
   2  -5  -3   13.19    7.31
   2  -5  -3    9.06    5.92
  -2  -5   3   40.74   12.92
   2   5   3   19.23    7.21
   6   7   0  586.55   38.46
  -6  -7   0  678.23   46.46
  -6   7   0  497.62   50.45
   6  -7   0  432.97   41.77
   6   7   0  590.06   30.05
   7  -1   0  315.35   35.24
  -7  -1   0  360.69   33.20
  -7   1   0  343.73   31.76
  -7  -1   0  368.39   33.37
   7   1   0  357.88   35.99
  -7   1   0  339.77   37.35
   2  13   0  558.26   44.31
  -2 -13   0  600.96   45.04
  -2  13   0  638.00   44.60
  -2  13   0  677.14   51.54
   2 -13   0  612.00   38.29
   0 -11  -2   -0.39    4.79
   0  11   2   -0.94    6.67
   0  11  -2    5.10    6.58
   0 -11   2   -6.02    4.71
   0  13   1 1118.75   58.72
   0 -13   1  994.00   58.84
   0 -13  -1  991.91   52.13
   0  13  -1 1019.45   64.52
   0  13   1  941.32   58.04
   0  13  -1  974.22   41.88
   3   3  -3  527.88   47.02
   3  -3   3  463.88   42.65
  -3  -3   3  543.51   43.77
  -3   3  -3  436.60   40.33
  -3   3   3  510.01   45.77
   3  -3  -3  455.16   37.91
   3  -3  -3  498.16   33.58
  -3  -3  -3  457.80   38.27
   3   3  -3  484.27   39.74
  -6   6  -1  262.28   26.32
  -6   6  -1  284.96   38.00
   6   6   1  314.63   24.99
   6   6  -1  340.40   36.06
  -6  -6   1  272.60   22.89
   6   6   1  304.16   25.85
   6  -6   1  245.78   26.79
  -6  -6   1  278.46   31.86
  -6   6   1  308.82   39.24
  -6  -6  -1  301.60   28.76
   6  -6  -1  292.21   34.57
  -7  -2   0 1803.85   75.91
  -7   2   0 1682.71   68.79
  -7  -2   0 1917.32   74.15
   7  -2   0 1409.82   72.12
  -7   2   0 1632.88   81.92
   7   2   0 1959.26   80.46
   4  -8  -2 1136.21   64.56
  -4  -8  -2 1041.34   54.64
  -4   8  -2 1136.50   63.61
   4   8   2  994.05   45.44
   4   8   2  999.82   52.89
   4   8  -2 1125.10   67.92
  -4  -8   2 1027.08   60.75
  -1 -11  -2  701.87   44.94
   1  11   2  643.41   46.09
   1 -11  -2  593.17   44.12
   1  11   2  594.57   41.45
   1 -11  -2  635.59   36.17
  -1  11  -2  652.88   48.69
  -1  11  -2  726.58   57.80
   1  11  -2  534.39   42.85
   1 -11   2  536.40   34.88
  -1  11   2  671.15   51.03
  -1 -11   2  650.75   51.46
  -1  13   1   16.89    9.43
   1  13  -1   23.76   11.04
   1 -13  -1   27.63    9.50
   1  13   1   27.90   10.34
  -1 -13   1   13.15    8.62
  -1  13  -1   25.02   13.39
  -1 -13  -1   19.46    6.57
   1  13   1   10.54    8.64
  -1  13  -1   34.04   11.83
   1 -13   1   31.83   12.72
  -1  13   1   27.27    8.81
  -5  -9   1   15.60    9.53
   5  -9   1   28.39   12.14
  -5   9   1   26.46   12.50
   5   9  -1   12.16    6.69
   5   9   1   14.12    6.12
   5  -9  -1   18.33   11.49
  -5  -9  -1   23.45    9.17
  -5   9  -1   17.00    8.18
  -5   9  -1   19.28   13.73
   5   9   1   21.70    8.60
  -7   3   0  425.72   45.04
   7   3   0  545.70   42.51
  -7   3   0  464.05   35.49
  -7  -3   0  522.62   40.18
  -7  -3   0  549.57   39.51
   0  -7  -3  405.30   30.98
   0   7   3  498.23   48.64
   0  -7   3  392.37   32.93
   0  -7  -3  418.35   32.29
   0   7  -3  393.91   37.69
   0   7  -3  402.26   33.31
   3  -4   3   40.14   12.99
   3   4  -3   52.99   19.97
  -3   4  -3   46.40   14.68
  -3   4   3   55.04   15.31
   3   4   3   37.92   14.40
   3  -4  -3   51.52   13.81
  -3  -4  -3   47.44   15.35
   3  -4  -3   59.04   12.04
  -5  -6  -2  834.66   49.84
   5   6   2  761.04   46.17
   5  -6   2  857.89   42.07
  -5  -6   2  837.18   38.55
  -5  -6   2  851.91   54.29
   5   6   2  794.53   35.43
   5  -6  -2  881.90   58.06
  -5   6  -2  880.52   54.77
   5   6  -2  889.47   60.52
   5 -10   0   -0.08   10.82
  -5  10   0   -4.37    9.97
   5  10   0    9.99    7.43
  -5 -10   0    5.60    6.66
   3 -12  -1  234.60   31.54
   3  12   1  221.63   26.82
  -3 -12   1  184.05   25.37
   3  12  -1  185.52   25.41
  -3 -12  -1  241.81   28.99
  -3  12  -1  294.10   36.08
  -3  12   1  266.43   33.94
  -3  12  -1  238.40   29.36
   3  12   1  234.52   22.68
   2  -6   3  200.29   26.41
   2   6  -3  207.35   28.16
  -2  -6  -3  167.68   16.45
  -2   6  -3  206.20   28.42
  -2   6  -3  158.81   16.32
   2  -6  -3  212.93   21.16
   2   6   3  184.89   27.10
   2  -6  -3  195.52   23.87
  -2  -6   3  210.65   24.48
  -2   6   3  220.23   31.60
   2   6  -3  200.88   27.16
  -2  -6  -3  208.75   25.03
  -1  -7  -3  195.57   20.54
   1   7   3  226.24   32.31
  -1  -7   3  204.06   23.03
  -1   7   3  259.47   35.22
   1  -7  -3  200.23   21.29
  -1  -7  -3  198.02   23.49
  -1   7  -3  169.41   19.60
   1   7  -3  198.02   27.13
  -1   7  -3  202.96   28.22
   1  -7  -3  201.18   23.23
   1   7  -3  202.10   25.68
   1  -7   3  193.79   24.10
   0 -14   0  217.63   25.41
   0  14   0  248.58   24.50
   0  14   0  261.63   33.54
  -4  11   1  368.05   41.32
  -4  11  -1  353.56   41.96
  -4 -11  -1  334.55   32.55
  -4 -11   1  285.83   31.45
   4  11   1  301.50   25.23
   4  11  -1  263.79   30.34
   4  11   1  262.94   27.05
   4 -11  -1  348.03   39.00
  -4  11  -1  358.77   36.13
  -3  10  -2  140.40   20.34
   3  10   2  122.08   18.20
  -3 -10  -2  140.70   20.21
  -3  10  -2  146.49   24.79
   3  10   2  147.66   22.05
   3 -10  -2  140.53   22.39
   3  10  -2  127.45   22.38
  -3 -10   2  114.69   20.66
  -3  10   2  162.04   26.32
   6   0  -2 1161.67   70.72
   6   0   2 1020.44   62.21
  -6   0   2 1079.55   57.70
  -6   0  -2 1155.83   66.05
  -6   0   2 1096.91   51.13
   6   8   0  296.12   21.94
   6   8   0  301.42   27.89
  -6   8   0  280.38   40.77
   6  -8   0  233.21   32.79
  -6  -8   0  337.15   34.11
  -7   0   1  -15.64   10.55
   7   0   1    5.97    8.82
  -7   0  -1    4.00    8.52
   7   0  -1   12.86   11.43
  -7   0  -1   -6.74    7.67
  -7   0   1   -2.44    5.97
   7  -4   0   15.79   11.83
  -7   4   0    7.95    7.25
  -7   4   0   14.83    7.13
  -7  -4   0   21.87   10.24
  -7  -4   0    2.17    5.34
   7   4   0   20.70   11.25
  -6   1   2  145.10   23.67
   6  -1   2  132.44   27.65
   6   1   2   81.65   18.04
   6  -1  -2  114.83   23.49
  -6  -1   2  281.20   33.39
  -6  -1   2  310.74   37.23
  -6  -1  -2  124.81   23.05
  -6   1  -2  153.39   36.30
  -6   1   2   96.60   14.75
  -6  -7   1    2.68    7.91
  -6   7   1    9.83    8.68
   6   7  -1    5.60    9.15
  -6  -7  -1    0.05    4.92
   6  -7   1   -1.74    9.11
  -6   7  -1    1.96    8.61
   6   7   1    4.26    8.27
   6  -7  -1   -0.66    7.38
  -6  -7   1    3.61    5.82
  -6   7  -1   -0.90    5.38
   6   7   1    3.89    7.12
  -2  11  -2  346.03   35.11
   2  11   2  309.49   29.73
   2  11   2  345.31   34.74
   2 -11  -2  329.37   34.30
  -2 -11  -2  367.22   33.26
  -2  11  -2  364.32   41.66
   2  11  -2  300.56   33.58
  -2 -11   2  345.45   38.18
   2 -11   2  323.23   33.20
   2 -11  -2  266.74   19.37
  -2  11   2  378.29   39.93
  -7  -1   1  334.18   32.82
  -7  -1   1  342.08   32.58
  -7   1   1  354.04   29.36
   7   1   1  359.68   31.20
  -7  -1  -1  349.89   35.22
  -7   1  -1  313.81   35.88
   7  -1   1  414.18   36.53
   7   1  -1  377.33   40.03
  -7   1   1  359.59   35.97
   7  -1  -1  315.88   36.41
  -7   1  -1  367.01   36.58
  -1  14   0  856.07   49.25
   1  14   0  790.10   55.80
  -1 -14   0  783.74   51.55
  -1  14   0  883.33   61.15
   1 -14   0  785.97   46.74
   2  13   1  433.21   39.58
   2 -13   1  434.61   38.24
  -2  13  -1  467.47   44.94
  -2 -13  -1  439.02   38.92
  -2  13   1  509.60   45.55
   2  13  -1  366.70   35.24
  -2  13  -1  505.09   44.13
   2 -13  -1  426.35   29.50
  -2 -13   1  393.30   38.98
   2  13   1  433.31   32.39
   3  -5  -3  366.93   34.31
  -3   5   3  420.70   42.70
   3   5  -3  408.41   42.01
   3  -5   3  371.74   37.59
  -3   5  -3  342.60   34.47
   3   5   3  307.69   32.95
  -3  -5   3  399.14   33.49
   3  -5  -3  402.01   28.01
  -3  -5  -3  372.93   35.82
  -6   2   2   31.64   12.14
  -6  -2  -2   25.21   14.52
  -6  -2   2   24.57   11.14
   6  -2  -2   14.90   10.25
   6   2   2   17.81   12.45
  -6  -2   2   56.47   13.05
   6  -2   2   25.52   13.99
   6   2  -2   34.45   15.12
  -6   2  -2   23.32   13.67
  -3 -13   0   24.12   11.58
  -3  13   0   15.54    9.11
  -3  13   0   23.49   11.00
   3  13   0   19.24    8.44
   3 -13   0   19.63    7.96
  -7   2  -1  487.20   46.45
  -7   2   1  567.08   35.81
  -7   2  -1  586.60   46.54
  -7  -2  -1  557.45   43.63
   7   2  -1  589.89   48.77
   7  -2  -1  512.97   45.74
  -7  -2   1  525.81   41.68
   7   2   1  531.00   36.47
   7  -2   1  612.05   45.54
  -7  -2   1  582.48   44.15
  -7   2   1  552.94   46.10
   4   0   3 1131.30   72.66
  -4   0   3 1339.85   72.09
  -4   0  -3 1126.61   64.25
   4   0  -3 1233.60   71.30
   4  -1  -3  548.27   46.92
   4   1   3  458.76   43.63
   4   1  -3  685.04   57.02
  -4  -1  -3  543.13   44.49
  -4   1   3  609.61   50.56
  -4   1  -3  593.43   50.25
   4  -1   3  646.68   62.78
   4 -12   0    2.19   10.19
  -4  12   0    2.20    8.01
   4  12   0    2.67    4.80
  -4 -12   0   -0.88    5.63
   4 -12   0   -1.83    4.81
   4   9  -2  775.20   57.95
  -4  -9  -2  731.78   46.36
  -4   9  -2  833.68   57.00
   4  -9  -2  820.90   56.73
  -4  -9   2  715.05   51.97
   4   9   2  767.71   47.95
   4   9   2  747.23   42.42
  -5   7  -2  646.56   47.14
   5   7   2  608.53   33.77
   5  -7   2  708.06   41.49
   5   7   2  564.40   39.09
  -5  -7   2  659.61   49.32
  -5   7   2  773.75   58.78
  -5  -7  -2  632.03   43.41
   5   7  -2  710.60   56.07
   5  -7  -2  730.47   54.20
  -4  -2   3  214.15   29.70
   4   2  -3  178.01   33.37
   4  -2  -3  139.80   25.23
  -4   2  -3  147.77   29.04
  -4  -2  -3  182.98   28.70
   4   2   3  158.09   29.19
   4  -2   3  162.51   32.50
  -4   2   3  159.84   29.46
  -6   3  -2  166.15   26.00
   6  -3  -2  156.42   25.28
   6   3   2  134.40   21.73
   6  -3   2  185.29   29.33
  -6  -3  -2  167.90   25.47
   6   3  -2  146.48   26.74
  -6  -3   2  145.44   19.66
  -6   3   2  167.53   25.85
  -6  -3   2  159.63   22.17
  -2  -7  -3   50.67    9.40
  -2   7  -3   48.93    9.67
   2  -7  -3   72.78   12.76
   2  -7  -3   62.52   14.11
  -2  -7   3   79.87   14.49
  -2   7   3   87.52   20.37
   2   7   3   61.93   15.21
  -2  -7  -3   68.12   13.45
   2   7  -3   75.23   16.69
   2   7  -3   69.51   16.27
   2  -7   3   56.10   14.13
  -2   7  -3   64.95   16.29
   0   8  -3  -14.28   10.64
   0   8  -3    2.92    6.77
   0  -8   3    0.71    4.74
   0   8   3   -7.36   10.03
   0  -8  -3  -18.27   10.46
   0  -8  -3  -10.72    9.78
   0 -12   2    2.85    3.68
   0  12   2   22.99   10.86
   0 -12  -2   15.79    8.73
   0  12  -2    7.07    6.71
   0 -12   2    7.98   10.70
   7  -3   1   46.46   14.29
   7   3   1   42.73   10.84
  -7  -3   1   60.94   15.99
  -7   3  -1   41.83   15.86
   7   3  -1   61.60   21.51
  -7   3  -1   44.11   13.84
  -7  -3  -1   45.44   13.95
   7  -3  -1   45.50   15.62
  -7  -3   1   33.46   13.56
  -7   3   1   31.50   11.80
   7   3   1   33.51   11.76
  -7   5   0  323.68   25.85
   7  -5   0  305.12   35.70
  -7  -5   0  529.71   43.33
   7   5   0  468.61   37.62
  -7   5   0  372.12   44.32
   5 -10   1  108.22   21.19
  -5  10   1   87.82   22.43
   5  10   1   61.21   11.63
   5  10   1   67.22   13.36
  -5  10  -1   83.79   17.79
  -5  10  -1   79.68   20.24
   5 -10  -1   72.03   17.92
  -5 -10  -1   88.13   17.93
  -5 -10   1   64.44   16.46
   5  10  -1   51.74   14.04
  -1   8  -3  142.54   23.91
   1   8   3  165.08   29.79
   1  -8  -3  160.15   22.41
   1  -8  -3  136.55   17.59
  -1   8  -3  128.26   18.23
  -1  -8   3  120.30   17.06
   1  -8   3  108.61   17.74
  -1  -8  -3  152.96   20.77
  -1  -8  -3  156.52   22.40
   1   8  -3  144.41   23.02
  -1   8   3  157.93   27.39
   1   8  -3  135.57   23.81
   2  14   0   49.39   14.22
  -2 -14   0   34.61   11.07
   2 -14   0   48.76   12.53
  -2  14   0   63.25   15.07
  -2  14   0   68.14   18.66
   1 -12  -2   36.48   11.37
  -1 -12  -2   37.40   10.03
  -1  12  -2   44.97   13.30
   1 -12  -2   44.20   10.64
   1  12  -2   51.01   13.96
   1 -12   2   31.89    9.25
   1  12   2   40.68   11.95
   1  12   2   44.67   13.77
  -1 -12   2   52.74   13.68
  -1  12   2   41.29   13.24
   4  -3   3  304.28   37.98
  -4   3  -3  283.89   33.56
   4   3   3  279.09   36.07
  -4  -3   3  374.43   34.83
  -4   3   3  345.32   40.16
  -4  -3   3  358.24   37.36
   4   3  -3  316.39   37.84
   4  -3  -3  296.31   33.56
  -4  -3  -3  409.63   41.40
   0  14   1    1.43    6.72
   0  14  -1   -6.14   10.07
   0  14   1   -0.84    6.40
   0 -14  -1  -15.21    9.15
  -3   6  -3  357.76   37.41
   3  -6  -3  380.28   26.74
  -3   6   3  417.92   44.15
   3   6   3  307.33   33.96
  -3  -6  -3  327.45   35.36
  -3  -6   3  365.36   30.17
   3  -6   3  365.40   37.66
   3  -6  -3  340.19   34.17
   3   6  -3  401.25   42.78
   6   4  -2  232.78   32.79
   6  -4   2  276.01   38.07
  -6  -4   2  252.93   25.97
   6   4   2  180.55   23.28
  -6   4   2  230.28   30.34
  -6  -4   2  258.16   30.36
   6  -4  -2  239.57   31.16
  -6   4  -2  256.80   32.14
  -6  -4  -2  202.60   25.97
   6   8   1  436.72   33.02
   6  -8  -1  372.02   41.05
   6  -8   1  323.90   34.01
  -6   8   1  386.50   46.91
  -6   8  -1  284.39   27.24
   6   8   1  395.93   30.32
  -6  -8  -1  429.30   36.01
  -6   8  -1  384.21   47.27
   6   8  -1  351.49   36.08
  -6  -8   1  314.70   34.74
  -5 -11   0 1675.52   79.52
   5 -11   0 1643.57   90.13
  -5  11   0 1358.27   80.01
   5  11   0 1283.63   62.07
   7   4  -1  434.87   41.65
   7  -4  -1  321.33   36.89
  -7   4  -1  357.33   44.32
   7   4   1  374.12   27.73
  -7   4  -1  379.19   36.49
  -7   4   1  372.41   39.97
  -7  -4   1  354.66   32.84
   7  -4   1  370.60   35.10
   7   4   1  357.20   31.94
  -7  -4   1  368.90   36.83
  -7  -4  -1  426.68   36.59
   6   9   0  317.51   30.05
  -6  -9   0  365.57   37.45
   6  -9   0  263.79   36.43
  -6   9   0  268.20   39.68
  -1  14   1  105.89   20.22
   1  14   1  111.51   18.48
   1  14  -1  108.94   21.39
   1  14   1  102.19   20.14
  -1 -14   1   97.58   19.35
  -1  14   1  116.23   21.05
  -1  14  -1  124.53   20.30
   1 -14   1   95.59   18.74
  -1  14  -1  119.01   24.65
  -1 -14  -1  118.84   21.29
   1 -14  -1  125.01   18.65
   3 -11  -2   35.60   10.71
  -3 -11   2   20.58    9.02
   3  11   2   47.15   13.72
  -3  11   2   54.08   16.99
   3  11  -2   26.26   11.90
   3  11   2   19.35    5.46
  -3 -11  -2   50.85   14.10
  -3  11  -2   47.15   14.17
  -3  11  -2   56.11   17.40
   3  13   1  489.40   33.55
  -3 -13  -1  539.53   43.25
   3  13   1  506.14   43.09
   3  13  -1  447.76   40.46
  -3  13  -1  538.69   47.20
  -3 -13   1  463.42   42.52
   3 -13  -1  561.38   49.11
   3 -13   1  510.15   39.94
  -3  13   1  635.23   53.93
   4   4  -3  719.90   57.50
  -4   4  -3  631.82   50.37
  -4   4   3  714.05   57.37
  -4  -4   3  720.56   47.69
  -4  -4   3  709.93   53.16
   4  -4   3  621.47   53.05
  -4  -4  -3  608.08   48.41
   4  -4  -3  607.31   46.40
   4   4   3  527.18   43.90
   7  -6   0 1527.43   80.27
  -7  -6   0 2502.90   93.78
   7   6   0 2130.23   79.44
  -7   6   0 1720.64   97.46
   4  12   1    7.34    7.70
  -4  12  -1   46.32   15.81
   4  12   1   18.45    7.34
  -4 -12  -1   24.02   10.03
   4 -12  -1   33.47   13.26
  -4  12  -1   28.97    9.61
   4  12  -1   30.83   11.35
  -4  12   1   26.61   10.91
  -4 -12   1   29.45   11.95
   5   8   2  334.07   30.75
  -5  -8  -2  361.91   33.43
  -5   8  -2  397.97   37.75
   5  -8   2  422.45   34.47
   5  -8  -2  433.76   42.74
   5   8  -2  385.46   41.41
  -5   8   2  460.93   47.75
  -5  -8   2  366.90   37.45
   5   8   2  362.60   28.21
   2   8  -3  485.89   44.51
  -2  -8  -3  535.18   36.98
  -2   8  -3  524.64   47.25
   2  -8  -3  531.73   33.66
   2   8   3  512.20   46.75
  -2   8   3  556.13   50.20
  -2   8  -3  453.21   32.53
  -2  -8  -3  562.83   44.49
   2  -8  -3  502.90   40.64
   2  -8   3  453.02   38.39
  -2  -8   3  501.51   35.29
   2  12  -2   31.19   10.21
   2 -12   2   33.85   12.49
  -2  12   2   50.88   16.70
  -2  12  -2   25.66   11.63
   2 -12  -2   29.75    9.95
  -2 -12  -2   42.41   13.15
   2  12   2   31.50    8.92
  -2 -12   2   33.95   12.67
   2  12   2   23.16    7.95
   2 -12  -2   16.27    4.63
  -2  12  -2   33.90   10.82
  -6  -5   2   86.80   19.56
   6   5   2   57.98   10.53
   6  -5  -2   57.31   15.99
   6   5   2   54.85   13.55
  -6   5   2   79.20   19.13
   6  -5   2   81.58   20.19
  -6  -5   2  107.42   17.66
   6  -5   2   57.72   10.87
   6   5  -2   79.14   20.74
  -6  -5  -2   59.42   14.64
  -6   5  -2   60.10   16.58
   4  10   2  116.56   16.67
   4  10   2  159.76   23.32
  -4  10   2  187.67   31.48
  -4  10  -2  144.67   23.83
   4  10  -2  146.52   25.85
  -4 -10  -2  138.74   20.78
   4 -10  -2  152.85   24.89
  -4 -10   2  123.24   21.96
  -7   5   1  715.91   57.64
   7   5   1  761.13   44.30
   7  -5   1  697.45   48.01
  -7  -5  -1  818.48   51.38
  -7   5  -1  739.59   49.64
  -7  -5   1  699.27   51.67
  -7   5  -1  693.77   61.11
   7  -5  -1  681.98   54.12
  -7  -5   1  717.37   43.68
   7   5   1  765.41   39.62
   0   9  -3  384.38   40.31
   0  -9  -3  374.42   31.14
   0   9  -3  321.24   31.98
   0  -9  -3  398.27   36.06
   0  -9   3  348.82   30.27
   0   9   3  439.87   46.64
   0  15   0   -8.44   10.79
   0  15   0   -2.42    6.97
   0 -15   0    4.89    6.19
  -3   7  -3 1424.80   77.69
   3   7  -3 1531.13   82.57
   3  -7  -3 1422.94   50.63
   3  -7   3 1322.56   71.69
   3   7   3 1274.90   69.76
  -3  -7   3 1341.75   56.88
  -3  -7   3 1424.43   77.87
   3  -7  -3 1383.56   69.56
  -3  -7  -3 1474.83   74.42
  -2 -14  -1  194.07   27.22
  -2  14   1  202.91   30.65
   2 -14   1  197.10   27.14
   2  14   1  172.04   21.19
   2  14  -1  129.00   21.63
  -2  14  -1  215.30   32.28
  -2 -14   1  161.22   25.88
  -2  14  -1  214.58   29.96
   2 -14  -1  190.71   21.22
   2  14   1  187.76   26.86
  -4   5  -3    7.70    9.48
   4  -5  -3   -0.44    6.38
  -4   5   3  -12.05   10.00
   4   5   3   -0.44    6.74
  -4  -5   3   -0.07   10.25
   4  -5   3    3.47    9.04
  -4  -5  -3   -0.20    6.82
   4   5  -3   11.73   12.62
   1  -9  -3  102.16   18.82
   1   9  -3   88.53   19.97
  -1  -9  -3  127.27   21.73
  -1   9  -3   92.92   17.17
  -1  -9   3   84.30   15.18
   1  -9   3   90.67   16.39
  -1   9  -3   97.06   19.64
  -1   9   3  114.98   23.40
   1   9  -3   95.59   19.37
   1   9   3  108.67   23.68
   1  -9  -3   97.37   15.14
  -1  -9  -3  113.48   19.20
   4  13   0  234.67   27.78
   4 -13   0  306.24   39.83
  -4 -13   0  276.26   34.26
  -4  13   0  257.46   33.37
   4 -13   0  227.50   21.36
  -1 -15   0 1159.06   65.12
   1  15   0 1256.71   74.00
   1 -15   0 1103.37   56.79
  -1  15   0 1337.15   79.30
  -1  15   0 1199.59   58.79
  -3 -14   0   28.06   11.90
   3 -14   0   29.36   10.12
  -3  14   0   23.55   11.70
  -3  14   0   28.83   13.05
   3  14   0   12.16    6.55
  -5  11  -1   47.32   13.68
  -5 -11   1   39.25   12.90
   5  11   1   36.68   10.91
  -5  11  -1   44.95   16.37
   5 -11  -1   46.12   13.29
   5 -11   1   33.07   11.66
   5  11   1   31.31    9.18
  -5 -11  -1   51.93   14.96
   5  11  -1   23.25    8.73
  -5  11   1   58.29   19.10
   6  -9   1 1390.24   75.95
   6   9   1 1408.14   57.65
  -6   9   1 1593.25   95.66
   6   9   1 1535.87   63.41
  -6   9  -1 1264.44   60.39
   6  -9  -1 1379.07   81.33
   6   9  -1 1310.04   67.88
  -6   9  -1 1397.38   91.23
   7   7   0 1447.98   64.91
   7   7   0 1403.06   52.89
   0 -13  -2    1.45    7.63
   0  13  -2    5.21    8.79
   0 -13   2   -9.57   10.52
   0  13   2   -3.44    7.29
  -6  -6   2   50.11   14.57
  -6   6   2   48.29   15.29
   6   6   2   42.80    9.95
   6   6  -2   47.82   18.22
   6   6   2   35.10   11.87
  -6  -6   2   30.27    8.66
   6  -6  -2   39.56   15.07
   6  -6   2   41.09   11.02
  -6   6  -2   59.90   17.33
  -6  -6  -2   42.14   11.70
   6  10   0  299.89   30.15
  -6  10   0  300.46   41.20
   6 -10   0  334.71   41.99
  -6 -10   0  428.86   41.48
  -7  -6  -1  316.18   32.06
   7   6  -1  343.61   39.19
   7   6   1  309.62   26.27
  -7   6  -1  254.98   38.07
   7  -6   1  265.89   30.63
  -7  -6   1  272.53   33.87
  -7   6  -1  251.58   27.92
  -7   6   1  295.01   38.77
   7  -6  -1  297.34   36.59
   7   6   1  302.43   27.99
  -7  -6   1  268.86   26.26
   5   0  -3   85.79   28.17
  -5   0   3  128.13   23.79
  -5   0  -3  161.19   34.46
  -5   0   3  144.15   31.27
   5   0   3  187.42   36.45
  -1 -13   2  140.51   26.07
  -1  13  -2  155.05   27.83
   1 -13   2  112.30   16.05
  -1  13   2  151.21   25.76
   1  13   2  121.04   21.45
   1  13  -2  124.46   22.63
   1 -13  -2  119.75   21.12
   1  13   2  139.56   23.05
  -1 -13  -2  131.68   20.60
   1 -13   2  148.16   28.09
   1 -13  -2  113.09   16.93
   5   1   3  724.61   58.82
  -5   1  -3  591.88   49.21
   5  -1  -3  640.46   54.06
  -5   1   3  742.05   55.71
   5  -1   3  561.43   51.38
  -5  -1   3  614.23   48.55
  -5  -1   3  709.46   50.25
  -5  -1  -3  730.08   55.65
  -5   1   3  731.09   47.18
   5   1  -3  642.76   54.98
  -5  12   0  303.14   39.98
   5 -12   0  340.06   42.62
   5  12   0  243.43   27.85
  -5 -12   0  326.82   36.11
   5   9   2   82.68   15.33
   5   9   2   71.02   12.43
   5   9  -2   98.57   21.88
   5  -9   2   95.84   17.46
  -5  -9  -2   70.12   15.63
  -5  -9   2   64.16   15.41
  -5   9  -2   82.12   17.44
   5  -9  -2   96.61   20.21
   4   6   3  192.23   26.74
  -4  -6  -3  192.67   26.84
  -4   6   3  201.66   30.39
  -4  -6   3  228.13   33.01
   4  -6  -3  216.22   28.45
  -4   6  -3  214.49   28.68
  -4  -6   3  175.89   21.43
   4   6  -3  239.96   35.58
   4  -6   3  236.64   32.72
  -8   0   0   12.35    8.78
   8   0   0   -0.51   10.15
  -8   0   0   14.13    8.96
   2  -9  -3    6.39    7.24
  -2  -9  -3  -14.49   11.85
   2  -9  -3    2.20    6.42
   2   9   3   -3.63   12.03
  -2  -9   3   13.38    6.01
   2  -9   3   13.84    9.90
  -2   9   3   23.78   12.04
  -2   9  -3    9.19    9.39
   2   9  -3   21.79   11.77
  -2   9  -3    2.74    7.19
  -2  -9  -3    5.71    6.30
  -8   1   0   39.43   14.09
   8   1   0   42.00   15.74
   8  -1   0   37.56   13.10
  -8   1   0   50.93   15.09
  -8  -1   0   40.05   12.49
  -8  -1   0   52.59   16.29
   2  15   0   71.17   17.47
   2 -15   0   83.36   15.57
  -2 -15   0   70.54   17.42
  -2  15   0  108.45   23.83
  -2  15   0   73.95   17.06
   5   2   3  590.16   52.74
  -5  -2   3  861.53   55.62
  -5  -2   3  831.79   56.91
   5  -2  -3  637.08   52.43
  -5   2  -3  645.36   53.39
  -5  -2  -3  704.83   54.32
   5  -2   3  650.50   56.76
  -5   2   3  676.05   55.51
  -5   2   3  696.51   43.71
   5   2  -3  707.87   59.84
  -3  -8   3   59.38   12.36
   3   8  -3   79.03   21.27
   3  -8  -3   79.04   17.87
  -3  -8  -3   77.79   18.10
  -3  -8   3   44.94   12.01
   3  -8   3   60.99   16.82
  -3   8   3   84.86   21.62
  -3   8  -3   75.87   18.36
   3   8   3   71.55   16.95
   0 -15   1  554.20   46.72
   0  15  -1  626.87   54.74
   0  15   1  666.48   49.03
   0 -15  -1  633.01   46.22
   0  15   1  613.41   51.48
   3  12   2  205.38   26.17
  -3 -12  -2  204.92   26.02
   3 -12  -2  228.22   30.68
  -3 -12   2  223.25   32.14
   3  12   2  250.99   30.34
  -3  12  -2  287.23   38.64
  -3  12  -2  213.84   28.37
  -3  12   2  290.30   38.91
   3  12  -2  207.79   30.27
  -8   2   0  140.55   26.15
   8   2   0  149.14   26.86
   8  -2   0  126.23   23.83
  -8  -2   0  150.50   23.93
  -8  -2   0  132.23   25.01
  -8   2   0  148.76   22.75
   0  10   3   -7.91   15.19
   0  10  -3    1.84    5.64
   0  10  -3   -1.38    7.22
   0 -10  -3   -8.63   10.69
   0 -10   3  -12.26    7.78
   0 -10  -3  -15.63   10.79
  -4  11  -2  344.21   33.54
  -4 -11   2  309.00   36.38
   4  11   2  313.26   30.65
  -4 -11  -2  306.22   31.59
   4  11  -2  355.02   41.22
  -4  11  -2  403.97   41.92
   4  11   2  379.76   36.25
   4 -11  -2  373.29   40.78
   4  13  -1  603.16   48.32
  -4  13  -1  805.32   64.90
  -4 -13  -1  773.64   54.87
   4 -13  -1  793.65   61.43
  -4 -13   1  628.38   49.31
   4  13   1  682.85   49.74
   1 -15   1  817.77   56.23
  -1 -15   1  774.29   56.94
  -1 -15  -1  904.11   58.04
  -1  15  -1  932.68   55.08
  -1  15  -1  974.20   70.69
   1  15   1  824.07   58.01
  -1  15   1  833.90   60.10
   1 -15  -1  894.17   51.33
   1  15  -1  812.48   60.34
   1  15   1  907.35   52.65
  -1  15   1  959.58   60.87
  -5  -3   3  464.63   44.59
   5   3   3  261.45   32.86
  -5  -3   3  489.77   40.56
  -5   3   3  372.83   41.91
  -5  -3  -3  355.35   38.61
   5  -3  -3  329.25   37.53
  -5   3  -3  349.80   41.61
   5   3  -3  425.65   49.22
   5  -3   3  364.27   43.89
   3  14   1    7.98    6.28
  -3  14   1   25.06   13.09
  -3  14  -1   33.72   13.96
  -3 -14   1   17.57    9.81
   3  14   1   14.95    8.38
   3 -14   1   32.07   11.00
  -3 -14  -1   21.02    9.33
   3 -14  -1   32.35   12.41
  -3  14  -1   21.84   10.97
   3  14  -1   24.72   10.94
   7   0   2   14.22   13.89
  -7   0  -2   78.78   23.92
   7   0  -2   37.64   20.31
  -7   0   2   15.62   15.74
   1 -10  -3    3.45    5.09
   1  10   3    6.74   11.23
  -1 -10   3   19.19    7.55
   1 -10  -3   10.91    7.12
  -1  10   3    3.32   10.37
  -1  10  -3    6.96    7.74
  -1  10  -3    3.20    6.02
  -1 -10  -3   22.56   10.24
  -1 -10  -3   -4.45    9.93
   1 -10   3   12.02    5.30
   1  10  -3   12.69    8.87
   7   8   0  267.06   28.42
   7   8   0  218.05   20.90
  -7   8   0  214.01   36.83
   7  -8   0  182.22   30.53
  -6  -7   2  235.94   30.73
   6   7  -2  248.55   35.82
   6  -7  -2  287.50   35.77
  -6   7   2  308.88   40.09
  -6   7  -2  247.89   30.12
   6   7   2  219.63   21.97
  -6  -7  -2  212.40   27.03
   6  -7   2  247.22   24.79
   6   7   2  223.90   26.38
  -7   1  -2  298.57   37.37
   7   1  -2  302.30   39.33
   7  -1  -2  318.92   41.31
   7   1   2  259.56   37.52
   7  -1   2  274.81   35.07
  -7  -1   2  294.00   32.77
  -7  -1   2  254.08   26.97
  -7   1   2  376.83   40.53
   2  13  -2 1119.91   67.81
  -2 -13   2 1314.14   78.87
   2 -13   2 1434.07   73.98
   2  13   2 1276.37   68.64
   2  13   2 1122.72   63.36
  -2  13   2 1486.45   85.26
  -2 -13  -2 1291.37   66.80
   2 -13  -2 1223.70   69.37
  -7   7   1   15.11    9.45
   7   7   1   26.00    8.89
  -7   7  -1   22.59   13.41
  -7  -7  -1   21.44   10.30
  -7   7  -1   16.36    8.45
   7  -7  -1   32.65   13.75
   7   7   1   20.65   10.02
   7  -7   1   26.68   11.85
   7   7  -1   28.73   13.25
  -7  -7   1   32.58   13.75
  -7  -7   1    6.18    5.57
  -8  -3   0  353.75   35.96
   8   3   0  367.34   39.44
  -8   3   0  271.53   37.08
   8  -3   0  246.68   32.82
  -8   3   0  310.28   31.97
  -8  -3   0  360.57   39.07
  -6  10  -1  487.75   39.32
  -6  10   1  585.44   59.70
   6  10   1  512.83   36.56
   6  10   1  484.03   36.20
  -6 -10  -1  627.85   47.03
   6 -10   1  495.57   48.86
  -6 -10   1  456.75   42.85
   6  10  -1  559.81   47.18
  -6  10  -1  518.61   54.74
   6 -10  -1  562.80   53.92
  -7  -2  -2  858.11   58.92
  -7   2  -2  865.33   62.91
   7  -2  -2  727.50   58.12
   7   2   2  617.19   50.15
   7   2  -2  804.55   63.17
  -7  -2   2  930.27   58.33
  -7   2   2  815.82   57.43
  -7  -2   2  798.16   51.96
   7  -2   2  725.48   57.99
  -4   7  -3  378.15   40.47
  -4  -7  -3  373.15   38.73
   4  -7  -3  387.61   38.52
   4   7  -3  401.60   45.06
   4  -7   3  407.61   43.65
  -4  -7   3  320.29   26.56
  -4   7   3  447.66   48.10
  -4  -7   3  422.76   45.23
   4   7   3  310.41   33.32
  -5  -4   3  148.14   23.38
   5  -4   3   87.50   21.89
  -5   4   3   97.96   22.40
   5   4   3   52.68   15.84
  -5  -4  -3   81.03   19.31
  -5   4  -3   57.95   16.98
   5   4  -3  109.40   28.60
  -5  -4   3   94.88   22.39
   5  -4  -3   87.59   20.45
   5 -12   1   13.31   13.44
  -5  12   1    5.97    9.73
  -5 -12   1    3.25    5.57
  -5  12  -1   22.47   17.09
  -5 -12  -1    3.80    5.10
   5  12  -1   -3.52    8.18
   5 -12  -1   14.72   10.93
  -5  12  -1   -2.11    6.07
   5  12   1   14.42    8.58
   0   0   4 2092.97  102.46
   0   0  -4 1854.85   85.47
  -8   0   1  907.38   62.02
  -8   0   1  801.74   50.55
   8   0  -1  896.26   65.58
  -8   0  -1  851.89   60.05
   8   0   1  823.45   57.42
  -8   0  -1  810.34   57.42
  -8   4   0  107.04   25.59
  -8  -4   0  155.54   23.74
  -8  -4   0  170.01   26.50
  -8   4   0  141.81   21.02
   8  -4   0   78.65   19.96
   8   4   0  158.68   25.80
   0   1   4  130.72   34.94
   0   1  -4  159.51   41.84
   0  -1  -4  153.49   28.09
   0  -1   4  290.21   60.62
  -6  11   0  208.74   33.51
   6 -11   0  252.31   37.81
  -6 -11   0  281.84   34.17
   6  11   0  213.93   26.04
   7  -3  -2  230.96   34.06
   7  -3   2  260.62   38.27
   7   3  -2  335.01   45.26
  -7   3  -2  250.29   36.07
  -7  -3  -2  231.67   31.07
  -7   3   2  241.46   32.90
   7   3   2  172.15   25.23
  -8  -1   1  593.95   49.72
  -8   1   1  569.20   41.03
  -8  -1  -1  578.93   48.44
   8   1  -1  618.92   56.34
   8  -1  -1  589.36   53.28
  -8   1  -1  545.39   50.19
  -8   1  -1  590.63   50.25
  -8   1   1  588.54   50.81
  -8  -1   1  544.14   43.86
   8   1   1  562.41   44.73
   8  -1   1  570.34   52.08
   4  14   0   -0.03    5.74
  -4  14   0  -19.03   12.30
   4 -14   0    6.27    6.54
   4 -14   0    4.16    7.70
  -4 -14   0    2.70    7.31
  -2  15  -1  -15.10   13.32
  -2 -15  -1    6.99    9.40
   2 -15  -1  -12.93   10.73
  -2  15  -1   -9.19    9.10
   2  15  -1   -4.04    7.29
   2 -15   1   -9.57   11.34
   2  15   1   13.77    7.24
   2  15   1    3.48    6.20
  -2 -15   1    5.36    8.55
   0  16   0   69.92   18.85
   0 -16   0   61.31   14.30
   5 -10  -2  251.06   33.01
   5  10   2  210.79   26.32
   5  10  -2  212.79   32.58
  -5 -10   2  202.99   28.37
  -5 -10  -2  198.31   25.71
   5  10   2  217.25   24.17
   5 -10   2  274.10   33.09
  -5  10  -2  222.74   29.77
  -5  10   2  272.48   39.59
   3   9   3  186.71   28.02
  -3   9  -3  149.52   19.37
  -3   9   3  225.65   34.08
  -3   9  -3  188.50   30.88
  -3  -9   3  199.01   33.13
   3  -9  -3  188.99   27.05
   3   9  -3  195.69   31.28
  -3  -9  -3  220.29   29.98
   3  -9   3  183.46   27.43
  -2 -10  -3  248.57   28.40
   2 -10  -3  264.24   32.29
   2 -10  -3  223.76   21.38
  -2 -10  -3  257.56   31.35
  -2 -10   3  243.48   35.09
  -2  10  -3  238.60   33.72
   2 -10   3  194.17   25.30
   2  10  -3  237.67   32.13
   2  10   3  285.55   37.28
  -2  10   3  247.78   34.86
  -2  10  -3  213.87   26.19
  -1   0  -4   29.02   16.55
   1   0  -4   20.49   14.50
  -1   0   4   34.93   26.34
   1   0  -4   25.70   13.82
   1   0   4   23.50   23.59
   0  -2  -4   54.17   15.77
   0  -2   4   73.74   20.70
   0   2   4   67.22   20.41
   0   2  -4   90.72   29.21
  -3  15   0  151.64   24.96
   3 -15   0  138.82   19.47
  -3 -15   0  138.54   25.45
  -3  15   0  169.12   28.47
   3  15   0  126.53   22.90
  -8  -2  -1   55.24   17.67
  -8  -2   1   80.53   19.75
  -8   2  -1   55.89   18.46
   8   2  -1   72.75   26.86
   8   2   1   34.09   14.12
   8  -2  -1   74.78   22.71
   8  -2   1   35.61   18.00
  -8   2  -1   47.27   20.57
  -8  -2   1   23.38   12.54
  -8   2   1   53.44   17.90
   1  -1  -4  179.85   24.82
  -1  -1   4  232.20   35.65
   1  -1  -4  206.70   29.50
   1   1   4  188.79   30.63
  -1   1   4  257.53   39.95
   1  -1   4  204.20   31.16
   1   1  -4  177.99   25.52
  -1   1  -4  173.67   27.27
  -1  -1  -4  195.01   28.56
   1   1  -4  204.02   29.94
   0  14   2  125.52   22.59
   0  14  -2  152.63   27.44
   0 -14  -2  149.75   22.99
   0  14   2  159.19   26.45
   0 -14   2  158.70   29.72
  -1  16   0   46.05   15.27
  -1 -16   0   29.83   11.53
   1 -16   0   47.06   12.74
   1  16   0   47.50   16.01
  -1  16   0   50.89   13.35
   5   5   3   30.63   12.07
  -5  -5   3   37.61   12.03
   5  -5   3   43.08   15.46
  -5   5  -3   45.66   14.64
   5  -5  -3   42.16   13.48
   5   5  -3   21.55   12.57
  -5  -5   3   61.89   18.75
  -5  -5  -3   32.59   11.13
  -5   5   3   38.51   13.92
   6   8  -2   11.41   10.85
   6   8   2   -2.58    7.19
  -6   8  -2   -4.92    8.73
   6   8   2   -1.10    4.66
   6  -8  -2    2.26    7.79
  -6  -8  -2   14.30    8.18
  -6   8   2   -2.61   12.33
   6  -8   2   -1.51    5.13
  -6  -8   2    6.69    7.86
  -1  -2   4   61.30   24.21
  -1   2  -4   40.02   17.66
   1   2   4   40.94   24.19
   1  -2  -4   38.39   14.90
  -1   2   4   62.16   30.14
   1  -2  -4   45.93   18.43
  -1  -2  -4   38.46   16.41
   1   2  -4   22.57   15.85
   1  -2   4   63.38   21.83
   1   2  -4   36.27   14.33
  -5  13   0  176.43   30.58
   5 -13   0  196.55   35.23
   5  13   0  136.97   21.97
  -5 -13   0  175.74   27.51
   7   4   2   80.28   18.31
   7  -4  -2  116.00   23.61
  -7  -4  -2  115.90   21.90
   7   4  -2  128.06   27.70
  -7   4   2  148.09   28.11
  -7  -4   2  182.91   24.27
  -7   4  -2  125.31   23.98
  -7  -4   2  162.57   24.60
   7  -4   2  112.26   25.93
   7   8  -1  351.36   37.28
   7  -8  -1  326.53   41.76
  -7   8  -1  254.77   26.18
   7   8   1  369.89   29.65
  -7  -8  -1  395.86   37.10
  -7   8  -1  336.18   48.11
  -7  -8   1  327.05   37.31
   7   8   1  380.40   31.64
   7  -8   1  299.21   34.11
  -7   8   1  337.00   43.30
   0  -3  -4    2.94   15.00
   0   3  -4   22.57   16.06
   0   3   4   18.07   27.43
   0  -3   4   27.87   16.25
   1  14   2   61.18   16.12
   1 -14   2   74.48   18.50
  -1 -14   2   51.19   17.42
   1  14   2   31.87   11.82
   1 -14  -2   44.59   11.25
   1 -14  -2   58.90   15.86
   1 -14   2   28.88    8.96
   1  14  -2   56.33   16.39
  -1  14  -2   55.71   17.50
  -1 -14  -2   51.56   14.47
  -1  14   2   71.14   20.59
   8   3   1  505.45   37.69
   8   3  -1  635.12   55.83
  -8  -3   1  515.85   45.35
  -8  -3  -1  589.79   47.41
  -8  -3   1  489.96   44.73
  -8   3   1  512.00   48.82
   8  -3   1  551.32   47.22
  -8   3  -1  547.61   47.80
   8  -3  -1  489.18   47.73
   8   3   1  518.53   44.63
  -8   3  -1  496.40   51.98
   8   5   0  258.44   30.29
   8  -5   0  162.06   26.81
  -8   5   0  225.98   37.43
  -8  -5   0  319.00   36.16
   7   9   0   -0.66    5.51
   7  -9   0   -1.07    8.10
  -7   9   0   -8.68   11.59
  -7  -9   0   12.58    9.48
   0 -11  -3  200.85   24.84
   0 -11  -3  223.19   29.78
   0 -11   3  144.90   18.78
   0  11  -3  174.38   25.66
   0  11   3  233.23   33.90
   0  11  -3  203.10   33.46
   3  13  -2   83.77   21.29
   3  13   2   93.90   18.56
  -3 -13  -2   80.92   16.70
  -3 -13   2   78.83   21.20
   3 -13  -2  106.56   22.51
  -3  13  -2   97.12   21.53
  -3  13  -2  101.52   25.11
   3  13   2   95.40   19.39
  -3  13   2  138.38   29.92
   4  -8  -3  244.45   31.21
   4  -8   3  247.82   34.40
  -4   8  -3  241.55   33.79
  -4  -8   3  259.68   36.20
  -4  -8  -3  210.95   29.30
  -4   8   3  295.04   40.25
   4   8  -3  267.64   38.22
   4   8   3  215.86   29.39
  -1  -3   4  263.33   35.35
  -1   3  -4  245.74   34.40
  -1   3   4  338.96   49.94
   1  -3   4  200.38   29.03
   1   3   4  240.59   37.11
   1  -3  -4  219.64   26.04
   1  -3  -4  260.00   30.06
  -1  -3  -4  221.23   27.48
   1   3  -4  191.67   24.15
   1   3  -4  256.54   33.36
   4  12   2   12.30    6.69
   4  12   2    9.02    8.23
  -4 -12   2    1.57    6.49
   4 -12  -2   13.26   10.55
  -4 -12  -2   19.10   10.13
  -4  12  -2   21.17   13.74
  -4  12  -2    1.10    6.04
   4  12  -2   19.10   12.16
  -1  11   3  289.77   38.51
  -1 -11  -3  293.78   32.48
   1 -11   3  212.18   24.45
   1 -11  -3  262.62   32.88
   1  11   3  311.34   39.68
  -1 -11  -3  261.27   30.21
   1  11  -3  207.19   28.63
  -1  11  -3  291.69   39.02
   1 -11  -3  239.64   23.71
  -1  11  -3  228.56   28.17
   2   0   4   52.44   21.80
   2   0  -4   29.64   13.50
  -2   0  -4   30.22   16.17
   2   0  -4   58.35   18.20
  -2   0   4   49.34   24.99
   2  -1   4   88.89   21.58
  -2  -1   4  170.40   33.05
  -2   1   4  161.17   32.33
   2   1  -4  107.65   21.70
   2   1  -4  108.65   22.11
   2  -1  -4  119.16   22.38
  -2  -1  -4  118.67   22.15
   2   1   4  110.99   24.63
   2  -1  -4  144.32   24.96
  -2   1  -4   95.04   21.50
   0   4  -4  543.93   51.87
   0  -4  -4  539.97   43.84
   0  -4   4  570.00   49.70
   0   4   4  679.78   66.52
  -8   4   1  650.31   55.90
  -8  -4  -1  780.75   54.97
   8   4  -1  812.96   65.46
   8  -4  -1  642.02   54.43
  -8   4  -1  743.57   55.20
  -8   4  -1  635.42   61.71
   8   4   1  678.54   49.64
   8  -4   1  634.58   49.87
   8   4   1  704.00   42.27
  -8  -4   1  709.03   55.13
  -8  -4   1  715.53   50.22
   2  16   0  120.51   24.30
  -2  16   0  150.53   28.01
  -2 -16   0  101.57   21.13
   2 -16   0  114.67   17.90
  -2  16   0  117.94   21.79
  -6  11   1   80.94   25.15
  -6 -11   1   52.70   15.21
   6  11  -1   66.36   18.74
   6  11   1   51.37   13.33
  -6  11  -1   53.29   12.38
   6  11   1   62.21   12.98
   6 -11   1   52.89   17.04
  -6  11  -1   76.71   22.76
   6 -11  -1   89.55   23.00
  -6 -11  -1   89.11   18.60
   7  -5  -2   75.35   20.09
  -7   5  -2   77.07   17.64
   7   5  -2   78.96   22.47
   7   5   2   65.76   16.74
  -7  -5   2   88.61   19.47
  -7  -5  -2   96.62   20.75
  -7  -5   2   76.67   14.93
  -7   5   2   81.37   19.70
  -4 -14   1   82.27   19.31
  -4  14   1  106.30   23.91
   4 -14  -1  101.16   22.11
  -4 -14  -1   92.44   20.26
   4 -14   1   76.88   16.29
   4  14   1   92.52   21.08
   4  14  -1   84.03   18.33
  -4  14  -1  111.40   26.05
   0 -16   1   -6.42    8.18
   0  16  -1   -7.46   10.12
   0 -16  -1    3.85    7.84
   0  16   1   -7.78   11.02
   0  16   1   11.73   10.44
   5   6   3  122.21   21.63
   5  -6   3  155.44   30.29
   5   6  -3  169.23   31.21
  -5  -6   3  129.93   18.85
  -5  -6  -3  153.32   25.10
  -5   6  -3  140.02   25.97
   5  -6  -3  143.13   24.43
  -5   6   3  171.18   31.45
  -5  -6   3  163.67   29.02
  -2  -2  -4   17.78   12.85
   2  -2   4   16.35   12.28
  -2  -2   4   32.29   19.35
   2  -2  -4   17.44   10.15
  -2   2   4   31.11   23.34
   2   2   4   25.30   18.05
   2   2  -4   21.99   14.01
  -2   2  -4   23.52   14.90
   2  -2  -4   12.37    9.22
   2   2  -4   21.32   11.32
  -1   4   4   24.53   19.33
   1   4   4   22.54   19.59
   1   4  -4    5.63   10.75
   1  -4   4   19.22   12.88
  -1  -4  -4   29.56   14.37
   1   4  -4    1.55    6.02
  -1  -4   4   -5.90   10.07
   1  -4  -4    4.19    7.22
  -1   4  -4   20.94   14.25
   1  -4  -4   16.28   10.81
  -3  15  -1  334.20   40.81
  -3 -15  -1  299.04   36.95
   3 -15   1  271.80   31.62
   3  15   1  263.33   34.60
   3  15  -1  227.72   30.07
  -3 -15   1  216.88   30.97
   3 -15  -1  293.76   37.45
  -3  15  -1  321.95   39.97
  -3  15   1  322.27   40.86
  -2  14  -2   -4.35   12.94
   2  14   2   17.26   11.31
  -2  14   2   29.18   11.80
   2  14  -2   24.24   10.91
  -2 -14   2   34.31   13.01
   2  14   2   34.74   14.54
   2 -14  -2   30.80   12.15
   2 -14   2   12.43    9.23
  -2 -14  -2   36.10   13.02
  -8   6   0  698.30   65.91
  -8  -6   0 1061.61   66.80
   8  -6   0  511.85   50.12
   8   6   0  874.08   55.46
  -1  16   1   54.36   17.63
  -1  16   1   71.20   18.69
   1  16  -1   52.36   18.85
   1 -16   1   56.76   16.67
   1 -16  -1   38.42   11.20
  -1  16  -1   62.69   18.03
   1  16   1   41.97   12.19
  -1 -16   1   34.39   11.71
  -1 -16  -1   16.70    7.29
   1  16   1   43.02   14.98
   3  10   3   57.76   16.10
   3 -10  -3   53.90   13.64
  -3  10  -3   65.16   15.95
   3 -10   3   51.31   13.23
  -3 -10   3   84.76   22.30
  -3  10  -3   37.95    8.03
   3  10  -3   59.29   17.59
  -3 -10  -3   83.86   19.23
  -3  10   3   86.63   20.70
   6   0   3  233.43   33.32
  -6   0   3  232.85   26.96
  -6   0  -3  230.60   32.60
  -6   0   3  263.94   33.74
   6   0  -3  242.74   35.43
  -5 -11   2  329.38   37.60
   5 -11   2  456.73   45.35
   5  11   2  418.71   37.96
  -5 -11  -2  348.07   35.87
   5 -11  -2  443.29   45.67
   5  11  -2  400.54   45.20
  -5  11  -2  430.67   51.53
   5  11   2  364.95   34.47
  -5  11  -2  416.52   43.27
   5 -13  -1   19.62   10.92
  -5  13  -1   24.65   13.24
  -5 -13  -1   34.43   12.98
   5  13   1   24.00   10.20
  -5  13   1   43.36   19.01
   5  13  -1   28.38   12.61
  -5 -13   1    4.77    6.46
   5 -13   1   23.04   15.02
   2   3   4   86.95   23.01
  -2   3  -4   99.38   22.02
   2   3  -4   99.55   20.50
   2   3  -4   96.21   21.03
  -2   3   4  144.76   34.33
  -2  -3   4  105.56   24.09
   2  -3   4  103.06   21.53
   2  -3  -4  129.76   22.59
  -2  -3  -4   90.83   20.11
   2  -3  -4  102.40   20.17
  -6  -1   3   64.86   18.91
  -6  -1  -3   50.48   16.69
   6  -1   3   56.16   21.00
   6  -1  -3   43.67   16.85
   6   1   3   35.96   14.66
   6   1  -3   49.58   20.40
  -6   1   3   34.98   13.42
  -6   1  -3   38.66   20.35
   6 -12   0    6.83   12.48
  -6 -12   0   -2.94    9.79
  -6  12   0   -5.70   10.79
   6  12   0    6.69    6.20
   6  -9   2   -4.38    8.28
  -6  -9  -2    5.12    6.89
  -6   9   2    0.36   11.01
   6   9  -2    4.77    8.63
  -6  -9   2   -5.24    9.14
   6  -9  -2    5.21    8.89
  -6   9  -2   21.93   11.19
   6   9   2   11.34    5.51
   6   9   2  -10.22   10.59
  -2 -11   3   41.52   14.50
  -2 -11  -3   44.90   13.96
   2 -11  -3   56.66   15.79
  -2 -11  -3   69.99   16.98
  -2  11   3   50.23   17.21
  -2  11  -3   58.65   17.45
   2  11   3   67.37   20.42
   2 -11   3   58.99   14.79
   2  11  -3   39.68   13.20
  -2  11  -3   41.08   10.36
   0  -5   4   16.59   11.74
   0   5   4    3.71   10.96
   0  -5  -4   -3.47    8.44
   0   5  -4    1.86   11.62
   8   5  -1   83.98   24.48
   8  -5  -1   49.99   17.09
  -8  -5   1   54.05   19.10
  -8   5  -1   44.62   14.10
  -8   5   1   49.64   14.01
   8   5   1   65.79   15.57
  -8  -5   1   60.20   15.05
  -8   5  -1   54.67   22.37
   8  -5   1   44.92   14.65
  -8  -5  -1   58.54   15.02
   8   5   1   57.86   11.95
  -7  -9   1  444.57   44.32
   7   9   1  581.04   38.60
   7   9   1  597.83   40.59
  -7   9   1  548.89   57.65
  -7  -9  -1  653.48   48.06
   7   9  -1  636.58   51.84
   7  -9   1  479.41   44.68
  -7   9  -1  518.61   60.14
   7  -9  -1  559.14   54.96
   6  -2  -3   16.29   10.78
  -6   2  -3    8.06    7.55
   6   2  -3   22.85   13.43
  -6  -2   3   10.46    8.44
   6   2   3    8.93   10.43
   6  -2   3   10.57   10.68
  -6  -2   3   19.08   10.70
  -6   2   3   38.09   17.69
  -6  -2  -3   44.31   15.50
   7   6  -2  396.90   44.49
  -7  -6  -2  372.58   37.35
  -7  -6   2  385.59   38.70
   7   6   2  332.60   32.98
  -7  -6   2  405.74   34.15
   7  -6  -2  416.40   44.15
  -7   6   2  478.86   51.33
  -7   6  -2  444.55   43.42
   7 -10   0  325.48   44.05
  -7  10   0  347.36   49.04
   7  10   0  376.12   35.59
  -7 -10   0  491.69   46.40
   1  -5  -4  227.75   28.17
   1   5   4  238.30   37.67
  -1  -5  -4  198.78   27.76
  -1   5   4  304.94   45.50
  -1  -5   4  262.22   34.31
  -1   5  -4  230.34   34.12
   1   5  -4  231.83   32.39
   1  -5   4  202.84   28.59
   1   5  -4  188.59   24.71
   1  -5  -4  202.40   24.66
   4  -9   3   80.07   20.46
  -4   9   3   91.50   22.23
   4  -9  -3   77.14   19.15
  -4   9  -3   94.10   22.70
  -4  -9   3   70.74   18.75
  -4  -9  -3   57.50   14.56
   4   9  -3   69.60   21.43
   4   9   3   67.12   17.53
  -4  15   0  120.50   23.80
  -4 -15   0  118.79   23.98
   4 -15   0  149.92   29.80
   4  15   0   82.47   17.91
  -2  -4   4  238.29   35.88
   2   4   4  159.54   29.70
   2  -4   4  150.70   26.14
  -2  -4  -4  175.75   26.66
   2   4  -4  167.67   27.68
  -2   4   4  243.40   42.01
   2  -4  -4  148.69   23.54
   2  -4  -4  201.76   26.67
  -2   4  -4  161.01   28.31
   2   4  -4  150.89   25.04
   5  -7   3   -6.78   13.34
   5  -7  -3   16.86   11.50
  -5   7   3  -13.93   15.85
  -5   7  -3    6.90    8.25
   5   7  -3   17.45   13.41
  -5  -7   3  -16.25   14.18
   5   7   3    0.61    6.19
   6  -3   3   55.76   17.06
   6   3   3   88.24   22.31
   6  -3  -3   85.10   21.06
  -6  -3   3   73.79   18.60
  -6   3  -3   92.19   22.37
  -6  -3   3   61.89   16.13
  -6   3   3   84.48   22.62
  -6  -3  -3   81.95   20.71
   6   3  -3   92.68   23.14
   2  16  -1  238.97   32.36
  -2 -16  -1  332.47   39.11
   2  16   1  280.11   35.51
  -2  16  -1  357.36   40.62
  -2  16   1  349.40   40.31
   2 -16  -1  269.25   27.34
  -2  16  -1  323.61   43.71
  -2 -16   1  270.43   36.25
   2 -16   1  293.83   33.69
   0 -12   3   -9.66    7.09
   0 -12  -3   -6.57    7.86
   0 -12  -3   -9.51    9.50
   0  12   3   -8.30   11.98
   0  12  -3   -8.69   10.37
  -8  -7   0  529.79   48.33
   8  -7   0  251.96   35.81
  -8   7   0  323.52   46.84
   8   7   0  419.36   37.82
   8   7   0  393.61   31.64
  -3   0  -4   -4.39   12.38
   3   0  -4   -3.57    7.31
   3   0   4    3.09    9.82
  -3   0   4   15.28   11.61
   3   0  -4   -8.35   13.22
   0  15  -2   14.33   11.98
   0 -15   2  -14.35   14.17
   0  15   2   -9.06    8.35
   0 -15  -2    0.94    6.16
   0  15   2   -2.37    7.00
   3  -1  -4   12.93   15.93
   3   1  -4   37.40   20.16
  -3  -1  -4   21.63   18.07
  -3   1  -4   22.34   12.10
  -3  -1   4   54.76   20.33
  -3   1   4   44.39   25.18
   3  -1  -4   20.66   13.99
   3  -1   4   29.81   14.56
   3   1  -4   12.33   10.20
   3   1   4   14.87   22.29
   0  17   0   -3.05    9.17
   0 -17   0    5.85    9.78
   5 -14   0   -2.53    9.91
  -5 -14   0  -25.78   14.60
   5  14   0   -6.55    9.62
  -5  14   0   16.88   14.04
  -3  16   0   26.69   12.88
  -3 -16   0   13.94   10.96
   3  16   0    7.66    7.34
   3 -16   0   12.00    6.92
  -3  16   0   13.44    8.01
   0   6  -4  200.22   23.21
   0   6  -4  257.16   35.82
   0  -6  -4  231.68   24.70
   0  -6   4  261.89   32.36
   0   6   4  320.23   47.16
   0  -6  -4  255.38   30.03
   8   6  -1   16.67   11.62
   8   6   1   21.19   10.69
   8  -6   1   -0.11    9.98
  -8   6   1   16.05    8.71
  -8  -6   1   29.38   13.53
   8   6   1    8.61    4.19
  -8  -6   1    6.53    7.03
  -8   6  -1    6.27    7.86
   8  -6  -1   32.17   14.88
  -8   6  -1   33.09   17.70
  -8  -6  -1   14.36    7.86
  -1 -12  -3  162.56   25.68
   1 -12  -3  158.04   25.91
  -1 -12  -3  142.20   23.35
  -1  12  -3  134.48   26.33
   1  12   3  184.85   32.56
   1  12  -3  131.08   23.67
  -1 -12   3  144.29   28.40
  -1  12   3  159.47   28.85
   1 -12  -3  122.75   17.14
   1 -12   3   95.49   16.51
  -1  12  -3  116.97   21.71
   3  -2   4  242.99   34.70
   3   2  -4  260.67   33.06
   3  -2  -4  269.74   30.92
  -3   2  -4  232.74   32.17
  -3  -2   4  279.92   37.38
   3   2   4  225.15   33.51
   3  -2  -4  274.95   34.64
   3   2  -4  303.99   39.01
  -3   2   4  351.61   48.32
  -3  -2  -4  225.27   31.26
   4 -13  -2  237.54   33.69
  -4 -13   2  198.84   31.22
   4  13   2  210.80   28.31
  -4  13  -2  272.58   39.35
  -4  13  -2  225.63   30.20
   4  13   2  250.70   32.00
  -4 -13  -2  223.25   29.13
   4  13  -2  201.23   33.77
   1  15  -2   73.11   17.90
   1 -15   2   79.47   22.03
  -1  15  -2   87.21   22.13
   1 -15  -2   74.15   17.33
  -1 -15  -2   93.40   20.13
   1 -15  -2   67.13   13.89
  -1 -15   2  105.11   25.60
   1  15   2   68.29   18.05
   1  15   2  100.20   22.45
  -1  15   2   92.72   22.99
   1 -17   0  157.71   22.85
  -1  17   0  229.71   37.14
  -1 -17   0  165.26   25.88
  -1  17   0  192.02   25.78
   1  17   0  210.64   33.86
   3  14  -2   54.87   16.32
  -3  14   2  112.85   28.84
   3 -14  -2   67.83   18.20
   3  14   2   82.69   18.84
  -3 -14   2   78.16   20.10
  -3  14  -2   70.62   18.00
  -3 -14  -2   77.65   17.26
   3  14   2   92.29   20.66
  -6  -4  -3  162.05   29.70
   6  -4   3  118.40   26.54
  -6   4  -3  110.36   22.99
   6  -4  -3  129.07   26.12
  -6   4   3  145.76   29.23
   6   4   3  126.95   28.37
  -6  -4   3  130.81   21.44
  -6  -4   3  154.05   26.96
   6   4  -3  122.30   27.36
  -1   6   4  228.30   42.54
   1   6  -4  175.12   29.72
   1  -6  -4  165.37   23.21
   1  -6   4  132.52   22.29
   1   6   4  201.33   38.12
  -1  -6  -4  147.95   24.15
  -1  -6   4  164.57   27.05
  -1   6  -4  176.85   29.96
   1   6  -4  135.99   22.02
   1  -6  -4  154.81   22.46
  -2  -5  -4  141.20   23.91
   2  -5  -4  204.04   26.94
   2   5  -4  161.41   28.15
   2   5   4  176.24   30.66
   2  -5  -4  157.56   23.49
  -2   5   4  247.96   42.55
   2   5  -4  157.77   25.24
  -2  -5   4  209.07   32.10
  -2   5  -4  179.17   30.68
   2  -5   4  143.20   24.00
   6 -12   1   -8.41   15.69
   6  12  -1    2.21    6.52
   6  12   1   -2.20    7.49
  -6 -12  -1    8.48    9.45
  -6  12  -1   -2.75    8.82
  -6  12   1    6.76   16.01
  -6 -12   1    4.58    8.22
   6 -12  -1   10.87   12.52
  -6  12  -1   14.41    9.39
  -7  -7   2   90.72   21.80
   7   7   2   41.63   13.16
  -7  -7  -2   62.58   15.11
  -7   7   2   84.81   22.42
  -7   7  -2   72.07   17.89
   7   7  -2   95.85   24.67
   7  -7  -2   94.25   21.84
  -3   3   4   14.18   17.59
   3   3  -4  -11.21    7.98
   3  -3   4    4.99   12.34
  -3   3  -4   20.62   14.18
   3   3  -4    4.74   12.32
  -3  -3   4   54.57   21.53
   3   3   4    7.49   11.12
   3  -3  -4   10.47   11.19
  -3  -3  -4    9.88   10.49
   3  -3  -4   28.33   14.08
  -3  11   3  556.12   56.37
   3  11  -3  538.82   55.13
  -3  11  -3  466.33   48.35
   3 -11   3  459.53   43.68
   3  11   3  521.33   50.78
  -3 -11   3  529.42   55.26
  -3  11  -3  411.31   35.61
  -3 -11  -3  555.43   48.45
   3 -11  -3  543.37   49.57
  -6 -10   2   34.47   13.63
   6 -10  -2   80.34   21.58
  -6  10   2   67.97   22.79
   6  10   2   65.27   15.55
   6  10  -2   48.57   16.65
  -6 -10  -2   71.39   16.90
  -6  10  -2   51.51   19.75
  -6  10  -2   45.35   14.22
   6  10   2   45.50   11.68
   6 -10   2   57.84   15.26
  -7  10  -1   64.66   24.23
   7  10  -1   70.76   18.68
  -7  10   1  107.76   28.57
   7 -10   1   67.59   18.87
  -7 -10   1   66.41   16.49
   7 -10  -1   77.26   24.06
  -7 -10  -1   89.43   18.38
   7  10   1   74.79   14.92
   7  10   1   81.39   15.74
   5   8  -3  170.62   30.81
   5  -8   3  146.85   29.50
   5  -8  -3  167.56   27.89
   5   8   3  123.00   22.61
  -5   8   3  186.08   34.02
  -5  -8  -3  107.85   20.37
  -5   8  -3  146.09   26.38
  -5  -8   3  186.73   32.58
  -4 -15  -1   19.25   11.48
   4 -15  -1   23.64   11.99
   4  15  -1   11.07    9.09
   4  15   1   -5.01    9.09
  -4  15   1    8.88   10.56
  -4  15  -1    9.11    9.57
   4 -15   1   22.87   12.47
  -4 -15   1   -2.75    9.83
   5  12  -2  138.70   27.77
  -5 -12  -2  130.49   22.08
  -5  12  -2  220.13   38.03
   5  12   2  141.85   22.11
  -5 -12   2  134.81   25.79
  -5  12   2  230.31   40.88
   5 -12   2  159.60   28.47
   5  12   2  159.73   24.31
  -5  12  -2  157.76   27.53
   5 -12  -2  177.56   29.70
   2 -12  -3   -8.57    8.83
   2  12   3   -9.14    8.99
  -2 -12  -3   -2.37    9.74
  -2  12   3   -3.96   13.55
  -2 -12  -3   -6.95    8.59
   2  12  -3    7.10    9.19
   2 -12   3  -12.49    9.46
  -2  12  -3  -10.76   10.15
  -2  12  -3   -4.55   10.55
  -2 -12   3   16.15   13.68
   9   0   0  -10.67    8.19
  -9   0   0    1.14    7.02
  -9   0   0   -4.78    6.17
  -8   0  -2   55.80   20.46
   8   0  -2   51.09   20.63
  -8   0   2   42.54   18.30
   8   0   2   30.64   15.97
  -6  -5   3  238.36   27.96
   6  -5   3  273.21   40.69
   6   5  -3  299.44   41.98
   6  -5  -3  248.53   34.37
  -6  -5  -3  235.39   31.93
   6   5   3  198.18   28.02
  -6   5   3  311.20   42.48
  -6   5  -3  265.32   36.90
  -6  -5   3  271.73   36.11
  -4  10   3  111.98   26.23
  -4 -10   3   67.43   20.21
   4  10  -3  101.37   24.60
  -4 -10  -3   68.67   16.20
  -4  10  -3   76.35   21.16
   4 -10  -3  100.13   22.02
   4 -10   3  114.07   25.99
   4  10   3   66.21   17.37
  -8   8   0  493.98   58.75
   8   8   0  588.73   45.15
   9  -1   0  104.30   26.73
  -9   1   0  106.40   22.14
   9   1   0   98.53   25.95
  -9   1   0  142.49   26.79
  -9  -1   0  135.80   26.74
  -9  -1   0  136.09   25.63
   0   7  -4  -13.92   13.87
   0  -7  -4    7.62    6.47
   0   7  -4   -1.31    5.23
   0  -7   4    4.42    9.41
   0   7   4   -4.24   10.21
   0  -7  -4    8.11    7.99
   8   1   2  104.52   21.17
   8   1  -2  161.34   30.15
  -8  -1   2  159.91   26.04
   8  -1   2  154.14   27.51
  -8  -1  -2  188.48   30.07
  -8   1   2  158.44   26.24
  -8   1  -2  167.59   30.13
   8  -1  -2  154.29   29.15
  -6 -13   0   73.12   18.91
   6  13   0   46.64   12.88
   6 -13   0   44.05   18.08
  -6  13   0   47.95   20.50
  -2  15   2  118.22   28.28
  -2 -15   2   99.71   23.16
   2 -15  -2   88.55   19.55
  -2 -15  -2  101.52   20.09
   2  15  -2   67.30   17.34
   2  15   2  102.51   21.59
   2 -15   2  115.35   25.13
   2 -15   2  121.41   26.37
   2  15   2   76.15   18.67
  -2  15  -2  126.41   27.02
   8   7  -1   72.98   19.79
  -8  -7  -1   51.32   13.58
  -8   7  -1   25.64    8.97
  -8  -7   1   55.37   16.85
  -8   7   1   53.97   19.10
   8   7   1   56.53   13.38
  -8   7  -1   49.13   21.70
   8  -7  -1   44.73   15.86
   8  -7   1   57.02   15.12
   8   7   1   63.09   13.97
   7  11   0  400.53   37.63
   7 -11   0  405.02   50.18
  -7  11   0  346.90   49.58
   3  -4   4   15.86    8.23
   3  -4  -4   17.04   10.41
   3  -4  -4   40.56   13.91
   3   4  -4   19.51   10.15
  -3  -4  -4   19.28    8.85
   3   4   4   23.76   14.04
  -3   4  -4   21.77   11.34
  -3  -4   4   49.54   18.84
  -3   4   4   59.58   22.85
   3   4  -4   48.32   17.71
   2  17   0  184.88   30.30
   2 -17   0  145.06   21.51
  -2  17   0  158.86   24.28
  -2 -17   0  170.92   28.54
  -2  17   0  216.93   36.00
   0  17   1  317.81   34.53
   0 -17  -1  310.08   34.32
   0  17  -1  316.27   42.71
   0 -17   1  273.52   34.24
   0  17   1  257.66   38.48
   5 -14   1   93.45   23.40
   5 -14  -1   69.97   19.80
  -5  14  -1   75.95   22.51
  -5  14   1  116.65   29.29
  -5 -14   1   54.77   15.45
   5  14   1   65.58   16.87
   5  14  -1   61.08   16.68
  -5 -14  -1   65.89   16.47
   2   6  -4   41.95   15.60
  -2  -6   4   29.55   12.81
   2   6   4   34.51   13.77
   2  -6  -4   45.59   13.29
   2  -6  -4   26.25    6.50
   2   6  -4   41.07   14.92
  -2   6  -4   49.87   16.42
  -2  -6  -4   26.45    8.65
  -2   6   4   52.73   22.52
   2  -6   4   29.55   14.87
   3 -16   1   51.50   13.63
   3 -16  -1   39.66   14.77
  -3  16  -1   38.67   14.62
  -3 -16  -1   60.14   17.82
   3  16   1   51.48   16.68
  -3 -16   1   30.17   12.52
  -3  16  -1   55.52   17.11
  -3  16   1   48.53   16.75
   3  16  -1   29.56   11.49
  -9  -2   0  404.44   41.42
  -9   2   0  380.14   39.80
  -9  -2   0  387.37   42.26
   9  -2   0  301.21   41.74
   9   2   0  358.18   46.00
  -9   2   0  317.82   41.01
   8   2  -2   48.85   19.81
  -8   2   2   14.25    7.93
   8   2   2   22.57   12.69
   8  -2  -2   24.95   13.24
  -8  -2   2   44.74   17.15
  -8  -2  -2   46.49   15.96
   8  -2   2   42.90   16.63
  -8   2  -2   41.62   19.96
   1  -7  -4  244.36   28.64
  -1  -7   4  176.04   27.78
   1   7  -4  181.80   24.96
  -1   7  -4  264.49   37.28
   1   7   4  262.32   40.36
  -1  -7  -4  234.96   30.01
   1  -7  -4  212.16   26.61
   1  -7   4  202.99   28.12
   1   7  -4  227.58   34.60
  -1  17  -1    8.01   10.53
  -1 -17   1   18.80   13.75
   1  17   1    7.33    8.85
  -1 -17  -1   20.93   11.11
   1 -17  -1   -2.83   10.37
   1 -17   1    8.18    9.33
  -1  17   1    7.60    9.77
   1  17  -1   26.74   15.55
  -1  17   1    5.03    7.56
   7  -8   2   73.91   15.90
   7   8   2   66.48   14.90
  -7   8   2  117.96   27.03
   7  -8  -2   70.53   17.57
  -7   8  -2   77.21   17.07
   7   8  -2   77.72   20.57
  -7  -8  -2   61.83   14.56
  -7  -8   2   68.71   17.04
  -9  -3   0  211.73   31.87
  -9   3   0  160.85   30.80
   9  -3   0  133.70   28.38
   9   3   0  188.23   33.82
  -9  -3   0  205.71   27.90
   8   3   2   26.67   11.90
   8  -3   2   46.36   17.75
  -8   3  -2   53.99   19.22
   8   3  -2   45.84   17.72
  -8  -3  -2   39.33   15.98
  -8   3   2   56.97   19.27
   8  -3  -2   19.44   13.38
  -8  -3   2   47.10   15.28
  -8  -3   2   59.41   16.75
   0  13   3  287.26   39.37
   0 -13  -3  244.50   31.81
   0 -13  -3  239.28   27.82
   0  13  -3  221.04   30.14
   3   5  -4   81.37   19.55
  -3   5   4  121.31   31.71
   3  -5  -4   76.00   15.11
  -3  -5   4   92.14   22.14
   3   5   4   73.90   21.14
   3  -5  -4   71.31   16.61
  -3   5  -4   64.57   17.62
  -3  -5  -4   81.83   20.76
   3  -5   4   89.37   21.31
  -6  -6  -3   51.08   13.84
  -6  -6   3   38.00   13.22
   6   6  -3   80.05   25.34
  -6   6  -3   84.63   22.47
   6  -6  -3   76.31   18.67
  -6   6   3   72.01   23.02
   6  -6   3   83.10   24.57
   6   6   3   38.74   12.16
  -4   0   4  541.87   55.85
  -4   0  -4  401.00   44.21
   4   0  -4  408.67   44.90
   4   0   4  383.41   47.70
  -4  -1  -4  139.98   28.08
  -4   1  -4  137.47   30.67
   4  -1  -4  139.37   31.05
   4   1   4  102.35   23.54
   4  -1  -4  122.08   24.21
   4  -1   4  155.96   35.74
  -4   1   4  169.78   32.83
   4   1  -4  136.08   31.18
  -4 -16   0   89.46   21.96
  -4  16   0   81.58   18.39
   4  16   0   50.15   15.11
   4 -16   0   85.88   24.92
  -1 -13   3   15.68   13.83
  -1  13  -3    5.58    8.26
   1 -13  -3   12.32   11.28
  -1 -13  -3   10.75    9.77
  -1 -13  -3   19.44   10.90
   1  13   3    8.61   10.60
  -1  13   3   17.82   11.51
  -1  13  -3   12.80   11.27
   1 -13  -3    0.68    5.54
   1 -13   3   -0.98    5.44
   1  13  -3   12.44   10.70
   5   9   3   -2.55    6.02
  -5  -9   3    0.30    8.31
  -5   9   3  -24.43   18.42
  -5  -9  -3    7.78    7.70
   5   9  -3   -7.12   13.32
   5  -9   3   -7.81   13.34
   5  -9  -3   11.40    8.86
  -5   9  -3    9.32   12.60
  -4   2   4   29.07   18.67
   4  -2   4   36.37   19.87
   4   2   4   18.77   18.02
  -4  -2   4   26.53   12.31
   4   2  -4   -2.66   12.55
   4  -2  -4   14.38   10.51
  -4  -2  -4   33.47   16.40
  -4   2  -4   28.20   16.23
   4  -2  -4    9.17   14.26
  -9   0   1   -6.31    8.84
   9   0  -1    2.20   11.13
  -9   0  -1    6.60    9.40
   9   0   1  -10.19   10.81
  -9  -4   0   35.32   12.75
  -9  -4   0   25.90   11.81
   9   4   0   38.97   15.52
  -9   4   0   19.68   13.61
   9  -4   0   25.66   14.12
   2  -7  -4    1.87    7.74
  -2   7   4   10.15   12.46
   2   7  -4   17.78   14.06
  -2   7  -4   12.31    7.83
   2  -7  -4   15.68    7.76
   2   7  -4   14.36   10.19
  -2  -7  -4   24.99   11.56
   2   7   4   -1.32   10.32
   2  -7   4   20.37   13.48
  -2  -7   4   -4.36   10.53
   0  -8  -4   10.47    7.84
   0   8  -4   18.46    8.24
   0   8  -4   14.83   12.28
   0   8   4   27.94   14.83
   0  -8   4   18.98   10.93
   0  -8  -4   21.48    6.33
  -5  15   0  923.60   71.34
  -5 -15   0  901.15   65.98
   5 -15   0  977.51   77.72
  -8  -4  -2   54.21   19.87
   8   4  -2   43.23   18.05
  -8   4   2   30.25   14.93
  -8  -4   2   29.55   14.05
  -8  -4   2   34.57   12.26
   8  -4   2   42.57   20.04
   8   4   2   32.73   13.90
  -8   4  -2   34.02   15.89
   8  -4  -2   29.62   17.35
   8   8   1  252.48   26.77
   8   8   1  254.79   27.02
   8  -8  -1  171.46   31.66
   8  -8   1  185.31   28.76
  -8   8   1  203.42   35.99
  -8  -8   1  194.05   31.45
   8   8  -1  269.79   34.86
  -8  -8  -1  255.98   31.42
  -8   8  -1  221.84   42.25
  -6  11  -2  117.26   31.12
  -6  11  -2  119.48   25.23
   6  11   2   72.56   17.12
   6  11   2   86.98   18.40
   6 -11   2   71.22   17.40
   6 -11  -2  111.97   25.44
  -6 -11  -2   97.03   19.83
  -6 -11   2   68.09   18.35
   6  11  -2  101.74   25.91
  -9   1  -1   78.97   20.50
  -9  -1   1   72.57   20.02
  -9   1  -1  101.91   23.99
   9  -1   1   69.19   19.43
  -9  -1   1   76.59   18.78
  -9  -1  -1   71.59   17.72
   9  -1  -1   58.78   19.18
  -9   1   1   87.39   22.38
   9   1  -1   72.26   20.52
   9   1   1   44.40   15.58
  -6 -13   1  259.45   34.55
  -6  13  -1  297.94   45.71
  -6 -13  -1  418.24   45.07
   6  13   1  218.91   28.11
   6  13  -1  282.56   34.86
   6 -13  -1  338.12   45.02
   4  14   2  160.17   26.61
  -4 -14   2  113.12   25.17
   4  14  -2  119.03   25.52
   4  14   2  107.67   19.69
  -4  14   2  159.44   32.79
   4 -14  -2  132.16   27.21
  -4  14  -2  127.79   24.39
  -4 -14  -2  127.32   22.78
  -4  14  -2  178.83   33.52
   0 -16   2  112.58   27.32
   0 -16  -2   92.69   18.57
   0  16   2   89.01   21.90
   0  16   2  115.68   25.00
   0  16  -2  100.61   24.14
  -7 -11  -1  355.89   38.44
  -7 -11   1  190.28   28.06
  -7  11  -1  278.75   45.19
   7 -11   1  232.20   34.80
   7  11  -1  254.51   33.73
   7  11   1  217.47   25.76
  -7  11   1  297.43   45.55
   7 -11  -1  250.37   41.34
   8   9   0  119.87   22.33
   8  -9   0   87.05   23.20
  -8   9   0  107.26   29.61
  -8  -9   0  151.78   26.12
   2  17  -1  106.98   23.48
  -2  17   1  135.75   26.43
  -2 -17  -1  117.39   24.70
   2  17   1  101.48   22.87
  -2  17  -1  121.90   26.31
  -2 -17   1  107.83   24.49
   2 -17   1   94.02   20.28
   3 -12  -3    3.93    9.11
  -3 -12   3   19.59    8.39
  -3 -12  -3   47.50   17.08
  -3  12  -3   22.76    8.49
   3 -12   3    7.46    7.41
   3  12   3   29.20   13.06
  -3  12  -3   30.67   13.89
   3  12  -3   28.75   14.24
  -3  12   3   22.94   15.57
   1   8  -4   53.21   17.57
   1  -8  -4    7.76    5.42
  -1  -8  -4   31.71   13.58
   1  -8  -4   34.02   11.41
  -1  -8   4   15.12    9.86
   1   8  -4   21.70   12.21
   1  -8   4   -0.11    7.02
  -1   8  -4    9.21   11.83
   1   8   4   25.97   15.17
  -1   8   4   42.04   20.35
   9   2   1  109.25   25.85
   9  -2  -1  126.53   27.08
  -9   2  -1  125.34   28.32
  -9   2   1  135.38   27.80
  -9  -2   1  114.94   23.02
  -9  -2  -1  150.16   27.03
   9   2  -1  140.33   29.40
   9  -2   1  127.41   29.51
  -9   2  -1  167.21   28.74
  -9  -2   1  138.52   23.82
   9   2   1  114.36   24.59
   3 -15  -2  -11.92   11.06
   3  15   2    2.52    6.58
  -3 -15   2    1.51    9.29
  -3  15  -2   -7.56   13.32
   3  15   2   12.85   11.59
  -3  15   2  -22.40   14.13
   3  15  -2   -6.19    7.52
  -3 -15  -2    0.66    6.65
  -3  17   0    0.52    7.96
   3  17   0    6.62    8.99
  -3 -17   0   -4.14    7.03
  -3  17   0    8.42    8.56
   3 -17   0   -9.45    7.20
  -4  -3  -4   79.21   19.54
  -4   3  -4  111.31   24.59
  -4   3   4  146.28   33.01
   4  -3   4   99.66   24.41
   4   3  -4  104.68   24.80
   4  -3  -4   79.81   17.30
   4   3   4  110.46   26.77
   4  -3  -4   95.20   22.61
  -4  -3   4  112.23   24.06
   1 -16  -2   19.75   10.30
  -1 -16  -2   17.76   10.55
   1  16  -2    5.54    8.40
   1  16   2   27.39   13.39
  -1 -16   2   31.71   16.49
   1 -16  -2   13.02    6.59
   1  16   2   41.77   17.20
  -1  16   2   18.11    8.38
   1 -16   2   12.92   11.69
  -1  16  -2   20.31   15.91
  -4 -11  -3  120.09   22.80
   4 -11  -3  144.52   26.44
  -4 -11   3  134.83   28.65
   4  11  -3  118.43   28.33
   4 -11   3  138.14   28.66
   4  11   3  149.41   26.19
  -4  11   3  154.31   29.85
  -4  11  -3  123.27   27.03
  -3  -6   4  101.16   21.98
   3   6   4  119.49   26.04
   3  -6   4  116.70   22.67
   3  -6  -4  123.58   21.33
  -3  -6  -4  151.22   27.43
  -3   6  -4  127.18   27.41
   3   6  -4  133.28   26.31
   0  18   0  156.11   30.80
   0 -18   0  106.42   20.62
  -7   0   3   30.46   14.71
   7   0   3    7.30   13.16
   7   0  -3   27.10   18.25
  -7   0  -3   11.91   15.23
   5  13  -2   35.88   16.92
   5 -13   2   26.18   14.42
   5  13   2   36.87   14.29
   5  13   2   26.55   13.44
  -5  13  -2   48.75   19.98
  -5 -13  -2   13.65   10.44
  -5 -13   2   15.24   11.35
   5 -13  -2   20.88   10.96
  -5  13  -2    9.74   10.49
  -5  13   2   13.07   11.15
   6  -7  -3   38.53   13.45
  -6   7  -3   22.38    8.34
  -6  -7   3   49.22   19.18
   6   7  -3   30.68   14.63
   6  -7   3   32.54   17.25
   6   7   3    4.11   10.01
  -6  -7  -3    4.97    8.31
  -6   7   3   53.79   20.53
  -7   1  -3   97.81   24.41
  -7  -1   3   86.83   20.89
   7   1   3   83.24   24.17
   7  -1   3   72.48   22.07
  -7  -1  -3   70.58   20.62
   7  -1  -3   83.67   23.10
   7   1  -3   91.77   25.05
  -7   1   3   96.53   24.48
  -7  12   0  217.49   38.96
   7 -12   0  238.59   37.94
   7  12   0  195.83   26.64
  -7 -12   0  264.09   36.49
   2  13   3   82.89   24.45
   2 -13  -3   69.88   18.38
  -2 -13  -3   57.00   14.70
  -2 -13  -3   75.73   18.90
  -2  13   3   67.99   21.48
   2 -13   3   19.86    8.45
  -2 -13   3   65.37   22.41
   2  13  -3   58.68   17.71
  -2  13  -3   42.26   16.12
  -2  13  -3   78.85   24.15
   9   3   1  330.91   38.29
   9   3   1  303.86   33.22
   9  -3  -1  278.27   40.04
  -9  -3   1  307.57   36.44
  -9   3  -1  289.30   41.74
  -9   3  -1  374.97   42.48
   9  -3   1  309.52   41.98
   9   3  -1  373.78   46.55
  -9  -3   1  324.94   38.65
  -9  -3  -1  356.80   41.51
  -9   3   1  286.72   38.53
  -9   5   0   11.83   12.50
   9   5   0   44.23   15.61
  -9  -5   0   54.86   18.94
   9  -5   0   36.70   16.79
   8   5   2  223.37   29.48
  -8  -5   2  296.23   33.38
   8   5  -2  273.78   40.34
   8  -5  -2  257.38   37.04
  -8  -5   2  267.73   33.82
  -8   5  -2  301.41   39.17
  -8  -5  -2  258.79   34.16
  -8   5   2  285.55   41.00
   7  -9   2    0.29    6.94
   7   9   2   -3.72    7.59
  -7  -9   2   -6.93    6.19
   7   9   2    0.33    6.15
  -7   9  -2   16.82   11.80
   7  -9  -2   13.99    8.25
  -7   9  -2  -10.79   14.51
  -7  -9  -2   -3.14    7.53
   7   9  -2   16.02   10.99
  -7   9   2  -17.98   21.40
   1  18   0  198.97   32.30
  -1 -18   0  207.83   29.97
   1 -18   0  172.34   23.91
  -1  18   0  260.12   39.97
  -7   2  -3  100.98   24.77
   7  -2  -3   83.77   22.44
   7  -2   3   71.61   21.01
  -7  -2   3   85.70   19.71
  -7   2   3   95.53   24.19
  -7  -2  -3   87.17   23.40
   7   2   3   55.69   17.36
  -7  -2   3   73.31   17.60
   7   2  -3  108.89   27.05
   4   4   4   93.81   21.94
   4   4  -4  142.48   30.28
  -4   4   4  165.29   35.46
   4  -4  -4  125.96   25.90
  -4  -4  -4  103.16   22.95
   4  -4   4  113.90   26.20
  -4   4  -4  106.72   23.20
  -4  -4   4  134.72   26.34
  -6  14   0  214.82   38.12
   6 -14   0  217.39   37.24
   6  14   0  135.73   22.61
  -6 -14   0  195.73   31.57
  -4 -16   1    3.78    7.36
  -4  16   1   13.05    9.98
   4  16  -1    2.53    5.97
  -4 -16  -1    7.82    7.97
   4 -16  -1   -7.02   10.96
  -4  16  -1    2.57    9.90
   4 -16   1   -7.45    9.79
   4  16   1   14.55   10.01
  -2   8  -4  228.29   36.15
   2   8  -4  204.44   33.70
  -2  -8  -4  201.70   29.92
  -2   8   4  263.73   43.29
   2  -8  -4  201.86   29.00
   2   8  -4  205.10   31.25
   2  -8  -4  188.11   23.45
  -2  -8   4  226.92   31.78
   2  -8   4  206.67   29.14
   2   8   4  201.83   34.58
   9  -4   1   83.26   23.64
  -9  -4  -1  100.91   22.55
  -9   4  -1   66.04   17.45
  -9   4   1   86.19   24.12
   9   4   1   86.68   18.05
  -9   4  -1   39.34   17.91
   9   4  -1  107.40   31.21
  -9  -4   1   47.76   15.21
   9   4   1   85.34   19.12
  -9  -4   1  123.69   24.75
   9  -4  -1  100.87   26.45
  -5  15   1    8.73   16.80
   5 -15  -1    4.98   11.11
  -5  15  -1   16.25   14.88
   5  15  -1    4.29    7.40
   5 -15   1  -14.78   11.76
  -5 -15   1    9.10   11.90
   5 -15   1  -12.61    8.99
  -5 -15  -1   18.26   12.99
   5  15   1    4.94    9.65
   2 -16   2  107.48   22.78
   2  16  -2   91.16   19.89
  -2  16  -2  145.07   30.51
  -2  16   2  203.20   38.53
   2  16   2  109.45   21.48
   2  16   2  118.70   23.68
   2 -16   2  145.11   29.57
   2 -16  -2   99.48   21.83
  -2 -16   2  139.59   28.06
  -2 -16  -2  142.36   24.72
   7  -3   3   29.33   11.75
   7   3  -3   37.76   19.52
  -7   3   3   37.43   17.19
  -7   3  -3   66.59   22.85
   7  -3  -3   47.43   17.94
  -7  -3   3   61.41   19.57
  -7  -3  -3   57.54   18.60
   7   3   3   36.68   17.09
  -7  -3   3    6.18    9.10
   0   9  -4   11.29   14.02
   0   9  -4   -1.19    6.36
   0  -9  -4   -8.81   10.28
   0  -9  -4    6.21    7.91
   0  -9   4   14.64   11.02
   0   9   4  -16.49   15.81
   8  -9  -1   -1.18   10.41
  -8   9  -1    9.26   12.64
  -8   9   1  -16.72   16.84
  -8  -9  -1   10.19    8.29
   8   9  -1   -4.19    7.85
   8   9   1   18.61    9.72
   8  -9   1    6.11    7.97
  -8  -9   1  -20.38   13.19
   8   9   1    2.71    6.14
  -5 -10   3    6.92    9.68
   5  10   3   14.96    8.46
  -5 -10  -3   14.03    9.88
  -5  10   3   24.51   16.83
   5 -10  -3    0.37    7.46
  -5  10  -3   18.00   12.33
   5  10  -3    7.36   11.03
   5 -10   3   25.67   15.47
  -3   7  -4   -9.76   12.41
   3  -7  -4    7.07    8.32
  -3  -7   4   37.21   14.74
   3  -7   4   17.50   11.14
   3   7   4   17.89   13.44
  -3   7   4    6.87   15.26
   3   7  -4   13.08   11.67
  -3  -7  -4    0.36    8.61
  -9  -6   0   -0.45    8.92
   9   6   0    0.19    9.93
  -9   6   0   -5.08   11.47
   9   6   0   -6.71   11.05
   9  -6   0   12.24   10.41
   8   6   2  126.09   21.39
  -8   6  -2  192.03   30.68
   8   6  -2  168.27   32.91
   8  -6  -2  151.52   28.05
  -8  -6  -2  148.75   25.83
  -8   6   2  218.64   38.68
  -8  -6   2  182.10   29.57
   3 -17  -1  138.23   27.81
  -3  17  -1  165.65   29.35
   3 -17   1  130.12   22.56
  -3 -17  -1  152.87   29.33
   3  17   1  130.05   26.15
  -3  17   1  153.45   30.48
  -3 -17   1  109.81   23.12
   3  17  -1   99.25   20.74
  -3  17  -1  153.20   32.97
   8  10   0  515.02   43.42
   8 -10   0  403.43   48.98
  -8  10   0  370.24   51.87
   4   5  -4   94.26   24.38
  -4   5  -4   98.50   21.99
   4   5   4   76.33   20.59
  -4   5   4  149.53   34.08
   4  -5   4  112.09   26.83
  -4  -5   4   95.88   23.57
  -4  -5   4  111.34   27.88
  -4  -5  -4  100.80   24.50
   4  -5  -4   82.20   19.38
  -2  18   0   28.54   11.76
  -2 -18   0   37.91   14.41
   2 -18   0   -0.24    6.52
   2  18   0   43.46   16.06
  -2  18   0   45.09   20.14
  -1  -9   4  134.29   24.61
   1  -9   4  105.92   19.82
  -1  -9  -4  147.16   23.72
   1   9  -4  116.24   21.61
   1  -9  -4  148.24   23.83
   1   9   4  155.32   31.08
   1  -9  -4  113.31   18.43
  -1   9  -4   98.13   23.79
   1   9  -4  136.94   28.17
  -1   9   4  165.66   33.68
   0  14  -3    3.69    6.91
   0 -14   3  -10.49   13.24
   0  14   3    2.17    8.41
   0 -14  -3   -0.50    7.11
   0 -14  -3   -3.37    8.57
   0 -18   1  -19.24   11.42
   0  18   1   10.41   10.28
   0  18  -1  -11.34    8.87
   0 -18  -1  -15.95   12.40
  -6  -8  -3   12.42    7.56
  -6   8  -3   29.35   14.24
   6   8   3   14.75    7.29
  -6   8   3   23.52   10.80
   6   8  -3   18.87   12.24
   6  -8  -3   44.02   15.55
  -6  -8   3   38.72   14.75
   7   4  -3   83.22   24.71
  -7  -4   3   82.52   19.56
   7  -4   3   76.49   22.54
   7  -4  -3   67.21   20.29
  -7   4  -3  100.55   24.25
  -7   4   3   95.72   25.53
   7   4   3   91.84   24.69
  -7  -4   3   68.43   17.47
  -7  -4  -3   98.54   22.45
   6  12   2  -15.99   14.86
   6 -12   2   10.72    9.63
  -6  12   2   15.75   13.85
   6 -12  -2   18.63   13.91
   6  12  -2    6.67   10.41
  -6 -12  -2   18.96    9.28
  -6  12  -2   -1.00   10.63
  -6  12  -2   13.15    9.11
  -6 -12   2   -9.81   11.52
   6  12   2   -8.39   11.62
  -7 -12  -1  259.99   35.02
  -7  12   1  208.90   38.24
   7 -12  -1  205.99   36.40
  -7  12  -1  203.82   38.86
   7  12  -1  189.18   29.74
   7  12   1  155.80   22.27
  -7 -12   1  137.15   25.97
   7 -12   1  196.28   34.02
   1 -14  -3   22.19    9.74
  -1 -14  -3   64.24   16.89
  -1 -14  -3   30.10   12.90
  -1  14  -3   36.71   15.08
   1  14   3   51.36   17.78
  -1  14   3   54.05   20.36
  -1 -14   3   71.65   23.20
   1  14  -3   39.31   12.69
   9   5   1   85.09   20.10
  -9  -5   1   76.87   19.50
  -9   5   1   84.73   23.76
   9   5  -1  102.02   26.32
  -9  -5  -1   95.64   21.19
  -9   5  -1   87.48   20.91
   9   5   1   71.22   15.88
  -9   5  -1   65.07   21.22
  -9  -5   1   78.28   21.75
   9  -5  -1   65.86   20.09
   9  -5   1   67.93   19.46
   1 -18  -1  102.02   21.14
  -1 -18  -1  113.23   23.68
  -1  18   1  105.99   24.05
  -1 -18   1   80.72   20.46
  -1  18  -1  149.24   32.08
   1  18   1  138.14   28.73
   1 -18   1   97.94   22.68
   1  18  -1  103.25   25.31
  -1  18   1   84.06   19.25
  -3  13   3   97.52   24.62
   3 -13  -3   92.95   21.79
  -3 -13   3   90.55   25.99
  -3  13  -3   83.00   23.91
   3 -13   3   79.31   19.55
  -3 -13  -3   83.21   20.00
   3  13   3   78.88   22.33
  -3  13  -3   86.54   19.21
   3  13  -3  102.35   26.12
  -6 -14  -1  163.98   29.41
   6  14   1   78.24   16.35
   6 -14   1  133.29   28.72
   6  14  -1  121.29   24.48
  -6  14   1  170.56   39.01
  -6  14  -1  139.64   29.89
   6 -14  -1  156.59   32.12
  -6 -14   1  114.53   24.03
  -7 -10  -2   21.11   10.59
   7 -10   2    0.85    6.86
  -7  10   2   22.01   15.72
   7 -10  -2   29.31   14.39
  -7  10  -2   34.52   19.16
   7  10  -2   23.02   14.25
   7  10   2   15.02    7.99
  -7  10  -2   29.60   11.92
  -7 -10   2   13.09    8.57
   7  10   2    3.10    7.03
   4 -12   3   30.63   16.27
   4  12  -3   30.56   13.61
   4 -12  -3   40.76   14.33
  -4  12  -3   35.00   15.30
   4  12   3   34.16   12.00
  -4 -12   3   22.89   12.60
  -4 -12  -3   24.99   12.64
  -4  12   3   24.03   14.08
  -5   0  -4   14.64   11.41
   5   0  -4   -3.10    9.82
  -5   0   4    4.02    8.89
   5   0   4   35.32   18.94
  -5   0   4   21.73   14.63
   4  15  -2  124.70   25.84
  -4  15  -2  157.29   28.37
   4 -15  -2  150.42   28.33
  -4 -15  -2  139.71   25.88
   4  15   2  174.49   29.34
  -4  15   2  203.73   38.80
  -4 -15   2  129.08   26.61
   4  15   2  136.58   24.12
   5   1   4   78.66   22.15
   5  -1  -4   58.90   18.72
   5  -1   4   49.43   20.19
  -5  -1  -4   83.09   23.46
  -5   1  -4   98.78   25.01
   5   1  -4   47.51   18.10
  -5  -1   4   64.64   19.05
  -5  -1   4   70.18   21.94
  -5   1   4   66.68   21.36
  -4  17   0    3.59    7.83
   4  17   0   10.27    8.10
   4 -17   0    9.60   10.07
  -4 -17   0   11.98    9.94
   5 -16   0  140.71   31.14
  -5  16   0  142.12   28.58
  -5 -16   0  155.55   28.40
   5  16   0   90.55   19.80
  -4  -6   4   81.25   20.02
   4   6   4   48.65   15.41
   4   6  -4   71.37   19.24
  -4  -6  -4   90.06   22.36
  -4  -6   4  112.71   26.77
  -4   6  -4   85.77   22.10
   4  -6  -4   77.72   17.30
   4  -6   4   87.43   20.64
  -4   6   4  120.59   31.45
  -2   9  -4  262.37   38.92
   2  -9  -4  280.10   34.08
  -2  -9  -4  270.70   35.18
   2   9   4  311.93   44.76
  -2   9   4  406.27   56.29
   2   9  -4  239.76   32.73
  -7  -5   3  147.61   28.13
   7   5  -3  133.57   30.14
  -7  -5  -3  136.87   25.89
   7   5   3  110.76   23.90
  -7   5  -3  171.59   31.12
  -7   5   3  139.64   31.15
   7  -5   3  153.22   33.25
   7  -5  -3  131.36   26.09
  -9  -7   0   -4.50    6.79
  -9   7   0    0.85   13.23
   9  -7   0    8.68   10.66
   9   7   0   -7.25   10.55
  -8   7  -2   36.64   14.18
   8  -7  -2   28.18   11.83
   8   7  -2   47.35   18.66
  -8  -7   2   60.16   18.94
  -8  -7  -2   38.71   12.77
  -8   7   2   53.11   19.73
   8   7   2   36.85   13.84
  -5   2   4   68.93   24.88
  -5  -2  -4   46.85   18.10
   5  -2  -4   47.66   19.63
   5  -2   4   34.69   18.03
  -5  -2   4   15.25   13.63
   5   2  -4   37.12   19.57
  -5   2  -4   36.90   16.71
   5   2   4   35.79   21.88
  -5  -2   4   45.11   15.56
   7  13   0  139.83   23.53
   7 -13   0  176.01   34.26
  -7  13   0  158.95   35.22
  -7 -13   0  192.58   32.34
   3   8  -4   94.41   24.10
  -3   8   4   87.13   26.63
   3  -8   4   58.22   18.46
   3  -8  -4   71.84   17.64
  -3   8  -4  106.42   26.55
  -3  -8  -4   85.46   21.39
  -3  -8   4   79.52   21.84
   3   8   4   71.10   19.42
   0  17   2   -0.59    8.03
   0  17  -2    4.53   12.34
   0 -17  -2   -0.33    6.14
   0 -17   2   13.57    8.83
   0  17   2  -10.24   11.97
  -5  14  -2    2.92   12.45
   5 -14   2   -2.06    9.52
  -5  14   2   -0.31   16.84
  -5 -14   2   25.07   14.47
  -5  14  -2    7.64   10.25
   5 -14  -2   15.01   11.37
   5  14  -2   12.66   11.59
   5  14   2    6.04    8.98
   5  14   2    8.27    7.02
  -5 -14  -2    6.34    9.93
  -3 -16   2  175.29   32.79
   3 -16   2  198.96   34.83
   3  16   2  171.39   30.05
  -3  16   2  238.27   40.22
   3  16  -2  141.98   27.56
  -3  16  -2  150.56   30.18
  -3 -16  -2  183.75   29.31
   3 -16  -2  158.05   29.07
   3  16   2  202.43   31.18
  -2  14  -3   44.29   18.73
   2  14  -3   31.63   13.36
   2 -14  -3   27.94   13.45
  -2 -14  -3   31.57   13.21
   2 -14   3   40.83   12.99
  -2 -14   3   40.93   21.10
   2  14   3   26.69   12.80
  -2  14   3   61.39   23.00
  -2  14  -3   35.45   14.40
   9   6  -1   19.61   14.20
  -9  -6  -1   26.81   12.38
   9   6   1   23.77   10.13
   9  -6   1   25.03   12.76
   9  -6  -1   23.27   13.99
  -9   6   1   24.41   11.78
  -9  -6   1   32.41   16.87
   9   6   1   19.05    9.88
  -9   6  -1   35.07   17.23
   0 -10  -4  223.83   29.96
   0  10  -4  267.48   40.13
   0  10   4  275.60   44.44
   0 -10  -4  233.51   28.16
   0  10  -4  165.14   24.19
   0 -10   4  168.81   26.74
  -8  10   1  112.91   28.69
   8 -10   1  110.67   23.50
   8  10   1  129.02   20.59
  -8 -10   1   99.50   23.86
   8  10  -1  127.36   25.61
  -8  10  -1  151.27   36.42
   8 -10  -1  103.97   25.62
  -8 -10  -1  161.80   26.64
  -2 -18  -1   30.07   13.28
  -2  18  -1   44.40   20.84
  -2  18   1   59.03   21.27
   2 -18   1   38.77   15.02
  -2 -18   1   32.97   16.01
   2  18   1   31.99   12.55
   2  18  -1   43.67   17.47
  -1 -17   2    9.19    9.04
   1 -17   2    7.57   10.16
  -1  17   2   30.59   15.90
  -1  17  -2   56.01   21.89
  -1 -17  -2   15.61   10.46
   1  17   2   48.46   21.27
   1  17  -2   28.22   13.22
   1 -17  -2   20.45    8.59
   1  17   2   18.78   11.23
   5   3  -4  135.94   27.99
  -5  -3   4  229.00   37.84
   5  -3  -4  139.20   27.94
  -5   3   4  196.35   37.63
   5   3   4  137.26   28.37
  -5  -3  -4  147.87   27.38
  -5  -3   4  153.18   30.58
  -5   3  -4  168.75   30.15
   5  -3   4  126.40   26.60
   5 -11   3   26.09   19.87
  -5 -11   3   24.04   13.73
  -5  11   3   33.61   20.04
   5 -11  -3   45.22   17.18
  -5  11  -3   34.64   14.35
   5  11   3   20.21    8.65
  -5 -11  -3   17.06    8.80
   5  11  -3   23.00   14.06
   3  18   0  158.42   28.75
  -3 -18   0  166.38   30.02
  -3  18   0  204.81   31.86
  -3  18   0  225.25   39.13
   1  10  -4   15.29   12.55
  -1  10   4   42.50   18.71
   1  10   4   22.47   15.86
   1  10  -4   15.47    9.24
   1 -10   4   27.63   12.09
   1 -10  -4    6.49    5.18
   1 -10  -4   27.56   13.03
  -1  10  -4   24.41   13.18
  -1 -10  -4    3.44    6.28
   6   9  -3  276.30   42.73
  -6   9   3  288.27   44.27
  -6   9  -3  265.95   37.13
  -6  -9  -3  191.62   28.39
   6  -9   3  294.63   50.11
   6   9   3  184.12   26.79
  -6  -9   3  231.09   36.30
   6  -9  -3  255.80   37.52
  -6 -15   0   16.04   11.00
   6 -15   0   13.93    9.14
   6  15   0    0.93    7.98
  -6  15   0   19.28    9.81
   8  11   0   -0.84    7.83
  -8  11   0   23.83   21.93
   8 -11   0    1.40   12.41
  -8 -11   0   25.90   11.99
   0  19   0  -18.05   14.67
   0 -19   0   -3.54    6.51
  -7  -6   3   91.34   21.34
  -7  -6  -3  108.20   22.08
   7  -6  -3  104.33   23.23
  -7   6   3  131.40   30.49
   7   6  -3  104.44   26.98
   7   6   3   73.88   18.41
   7  -6   3  117.67   29.23
  -7   6  -3  166.56   31.69
   4  -7   4   21.62   15.15
  -4   7   4   35.96   17.95
   4   7   4   17.58    7.32
  -4  -7   4   24.07   17.23
  -4   7  -4   34.79   14.69
  -4  -7  -4   10.89    7.79
   4  -7  -4   30.24   16.30
   4   7  -4   33.02   16.21
   5  -4   4   44.38   17.27
  -5  -4   4   71.38   21.76
   5   4   4   43.72   16.64
  -5  -4   4   75.04   21.78
  -5   4   4   58.99   20.02
  -5   4  -4   90.01   23.96
   5   4  -4   37.26   19.25
  -5  -4  -4   50.40   16.57
   5  -4  -4   46.67   18.72
   4 -17  -1  245.66   38.34
  -4 -17   1  220.48   33.26
  -4 -17  -1  254.47   37.23
   4  17   1  243.74   35.40
  -4  17  -1  289.39   42.52
   4  17  -1  208.63   30.65
   4 -17   1  224.93   29.45
  -1 -19   0   82.44   19.04
   1 -19   0   83.30   17.62
   1  19   0  109.93   25.59
  -1  19   0  150.86   33.41
   5 -16  -1   12.29   12.94
   5  16   1   -0.38   10.10
  -5  16  -1   17.33   16.85
   5  16  -1   -2.65    8.68
  -5  16   1   30.89   22.95
   5 -16   1   37.94   18.38
  -5 -16  -1    5.92    7.14
  -5 -16   1    8.36   10.02
  -9   0  -2   32.74   21.05
   9   0  -2   12.87   15.54
   9   0   2   12.77   11.18
  -9   0   2   47.00   21.02
   9   8   0   71.07   17.92
  -9   8   0   79.73   25.64
   9  -8   0   40.96   16.23
  -9  -8   0  103.16   24.59
  -8  -8   2   20.49   11.47
   8   8   2   -0.59    5.57
   8   8  -2   -3.34    7.89
  -8  -8  -2  -11.12    8.30
  -8   8   2   12.48   11.93
   8  -8  -2   -0.80   10.05
  -9   1   2  174.29   31.89
  -9  -1   2  153.67   27.25
   9   1  -2  183.65   33.94
  -9  -1  -2  178.09   34.80
  -9   1  -2  233.43   38.08
   9   1   2  144.40   28.59
   9  -1  -2  140.45   32.59
   9  -1   2  179.00   30.95
  -6  13  -2  174.07   37.47
   6 -13   2  185.90   34.96
  -6 -13   2  121.55   24.54
   6 -13  -2  214.59   35.89
  -6 -13  -2  149.40   25.91
   6  13   2  143.22   24.82
   6  13  -2  172.57   33.04
  -6  13  -2  166.85   30.08
   9  -7   1  373.13   41.61
   9   7   1  524.81   40.42
   9  -7  -1  422.72   49.82
  -9  -7  -1  628.96   53.01
   9   7   1  537.15   43.49
  -9   7  -1  474.28   62.95
  -9  -7   1  518.92   53.22
  -9   7   1  449.64   54.36
   9   7  -1  623.91   60.63
  -7  11  -2   52.25   22.93
  -7  11  -2   76.67   20.14
   7 -11   2   33.00   13.18
   7  11   2   23.39    9.79
   7  11   2   36.30   12.19
  -7 -11   2   36.10   15.27
  -7 -11  -2   36.16   11.88
   7  11  -2   53.95   18.20
   7 -11  -2   35.55   13.65
   2  17   2  425.78   47.18
  -2 -17   2  486.48   55.50
  -2  17   2  665.76   68.19
   2  17   2  559.89   52.15
   2 -17  -2  409.37   44.58
  -2 -17  -2  490.00   49.33
   2 -17   2  584.46   62.40
   2  17  -2  384.58   44.29
  -7  13  -1   46.40   19.17
   7  13   1   63.04   15.26
  -7  13   1   90.51   26.33
   7  13  -1   72.40   19.53
  -7 -13  -1  100.01   23.26
   7 -13   1   57.52   22.39
  -7 -13   1   57.71   17.99
   7 -13  -1   65.74   21.18
   0  15   3  151.75   30.62
   0  15  -3  128.08   26.19
   0 -15  -3  118.91   20.29
   0 -15  -3  125.81   23.28
   0 -15   3  145.98   32.52
   3  -9   4   12.51    8.38
   3   9  -4   11.64   10.16
  -3   9   4   15.88   12.67
  -3  -9   4   27.63   11.59
   3   9   4   50.75   18.96
  -3  -9  -4   55.44   20.83
  -3   9  -4   63.34   21.01
   3  -9  -4   44.49   15.85
   2 -10   4   17.42    8.56
   2  10  -4   16.01   10.20
  -2 -10  -4   44.73   16.77
   2  10   4   59.21   20.09
   2 -10  -4   23.19    8.91
  -2  10   4   32.95   15.43
  -2  10  -4   28.56   11.44
  -9  -2  -2  206.55   34.40
   9   2   2  154.07   26.24
   9  -2   2  187.78   32.54
  -9   2   2  167.74   29.12
  -9  -2   2  223.77   34.62
  -9   2  -2  255.78   39.89
   9  -2  -2  206.70   36.68
   9   2  -2  181.46   36.61
   4 -13  -3  306.97   41.52
  -4  13   3  345.42   49.92
   4 -13   3  291.67   43.34
   4  13   3  278.93   39.97
  -4 -13   3  267.93   41.68
   4  13  -3  293.28   43.62
  -4 -13  -3  272.66   35.51
  -4  13  -3  305.29   42.36
   1 -15   3  199.91   39.14
  -1 -15  -3  128.06   24.73
   1 -15  -3  130.77   24.70
   1  15   3  197.57   33.73
   1  15  -3  108.92   22.60
  -1 -15  -3  147.17   25.69
  -1  15   3  201.91   35.82
  -1 -15   3  148.71   34.13
  -1  15  -3  141.99   28.36
  -5   5   4   65.16   24.41
   5   5  -4   50.81   19.70
  -5  -5  -4   55.21   18.24
  -5  -5   4   37.11   13.73
   5   5   4   22.31   10.94
   5  -5   4   58.50   19.51
  -5  -5   4   58.30   21.53
  -5   5  -4   47.95   16.08
   5  -5  -4   41.61   15.72
  -3 -14  -3   -0.68    7.94
  -3  14  -3    2.27    8.31
   3 -14   3    0.83    7.47
  -3  14  -3   -3.56   10.46
   3  14   3  -10.16   17.18
  -3  14   3   19.13   17.67
  -3 -14   3    7.98   11.32
   3 -14  -3    4.84    9.46
   3  14  -3   10.56   11.19
 -10   0   0  103.88   25.55
 -10   0   0  124.60   26.45
  10   0   0   94.57   31.56
   3 -18  -1    6.93   10.88
  -3  18   1   10.41   12.63
   3  18   1    0.83    8.13
   3  18  -1    5.35    6.31
   3 -18   1    6.03    9.31
  -3 -18   1   25.11   13.72
  -3 -18  -1   17.60   13.22
  -3  18  -1   20.69   15.89
 -10  -1   0  290.40   38.94
 -10   1   0  260.33   40.36
  10   1   0  244.65   40.87
  10  -1   0  249.31   40.11
 -10  -1   0  271.97   38.67
  -9   3  -2   43.97   18.88
   9  -3  -2   44.53   19.85
  -9  -3  -2   44.01   18.48
   9  -3   2   26.24   14.83
   9   3   2   47.46   16.33
   9   3  -2   48.84   22.63
  -9   3   2   54.53   20.89
   7  -7  -3   20.17    9.35
   7   7   3   14.41   11.02
  -7   7   3   50.48   22.08
  -7  -7   3   28.59   13.41
  -7   7  -3   25.76   12.89
  -7  -7  -3   22.79   12.10
   7  -7   3   50.30   24.31
   7   7  -3   26.57   12.75
   6 -15   1  107.95   28.61
  -6  15   1  125.37   31.95
  -6 -15  -1  101.91   25.01
  -6 -15   1   63.10   18.29
   6 -15  -1  146.81   32.44
  -6  15  -1  108.02   25.97
   6  15  -1   84.35   20.38
   6  15   1   75.47   18.60
   0 -11  -4   -9.28   11.20
   0  11   4  -22.07   14.97
   0  11  -4   -0.48    6.48
   0 -11  -4   -3.66    6.89
   0  11  -4  -25.85   17.95
  -8 -11  -1   -9.40   12.64
   8  11   1   -1.79    8.30
  -8 -11   1    6.59   10.29
   8 -11  -1    3.97    9.47
   8  11  -1    1.14    7.07
  -8  11   1   16.71   13.04
  -8  11  -1  -14.69   14.25
   8 -11   1  -22.04   17.14
   2 -19   0    0.78    7.43
  -2 -19   0   21.01   12.87
  -2  19   0   11.67   14.94
   2  19   0   -3.95   10.72
   0  19  -1   50.68   17.01
   0  19   1   73.95   22.89
   0 -19  -1   80.70   20.66
   0 -19   1   53.61   16.59
  10  -2   0   -2.65   22.92
 -10  -2   0   20.76   13.06
 -10  -2   0   20.57   13.80
  10   2   0   18.12   25.70
 -10   2   0    7.49   13.68
   6 -10  -3  127.31   25.08
   6  10   3  100.35   20.66
  -6 -10  -3  119.66   22.37
  -6  10   3  170.31   35.91
  -6 -10   3   86.81   21.71
  -6  10  -3  133.22   27.60
   6  10  -3  120.07   28.94
   6 -10   3  122.04   34.43
   4  -8  -4   71.84   21.09
   4   8  -4   35.63   14.43
  -4   8  -4   50.25   18.31
  -4  -8  -4   67.35   21.22
   4  -8   4   66.24   20.05
   4   8   4   41.40   14.35
  -4   8   4   84.57   26.40
  -4  -8   4   32.98   13.65
  -7  14   0    6.28   11.01
  -7 -14   0   25.40   10.70
   7  14   0   12.01    9.61
   7 -14   0   27.85   17.15
   1  11  -4   93.10   18.71
   1 -11  -4  143.40   25.80
  -1  11  -4  119.87   26.62
   1 -11   4   98.45   19.30
   1  11   4  192.74   41.47
  -1 -11  -4  115.45   21.00
  -1  11   4  176.31   39.13
   4 -16  -2  197.14   33.46
   4  16  -2  180.05   32.37
  -4 -16   2  181.92   32.38
  -4  16  -2  197.12   32.85
  -4 -16  -2  196.14   31.82
   4  16   2  222.39   34.35
  -5 -12  -3  144.59   26.98
   5 -12   3  211.88   43.11
   5  12  -3  186.85   38.27
  -5  12   3  221.84   41.00
   5  12   3  132.98   24.01
  -5  12  -3  170.36   32.05
  -5 -12   3  178.46   35.67
   5 -12  -3  203.26   33.74
   1  19   1   67.30   21.74
   1 -19   1   35.07   14.62
  -1  19   1   52.52   19.63
  -1 -19   1   33.42   13.77
   1 -19  -1   26.32   11.59
   1  19  -1   64.41   23.97
  -1  19  -1   53.44   21.76
  -1 -19  -1   45.41   16.24
   9  -4   2   30.62   18.83
  -9  -4   2   -4.29    9.96
  -9  -4   2   22.99   15.22
   9   4   2   24.36   14.85
   9  -4  -2   30.85   18.45
   9   4  -2   23.36   13.26
  -9   4   2    2.59   12.01
  -9   4  -2   63.33   22.18
  -9  -4  -2   56.18   20.97
   8   0   3  219.84   34.49
  -8   0   3  302.31   41.29
  -8   0  -3  328.98   43.53
   8   0  -3  295.56   45.01
   5 -15  -2  168.88   31.59
  -5 -15   2  133.51   26.44
  -5 -15  -2  136.73   26.53
   5  15  -2  144.99   28.54
  -5  15   2  239.54   43.35
  -5  15  -2  176.31   35.58
  -5  15  -2  160.85   30.44
   5 -15   2  178.07   34.21
   5  15   2  139.56   26.02
  10   3   0  502.25   56.70
  10  -3   0  335.38   45.18
 -10  -3   0  441.03   44.47
 -10  -3   0  535.08   53.66
 -10   3   0  384.46   49.83
   9   8  -1  349.40   45.86
  -9   8  -1  180.84   38.48
  -9  -8  -1  319.89   38.44
  -9   8   1  225.70   40.44
  -9  -8   1  251.86   38.03
   9   8   1  264.41   29.41
   9  -8   1  200.34   31.32
   9   8   1  252.78   28.45
   9  -8  -1  245.15   38.22
  -5 -17   0   44.39   17.70
   5  17   0   13.62   11.54
  -5  17   0    3.37   10.36
   5 -17   0   10.16   13.33
  -8   1  -3  112.63   31.85
   8   1   3   34.12   15.44
   8   1  -3   70.04   29.93
  -8  -1  -3   91.58   24.41
   8  -1  -3   75.54   26.15
   8  -1   3  106.33   29.75
  -8   1   3   56.18   19.63
  -8  -1   3   64.88   21.46
  -8  12   0   64.18   25.27
   8  12   0   47.29   14.83
   8 -12   0   37.81   17.26
  -8 -12   0   72.03   19.10
   2  15   3    1.14    9.49
  -2  15  -3   18.26   12.90
  -2 -15  -3   12.31   13.68
  -2 -15   3    9.66   14.01
   2  15  -3    8.75    8.80
   2 -15  -3    9.61    8.07
  -2  15   3   24.49   17.18
  -9   9   0   98.63   29.19
   9   9   0  158.41   26.30
   9  -9   0   93.80   25.81
  -8  -9  -2  221.07   31.52
   8  -9  -2  246.89   38.51
  -8   9  -2  188.69   27.85
  -8  -9   2  190.02   29.60
   8   9  -2  204.13   35.18
   8   9   2  151.06   22.76
  -5   6   4   70.16   26.33
   5  -6  -4   38.99   14.90
   5   6   4   32.76   16.49
   5   6  -4   51.74   21.17
  -5   6  -4   39.11   15.27
  -5  -6   4   31.02   17.18
  -5  -6  -4   37.96   17.23
   5  -6   4   39.82   21.72
  -4 -18   0   11.62   10.83
   4  18   0   -8.63   10.45
   4 -18   0  -14.25   14.54
  -4  18   0   27.12   16.56
   8  -2  -3    6.25   12.55
  -8   2  -3   41.07   21.49
  -8  -2  -3   33.92   16.72
   8  -2   3   23.76   15.19
  -8   2   3   38.69   17.48
   8   2  -3    8.63   15.67
   8   2   3   37.84   18.39
  -8  -2   3   27.01   15.00
  -3 -17  -2    7.31    8.58
   3 -17  -2    0.41    8.78
  -3 -17   2    7.96    8.99
  -3  17  -2    6.89   12.80
   3  17   2    7.99    9.57
  -3  17   2   -1.89   15.57
   3 -17   2  -27.13   17.21
   3  17  -2    9.87   10.22
   0 -18  -2   48.15   16.84
   0 -18   2   16.78   16.96
   0  18   2   41.70   19.92
   0  18  -2    5.21    8.40
  -3 -10  -4    4.85    9.35
   3  10   4   26.97   16.20
   3 -10   4   -3.79    8.39
  -3  10   4    7.95   15.18
   3 -10  -4   34.50   15.13
  -3  10  -4   32.63   16.75
  -3 -10   4   22.03   18.03
   3  10  -4   13.22   11.39
  -6   0   4  346.40   47.43
   6   0   4  289.06   43.10
  -6   0  -4  348.14   44.38
   6   0  -4  359.32   47.58
  10   0  -1   29.00   15.85
 -10   0  -1   28.97   16.25
  10   0   1   55.56   25.95
 -10   0   1   19.15   12.60
 -10  -4   0  293.88   39.88
 -10   4   0  158.49   32.18
  10  -4   0  181.05   33.28
  10   4   0  236.20   40.95
   6  -1  -4  108.15   29.34
   6   1  -4  125.70   33.06
   6   1   4   73.35   22.92
   6  -1   4  147.07   36.80
  -6   1  -4  142.71   32.84
  -6  -1  -4  110.18   27.34
  -6   1   4  156.56   34.50
  -6  -1   4  190.89   38.69
  -7  -8   3   79.52   22.78
   7  -8  -3  103.72   23.43
  -7   8   3  149.66   35.18
   7   8   3   81.41   19.97
  -7   8  -3  125.65   27.60
   7  -8   3  124.88   35.21
  -7  -8  -3   88.82   20.41
   7   8  -3   86.88   26.26
  10  -1  -1   23.92   17.38
  10  -1   1   35.72   24.34
 -10   1  -1   15.44   12.76
  10   1  -1   35.96   18.02
  10   1   1   29.32   19.08
 -10   1   1   26.48   16.58
 -10  -1   1   20.82   13.68
 -10  -1  -1    3.98   11.26
   2 -11  -4   21.97   15.03
   2 -11   4    9.59    9.09
   2  11   4   33.15   19.06
  -2 -11   4   58.30   23.74
  -2 -11  -4   30.09   14.67
  -2  11  -4   28.58   16.92
   2  11  -4    9.69   11.08
  -2  11   4   41.99   21.24
  -6 -16   0   -3.42    8.46
  -6  16   0   18.91   19.08
   6 -16   0    3.73   11.23
   6  16   0   15.68    9.47
  -7  12  -2   -6.38   11.90
   7 -12  -2   41.12   19.56
   7  12  -2   28.43   16.15
  -7  12  -2   23.16   16.40
   7 -12   2   33.63   16.61
  -7 -12   2   11.80   11.25
  -7  12   2   35.34   17.13
  -7 -12  -2    9.81   10.25
  -9  -5  -2  176.10   30.24
  -9  -5   2  150.43   27.65
  -9   5   2  201.81   36.57
   9  -5   2  179.06   37.03
   9   5   2  166.65   27.54
   9   5  -2  151.84   32.36
   9  -5  -2  175.43   31.28
  -9   5  -2  200.39   34.28
  -8   3   3   47.10   18.39
   8   3   3   87.76   24.12
  -8   3  -3   68.33   22.54
   8  -3  -3   63.96   22.72
  -8  -3  -3   62.78   20.01
   8   3  -3   58.61   21.06
   8  -3   3   63.02   22.43
  -8  -3   3   88.42   22.97
   1  18  -2   77.23   20.95
   1 -18   2   84.96   24.05
   1  18   2  115.74   28.02
   1 -18  -2   60.55   18.58
  -1 -18  -2   64.13   18.84
  -1  18  -2   84.38   24.93
   1  18   2   91.27   22.85
  -1  18   2   70.93   23.46
  -1 -18   2   61.12   22.27
  -2 -19   1   20.59   12.08
  -2  19  -1   16.31   14.41
  -2  19   1   40.55   15.98
   2  19   1   13.82    8.80
  -2 -19  -1   24.59   13.71
   2  19  -1   -2.12   12.25
   2 -19   1   20.88   10.27
  -6  -2  -4   46.22   19.29
  -6  -2   4   61.06   22.06
   6  -2  -4   33.04   21.25
  -6   2  -4   46.60   21.38
  -6   2   4   24.49   17.97
   6  -2   4   54.50   23.34
   6   2   4   47.34   23.76
   6   2  -4   32.95   20.93
 -10   2  -1   59.77   17.86
  10   2  -1   97.17   27.05
  10   2   1   76.32   21.66
  10  -2  -1   72.28   23.11
  10  -2   1   81.80   28.43
 -10   2   1   50.16   17.47
  10   2   1  108.11   29.26
 -10  -2   1   50.73   18.48
 -10   2  -1   78.01   23.02
 -10  -2  -1   91.98   22.71
  -6  14  -2   52.61   17.09
  -6  14  -2   52.71   21.02
   6 -14  -2   75.15   22.10
   6  14  -2   54.19   18.47
  -6  14   2   93.91   29.00
   6 -14   2   72.51   22.11
  -6 -14  -2   63.24   18.05
  -6 -14   2   57.46   18.60
   6  14   2   52.08   16.23
  -3 -19   0    0.32    7.89
   3  19   0  -12.03   12.16
  -3  19   0   10.90   11.33
   7 -14   1    6.62   11.23
   7  14   1   13.73    7.95
   7  14  -1   30.56   15.08
  -7  14   1   -5.55   14.25
  -7 -14  -1   20.88   14.00
   7 -14  -1   33.83   17.77
  -7 -14   1   14.54   10.91
  -7  14  -1  -15.81   16.48
   4   9   4   64.54   18.62
  -4   9   4  108.83   31.86
   4   9  -4  102.87   28.20
  -4  -9   4   79.18   23.97
  -4  -9  -4   79.30   21.73
  -4   9  -4   44.08   18.48
   4  -9  -4  102.29   24.94
   4  -9   4   46.67   13.62
  -5  -7  -4  110.91   25.88
   5  -7  -4  107.83   22.93
   5  -7   4  103.49   27.77
  -5   7   4  130.89   35.03
   5   7   4   60.11   16.63
  -5   7  -4  104.29   25.44
   5   7  -4  106.48   26.28
   0   0  -5   32.21   17.28
   0   0   5   21.70   21.15
  -6   3   4  208.77   40.31
  -6   3  -4  176.71   34.05
   6   3   4  128.59   31.92
   6  -3  -4  163.55   32.07
   6  -3   4  150.53   32.05
  -6  -3  -4  172.57   32.37
  -6  -3   4  180.17   31.64
  -6  -3   4  202.19   37.87
   6   3  -4  163.23   36.45
  -8   4   3  197.52   38.27
   8   4   3  128.42   24.61
  -8  -4  -3  171.57   30.70
   8  -4   3  169.26   34.11
  -8   4  -3  203.78   35.96
   8   4  -3  167.51   34.37
   8  -4  -3  180.12   32.98
 -10   3   1   53.07   21.82
 -10  -3   1    9.76   10.12
  10  -3  -1   13.94   13.65
  10   3  -1   19.32   16.00
  10   3   1   20.78   12.76
 -10  -3  -1   21.99   13.56
 -10   3  -1   14.52   13.44
  10   3   1   37.07   16.84
  10  -3   1    8.58   16.37
  10   5   0   84.74   24.54
 -10  -5   0  122.27   27.73
  10  -5   0   58.61   19.91
 -10   5   0   51.17   18.94
   5 -17   1   27.16   18.37
   5  17  -1   21.77   11.35
   5 -17  -1   43.02   21.14
   5  17   1   14.30    7.46
  -5  17  -1   31.11   17.50
  -5 -17  -1   10.73   10.63
  -5  17   1   26.96   20.35
  -5 -17   1   40.79   16.61
   0  -1   5  101.14   29.53
   0  -1  -5   66.22   21.04
   0   1   5  106.16   32.86
   0   1  -5  109.50   27.78
   0  12  -4   42.96   14.58
   0  12  -4    1.04    9.31
   0 -12  -4   22.31   11.28
   0  12   4   42.93   22.37
  -6  11   3   35.74   16.61
   6 -11  -3   61.63   19.86
   6  11   3   42.11   15.95
  -6  11  -3   68.85   22.90
  -6 -11   3   28.35   13.06
  -6 -11  -3   36.26   15.05
   6  11  -3   34.64   14.15
   6 -11   3   74.42   31.88
  -8 -12   1    7.79    7.85
   8  12   1    7.77    5.87
   8  12  -1    5.09    8.15
  -8 -12  -1    2.65    7.02
  -8  12   1   23.69   18.12
   8 -12   1    3.13    9.97
   8 -12  -1   -4.59   13.14
  -8  12  -1    1.24   14.34
  -4 -14   3   83.42   22.21
   4 -14   3  124.46   29.69
   4  14   3  111.63   26.09
  -4  14   3  162.94   38.06
  -4  14  -3  103.47   25.37
   4 -14  -3  146.33   29.17
  -4 -14  -3  114.50   24.31
   4  14  -3  109.94   27.60
   9   9   1   13.22    8.28
   9   9  -1    7.96    8.31
   9  -9   1   -2.48    9.46
  -9  -9   1   -8.78   13.32
   9  -9  -1   -7.58   11.80
  -9   9  -1    2.54   16.14
  -9   9   1    3.83   10.58
  -9  -9  -1   15.49    8.78
   0  16  -3  -10.35    9.94
   0  16   3   37.26   21.64
   0 -16   3   -8.86   13.46
   0 -16  -3  -11.63   10.03
  -4  18  -1   67.86   21.44
   4 -18  -1   93.23   25.55
  -4 -18  -1   66.17   22.73
   4  18   1   64.75   20.41
  -4 -18   1   56.05   19.19
  -4  18   1   78.06   23.16
   4  18  -1   58.46   18.65
   0 -20   0  199.32   28.83
   0  20   0  290.93   44.84
  -1   0  -5   -9.14    7.94
  -1   0   5    3.16   14.18
   1   0   5   17.91   18.14
   1   0  -5   22.35   16.15
   0  -2   5   41.85   23.38
   0   2   5   32.61   26.81
   0   2  -5   -1.50   11.95
   0  -2  -5   28.76   16.40
  -3 -15  -3  161.99   30.41
  -3  15  -3  136.60   26.57
   3  15  -3  118.76   27.44
   3 -15   3   72.78   19.37
  -3 -15   3  155.99   34.06
   3 -15  -3  133.20   26.43
  -3  15  -3  141.23   32.22
   3  15   3  142.73   30.26
  -3  15   3  199.77   38.87
   9   6  -2   55.46   19.71
  -9   6   2   78.64   24.16
  -9  -6   2  106.74   24.96
   9  -6  -2   61.94   19.06
  -9   6  -2   93.96   24.58
   9   6   2   55.84   15.65
  -9  -6  -2   65.23   18.65
   1  -1   5   53.49   23.83
  -1  -1   5   97.91   31.31
   1  -1  -5   63.41   18.80
   1   1  -5   57.90   22.69
  -1  -1  -5   55.99   18.74
  -1   1  -5   29.91   15.53
  -1   1   5   56.67   29.79
   1   1   5   30.60   21.90
   1 -12  -4   50.88   18.69
  -1 -12  -4   28.94   12.22
   1  12   4   28.88   19.61
  -1  12  -4   32.87   18.71
  -1  12   4   40.27   18.70
   1  12  -4   25.76   12.54
  -9  10   0  -19.91   19.15
   9  10   0   -4.41    7.03
  -9 -10   0   10.13   10.91
   9 -10   0    4.96   13.18
  -8 -10  -2  204.57   31.02
   8  10  -2  186.46   33.50
   8  10   2  108.89   19.47
  -8 -10   2  159.49   27.87
   8 -10  -2  262.92   41.50
  -8  10  -2  175.68   28.25
  -8  10  -2  202.29   43.16
  -2 -18  -2   -5.03   10.55
   2  18  -2   39.73   17.93
  -2 -18   2    6.18    9.01
  -2  18   2   33.63   17.37
   2  18   2   14.85   10.05
  -2  18  -2    7.14   11.61
   2 -18  -2   22.39   14.28
   2 -18   2   17.12   14.77
  -1 -16  -3   66.14   16.02
  -1  16   3  100.01   25.53
   1  16  -3   46.29   14.54
   1 -16  -3   62.04   17.94
   1 -16   3  101.47   29.55
  -1 -16  -3   87.88   20.62
  -1 -16   3  115.86   32.34
   1  16   3   79.02   22.80
  -1  16  -3   60.53   19.20
   1 -20   0   36.56   13.48
   1  20   0   26.51   17.19
  -1 -20   0   17.05   13.56
  -1  20   0   53.69   22.37
  -6  -4   4  115.14   25.80
   6  -4  -4  157.99   30.31
  -6   4  -4  166.12   33.11
  -6  -4  -4  135.60   27.17
  -6   4   4  133.98   31.83
   6   4   4  108.21   26.16
  -6  -4   4  194.48   37.45
   6   4  -4  170.42   36.32
   6  -4   4  153.56   34.06
  10   4   1   57.62   18.87
 -10  -4   1   18.06   13.47
 -10  -4   1   14.13    9.03
 -10   4   1   23.83    9.66
  10   4  -1   10.72   11.25
  10   4   1   39.16   13.96
  10  -4  -1   30.17   15.45
 -10   4  -1   17.84   14.35
  10  -4   1   42.05   19.25
  -1   2  -5   99.07   25.19
  -1   2   5  138.56   37.75
   1  -2  -5   57.44   15.17
   1   2  -5  105.70   28.49
  -1  -2   5  117.35   33.75
   1   2   5  114.47   29.48
   1  -2   5   53.02   19.46
  -1  -2  -5   92.14   24.09
   5 -13   3    0.86   14.75
   5 -13  -3    2.82   10.16
  -5 -13   3   26.42   17.39
  -5  13   3   14.91   15.03
   5  13   3   -1.81    8.39
  -5 -13  -3   16.31   12.45
   5  13  -3    4.83   10.77
  -5  13  -3    7.65   11.78
  -6  16   1    6.97   10.89
  -6 -16   1   21.35   12.63
  -6 -16  -1   17.42   12.31
  -6  16  -1    9.18   12.70
   6  16   1   15.58   11.14
   6  16  -1    5.58    7.63
   6 -16  -1    6.39   13.52
   6 -16   1   20.88   15.64
   0  -3   5  178.99   33.45
   0  -3  -5  143.44   25.05
   0   3   5  217.59   46.44
   0   3  -5  166.61   31.50
   8  -5  -3   46.44   20.40
  -8  -5  -3   31.69   14.49
  -8   5  -3   56.52   18.77
  -8  -5   3   11.86    9.52
  -8   5   3   24.72   10.43
   8  -5   3   36.33   17.75
   8   5   3   24.99   13.04
   8   5  -3   50.18   22.37
   7   9   3   64.12   17.67
  -7  -9   3   78.41   21.38
   7   9  -3   83.82   25.42
   7  -9   3  115.71   34.32
   7  -9  -3  105.44   24.75
  -7   9  -3  129.97   28.04
  -7  -9  -3   65.98   16.17
  -7   9   3  152.70   33.12
   8 -13   0  177.14   37.40
   8  13   0  155.94   25.76
  -8  13   0  171.55   40.06
  -8 -13   0  209.25   34.42
  -7 -15   0    2.25    7.46
  -7  15   0   22.42   15.54
   7 -15   0  -19.56   17.79
   7  15   0  -15.38    9.38
   3  11  -4  -13.41   13.25
   3 -11  -4   19.54   12.04
   3 -11   4    0.37   10.48
   3  11   4   -0.63   10.53
  -3 -11  -4   16.75   11.92
  -3  11  -4    6.69   12.84
  -3 -11   4   37.03   24.63
  -3  11   4   19.89   15.25
  10   6   0   33.66   19.12
 -10   6   0    8.60   16.41
 -10  -6   0   46.80   17.37
  10  -6   0   25.84   17.13
   1   3   5    2.63   14.04
  -1   3  -5   32.70   16.72
  -1  -3  -5   33.46   17.91
   1   3  -5   22.88   17.64
   1  -3  -5   13.96   12.02
  -1   3   5    1.95   14.58
  -1  -3   5   39.97   23.63
   1  -3   5    9.52   10.55
   3  19   1   51.31   19.10
  -3 -19   1   60.49   18.98
  -3 -19  -1   94.25   24.04
   3 -19  -1   70.23   22.13
  -3  19  -1  122.23   31.73
   3 -19   1   55.76   15.59
   3  19  -1   64.65   19.05
   5   8  -4   31.66   15.41
  -5  -8  -4   19.44   12.63
   5  -8  -4   24.52   13.29
  -5   8  -4   54.63   20.76
  -5   8   4   51.76   20.69
   5  -8   4   25.67   13.82
  -5  -8   4   28.28   14.07
   5   8   4   26.02   15.01
  -2   0  -5  173.24   30.48
   2   0   5  175.10   36.52
  -2   0   5  271.73   49.92
   2   0  -5  184.71   33.47
  -4 -17   2   17.20   11.26
  -4  17   2   26.28   16.07
   4  17   2   44.04   18.52
   4 -17   2   15.13    9.70
   4 -17  -2   20.95   12.99
  -4  17  -2   18.79    9.90
  -4 -17  -2   -1.19   11.02
   4  17  -2   26.60   14.76
   5  16   2   21.70    7.98
   5 -16   2   26.08   16.50
  -5 -16   2   16.32   10.55
   5 -16  -2   32.98   15.77
  -5 -16  -2   40.48   15.31
   5  16  -2   34.60   15.33
  -2   1   5   88.10   29.26
  -2   1  -5   70.17   21.72
   2  -1   5  112.27   30.54
   2   1  -5   73.63   23.74
  -2  -1  -5  103.63   23.10
   2  -1  -5   88.20   23.14
  -2  -1   5  152.91   39.81
   2   1   5  100.67   27.81
  -2 -12  -4    2.80    9.08
   2  12  -4   -3.40   11.25
  -2  12   4  -13.20   17.33
   2 -12  -4   -3.96   11.15
   2 -12   4    5.36    7.44
   2  12   4  -16.57   18.53
  -2  12  -4    0.08   11.97
   0  -4   5   26.55   18.16
   0   4   5   24.48   29.47
   0  -4  -5   30.18   16.91
   0   4  -5   29.67   19.99
   6  -5  -4   20.86   14.75
  -6   5   4    6.51   15.67
   6   5  -4  -14.67   12.50
  -6  -5   4   44.48   22.20
  -6  -5  -4    0.02    8.40
   6   5   4   18.22   14.10
  -6   5  -4    5.01   12.00
   6  -5   4   -0.25   12.17
  10  -5  -1   25.52   18.00
  10   5   1   18.58   13.53
 -10  -5   1    6.69   10.89
  10   5  -1   30.68   18.95
  10   5   1   23.04   15.85
  10  -5   1   14.29   18.08
 -10   5  -1   -1.79   13.81
 -10  -5  -1   21.94   13.95
 -10   5   1    6.21   12.68
   4  10  -4   49.85   20.74
  -4 -10   4   66.19   28.88
   4  10   4   54.93   17.66
  -4 -10  -4   83.92   24.38
  -4  10   4  106.50   32.46
   4 -10   4   63.13   19.66
   4 -10  -4   76.00   20.95
  -4  10  -4   93.97   25.80
   2  16   3   93.60   26.38
  -2  16   3   84.70   25.40
  -2 -16  -3   70.42   20.50
   2  16  -3   47.16   17.52
   2 -16  -3   65.81   18.51
  -2  16  -3   75.18   22.98
  -2 -16   3   83.66   24.89
  -9  -7  -2    3.78    7.41
   9   7   2    4.83    9.72
  -9   7   2   11.09   10.35
  -9  -7   2   37.14   16.73
   9   7  -2   35.64   18.10
   9  -7  -2   13.75   11.64
  -9   7  -2   13.75    8.10
  -2 -20   0    1.86    8.24
  -2  20   0  -17.51   16.05
   2  20   0   -5.49   13.60
  -7  13  -2   15.59   20.38
  -7  13   2   37.67   24.70
   7 -13  -2   40.48   18.90
  -7 -13  -2   32.94   12.86
  -7 -13   2   36.86   17.09
   7  13  -2   17.50   13.77
   0 -20   1   -1.04   10.20
   0  20  -1    3.09   12.12
   0 -20  -1   30.47   16.49
   0  20   1    1.43   10.07
  -2   2  -5   12.79   15.01
  -2  -2  -5   25.01   15.72
   2  -2   5   -7.37   13.54
   2   2  -5    9.21   12.88
   2  -2  -5   10.01   11.44
   2   2   5   -1.77   11.71
  -2  -2   5   32.77   20.21
  -2   2   5   33.00   22.92
   1  -4   5   37.40   17.32
   1   4   5   22.50   11.35
  -1   4   5   55.61   25.83
  -1   4  -5   49.31   21.10
   1  -4  -5   39.13   14.14
  -1  -4  -5   49.44   17.54
   1   4  -5   56.61   20.33
  -1  -4   5   43.04   19.13
  -5 -18   0   -3.63    7.91
   5 -18   0   -8.13   17.59
  -5  18   0    3.16    9.31
   5  18   0    5.87    8.20
   8  -6   3   28.80   19.18
   8   6   3   13.77   10.16
   8  -6  -3   22.96   11.20
  -8  -6  -3   27.41   14.51
  -8   6   3   42.41   21.81
  -8  -6   3   19.99   15.02
  -8   6  -3   12.17    9.42
   8   6  -3   22.28   11.89
  -9 -10   1   14.38   10.65
  -9  10   1   10.55   10.91
   9 -10  -1    7.56   11.19
  -9  10  -1   48.77   24.90
   9 -10   1   30.94   15.93
   9  10  -1   38.92   15.91
  -9 -10  -1   31.26   16.17
   9  10   1   12.02    7.72
   1 -20   1   85.53   22.26
  -1 -20  -1   74.84   22.87
   1  20  -1   60.78   19.97
  -1  20   1   66.23   21.81
  -1 -20   1   56.20   19.30
   1  20   1   85.46   27.27
  -1  20  -1   92.89   27.31
   4  19   0   38.58   16.58
   4 -19   0   49.58   22.03
  -4  19   0   61.11   20.26
  -4 -19   0   42.00   15.96
   3 -18  -2   21.07   14.39
   3  18   2   16.96    8.76
  -3  18   2   14.68   15.49
   3  18  -2   14.95   12.29
  -3  18  -2   10.09   12.81
  -3 -18   2    4.74    9.24
  -3 -18  -2   16.65   11.13
   3 -18   2   31.41   20.14
   2  -3  -5    8.84    8.10
   2  -3   5   23.11   15.19
  -2  -3   5   52.73   23.12
   2   3   5   10.92   10.13
  -2   3   5   70.04   34.29
   2   3  -5   18.86   15.92
  -2  -3  -5   51.47   19.32
  -2   3  -5   30.73   15.74
   6 -12  -3   -8.58   11.15
  -6  12  -3   -4.26   10.00
  -6 -12  -3   -9.02   10.47
   6  12   3   -2.81   10.89
  -6 -12   3   -6.93    9.76
  -6  12   3   -6.52   17.60
   6 -12   3   -5.77   15.52
   6  12  -3   -2.69    9.53
 -10  -7   0  135.29   27.27
  10  -7   0   69.92   21.93
  10   7   0  130.27   27.29
 -10   7   0   73.79   22.15
   0   5  -5  340.92   47.15
   0  -5  -5  299.05   36.63
   0   5   5  387.22   59.04
   0  -5   5  297.82   41.11
  -6  15   2   -4.11   13.08
  -6 -15  -2   -1.81    6.91
   6 -15  -2  -15.77   15.51
  -6  15  -2    5.56   14.53
   6  15  -2    5.18   11.74
   6 -15   2   -5.03   12.57
  -6 -15   2  -15.38   12.84
   6  15   2   -0.73    8.39
  -9  11   0   91.79   27.67
   9  11   0  132.55   24.63
   9 -11   0   91.37   26.13
   0  13   4    6.06   15.18
  -8  11  -2   55.18   22.90
   8 -11  -2   53.60   20.86
  -8 -11   2   17.69    8.76
   8  11  -2   47.50   19.08
  -8 -11  -2   61.95   16.53
  -8  11   2   97.23   33.82
  -6 -17   0    8.05   10.51
   6 -17   0    2.66   10.13
   6  17   0    6.07   10.53
  -6  17   0   35.51   18.02
  -8  13   1    8.17   17.59
   8 -13  -1   40.12   22.06
  -8  13  -1   14.61   17.78
  -8 -13   1   23.52   10.75
  -8 -13  -1   13.89   10.14
   8 -13   1   24.41   18.44
   8  13   1   21.48   11.11
   8  13  -1   11.44    9.98
   7 -15  -1  280.36   44.37
  -7  15  -1  225.99   42.35
   7  15  -1  197.33   32.02
   7  15   1  174.08   25.37
  -7  15   1  251.66   46.74
  -7 -15   1  190.23   32.11
   7 -15   1  254.97   45.80
  -7 -15  -1  343.62   44.22
  -6  -6  -4   60.99   18.08
  -6   6   4   92.37   29.41
   6   6   4   33.13   14.77
  -6  -6   4   59.42   22.25
   6  -6  -4   76.93   21.20
   6  -6   4   95.90   28.98
  -6   6  -4   60.28   20.51
   6   6  -4   85.68   26.44
   0  19  -2   13.61   13.05
   0 -19   2   16.41   18.78
 -10  -6   1  236.92   38.46
 -10   6  -1  233.76   45.01
  10  -6  -1  223.71   37.91
  10   6   1  320.88   38.55
 -10   6   1  257.66   41.91
  10   6   1  268.98   30.94
 -10  -6  -1  328.73   41.97
  10  -6   1  206.51   33.31
  10   6  -1  308.23   47.72
   7 -10   3   20.00   23.31
  -7 -10  -3    1.75    9.02
  -7  10  -3   19.27   11.76
   7 -10  -3    2.04   11.44
  -7  10   3   28.59   19.65
   7  10   3   10.75    9.65
  -7 -10   3   33.01   17.14
   7  10  -3   -2.35   12.67
   1   5   5   29.98   15.67
  -1  -5   5   34.67   17.15
  -1  -5  -5   -4.26   10.51
   1   5  -5   27.53   17.49
   1  -5  -5   32.70   15.30
  -1   5   5   40.77   25.39
   1  -5   5    2.49   12.69
  -1   5  -5   15.09   13.94
  -1 -13   4   39.11   21.31
   1  13   4   52.54   23.14
  -1  13   4   30.88   19.22
   1  13  -4   22.21   12.62
  -1  13  -4   32.27   17.85
  -1 -13  -4   27.43   13.15
   1 -13  -4   39.37   18.36
   4  15  -3  -10.73    9.26
   4 -15   3   20.69   17.49
  -4  15  -3   22.47   16.03
   4 -15  -3   11.57   12.46
  -4 -15  -3    0.85    7.87
  -4 -15   3  -13.10   16.41
  -4  15   3   -5.21   16.02
   4  15   3  -24.10   18.57
  -2  -4  -5   45.61   16.77
  -2   4  -5   42.16   19.22
   2  -4   5   23.83   12.42
  -2  -4   5   69.49   23.77
  -2   4   5   83.95   32.33
   2   4   5   18.54   10.30
   2   4  -5   57.50   22.44
   2  -4  -5   47.67   15.28
   1 -19  -2   33.50   15.51
   1  19  -2   28.23   16.32
  -1 -19   2   44.78   19.90
  -1 -19  -2    5.17    7.07
  -1  19   2   47.61   19.70
   1 -19   2   55.74   25.37
   1  19   2   23.82   13.05
   5  -9  -4   37.95   15.91
  -5  -9  -4   39.15   13.26
   5   9  -4   53.67   18.71
  -5   9  -4   37.99   18.07
  -5  -9   4   60.75   24.13
  -5   9   4   56.42   21.60
   5   9   4   30.43   14.51
   5  -9   4   32.14   14.83
  -9  -8   2  136.30   27.34
  -9  -8  -2  113.27   22.97
  -9   8   2  184.72   39.23
   9  -8  -2  189.31   35.83
   9   8  -2  158.23   33.44
   9   8   2   79.21   17.50
  -8   7   3    4.40   10.92
   8   7   3    5.66    7.52
  -8  -7  -3   -5.28   10.73
  -8   7  -3    6.94   13.15
   8   7  -3   11.73   10.99
  -8  -7   3   18.46   13.84
   8  -7  -3   -1.18    8.23
  -3   0   5   17.21   20.78
  -3   0  -5   -0.25    7.60
   3   0  -5   35.20   18.75
   3   0   5    3.06   13.63
  -2  20  -1  234.56   45.02
  -2 -20  -1  181.54   33.04
   2  20   1  121.17   28.98
  -2 -20   1  131.30   27.41
   2  20  -1  151.33   30.97
   2 -20   1  156.87   27.20
  -3  -1   5   10.24   13.80
   3   1  -5   31.54   18.10
   3  -1  -5   19.20   11.74
  -3   1   5   36.37   22.14
   3   1   5   57.18   22.52
   3  -1   5    7.58    8.75
  -3  -1  -5   28.20   13.63
  -3   1  -5   19.99   11.61
   3 -12  -4   98.79   23.19
   3  12  -4   79.14   22.72
   3  12   4  125.56   31.55
   3 -12   4   91.94   21.49
  -3  12   4  107.02   29.45
  -3 -12   4   82.82   26.69
  -3  12  -4   70.45   21.78
  -3 -12  -4   99.98   24.92
   0  17   3   76.66   23.78
   0  17  -3   33.97   12.47
   0 -17  -3   43.30   15.44
   0 -17   3   99.19   31.80
  -5  14   3   66.41   26.29
  -5 -14  -3   36.07   14.90
  -5 -14   3   32.47   16.22
   5 -14  -3   24.77   11.94
   5 -14   3   83.44   33.92
   5  14   3   21.87   15.81
  -5  14  -3   19.78   12.69
   5  14  -3   39.66   19.82
  -3 -16   3   26.45   17.35
   3  16   3  -13.34   15.59
   3  16  -3   30.15   17.44
  -3  16   3   52.18   23.79
   3 -16  -3   17.83   14.14
  -3  16  -3   16.71   10.98
  -3 -16  -3    4.85    7.58
  -5  18  -1  128.99   29.13
  -5  18   1  153.92   34.68
   5  18   1  117.82   25.54
   5 -18  -1  143.70   31.42
   5 -18   1  179.66   42.27
  -5 -18  -1  121.09   27.60
   5  18  -1   88.81   21.00
  -5 -18   1   97.55   25.43
   0   6  -5    1.72   11.72
   0  -6   5  -18.70   13.22
   0   6   5   -3.74   13.98
   0  -6  -5    4.81    9.74
   3  20   0   24.15   15.37
  -3 -20   0   -0.54    9.64
  -8  14   0  112.30   35.43
   8  14   0   94.58   19.68
   8 -14   0  143.74   32.96
  -8 -14   0  137.29   28.57
   3   2  -5    4.74   12.99
   3   2   5   35.45   18.38
   3  -2  -5   -2.22   12.57
  -3  -2   5   65.07   24.73
   3  -2   5  -11.68   15.00
  -3   2   5   38.27   22.95
  -3  -2  -5   10.15    7.98
  -3   2  -5   23.47   15.11
  -4 -11  -4  -18.86   17.54
  -4  11   4    9.38   14.82
   4 -11  -4   -7.16   13.05
  -4  11  -4  -26.69   18.00
   4  11  -4  -28.80   18.54
  -4 -11   4   -1.98   14.94
   4 -11   4   28.96   16.13
   4  11   4   19.78   16.08
   1 -17  -3   -8.14   10.51
  -1  17  -3   -1.91    9.33
  -1 -17  -3    2.37    8.03
   1  17  -3    3.21    9.93
  -1 -17  -3   -7.39   11.68
  -1  17   3    6.81   10.58
  -1 -17   3   -1.36   12.81
   1  17   3   22.83   19.93
   1 -17   3    5.46   12.91
  10   0  -2  281.05   48.21
 -10   0  -2  354.95   51.23
 -10   0   2  247.90   39.35
  10   0   2  244.74   39.25
  -4 -19   1    8.27    8.73
   4  19  -1   -3.48    7.79
   4 -19  -1  -14.64   12.72
  -4 -19  -1  -14.49   15.56
  -4  19   1   23.79   17.36
   4  19   1  -15.70   14.67
  -1  -6   5  102.76   26.68
   1  -6   5   69.81   21.27
  -1  -6  -5   61.32   19.01
  -1   6  -5   84.06   25.43
  -1   6   5  106.95   32.03
   1   6   5   84.79   29.95
   1   6  -5   77.51   23.42
   1  -6  -5   63.10   17.81
 -10   8   0   82.85   25.62
  10  -8   0   69.85   22.32
  10   8   0  110.43   24.36
 -10  -8   0  130.99   26.98
  -7   0   4   19.36   18.73
   7   0  -4   12.56   18.28
   7   0   4   37.35   20.90
  -7   0  -4   14.26   18.33
  -2   5   5   33.18   20.56
  -2  -5   5   40.85   20.52
  -2  -5  -5   17.77   11.40
   2  -5   5    5.25    8.63
  -2   5  -5   34.49   15.86
   2   5  -5   16.20   18.97
   2   5   5    8.15   11.61
   6   7   4   34.86   15.18
   6  -7  -4   42.06   14.04
   6   7  -4   76.53   26.25
  -6  -7  -4   85.67   22.83
  -6   7  -4   53.04   18.66
   6  -7   4   55.01   21.40
  -6   7   4   74.65   28.04
  -6  -7   4   81.27   26.25
 -10   1   2  186.50   34.64
  10  -1  -2  252.69   44.83
 -10   1  -2  252.34   43.22
 -10  -1   2  264.68   43.65
  10   1  -2  216.14   42.71
 -10  -1  -2  256.51   41.54
  10   1   2  181.49   32.05
  10  -1   2  214.15   37.95
  10  -7  -1   84.18   25.48
 -10   7  -1   85.21   28.25
  10  -7   1   30.34   10.43
  10   7  -1  111.09   30.32
 -10  -7   1   76.14   23.58
 -10  -7  -1  117.25   27.08
 -10   7   1   61.70   22.33
   7   1   4   88.85   30.56
  -7   1   4  140.70   36.95
   7   1  -4   85.72   25.37
   7  -1  -4   95.01   30.16
  -7   1  -4  108.57   28.10
  -7  -1  -4  105.05   27.77
  -7  -1   4  106.81   26.74
   7  -1   4  117.95   30.57
   2  13   4   61.20   25.00
  -2 -13   4   50.32   19.39
   2  13  -4   68.40   20.88
  -2  13   4   58.57   25.36
  -2  13  -4   64.54   24.41
  -2 -13  -4   47.41   18.47
   2 -13  -4   75.93   21.72
  -7  16   0   27.94   17.13
   7  16   0   -8.63   10.96
   7 -16   0  -17.04   17.54
  -7 -16   0   23.93   14.97
  -9 -11  -1  155.46   28.52
   9  11  -1  124.07   26.56
  -9 -11   1   73.85   22.08
   9  11   1   99.45   19.92
  -9  11   1   93.20   27.61
   9 -11   1  111.15   27.47
  -9  11  -1  110.12   34.26
   9 -11  -1   89.63   26.66
   6  17   1   59.88   17.32
   6 -17   1   69.84   25.11
  -6  17  -1   96.42   27.17
   6 -17  -1   82.31   25.32
   6  17  -1   68.53   19.23
  -6 -17  -1   98.77   25.16
  -6  17   1  105.73   30.65
  -6 -17   1   71.78   20.32
  -2  19  -2   44.36   20.67
   2 -19  -2   24.53   11.49
  -2  19   2   87.02   30.71
   2  19   2   44.63   18.49
  -2 -19  -2   31.22   13.38
   2  19  -2   40.76   17.14
  -2 -19   2   71.84   24.43
   2 -19   2   57.80   25.01
  -3   3   5   56.48   29.21
   3   3  -5   63.94   22.20
  -3  -3   5   56.64   22.73
  -3  -3  -5   26.92   12.98
   3  -3   5    8.08    9.67
   3   3   5   30.87   17.95
  -3   3  -5   56.96   20.19
  10  -2   2   13.99   16.99
 -10   2  -2   46.96   24.05
  10  -2  -2   83.32   31.47
  10   2   2   25.92   17.30
  10   2  -2   72.29   31.83
 -10  -2  -2   35.14   22.88
 -10   2   2   32.19   19.18
 -10  -2   2   65.72   24.75
  -7   2   4  229.11   42.25
  -7  -2   4  182.09   34.86
   7  -2  -4  164.96   34.18
   7  -2   4  169.91   37.49
   7   2   4  149.61   32.45
   7   2  -4  152.12   35.44
  -7   2  -4  165.22   33.20
  -7  -2  -4  210.30   36.39
   0  21   0   -2.81   12.05
   0 -21   0   -3.09    7.27
  -7  14  -2   27.65   21.77
  -7 -14  -2   18.91   12.52
   7  14  -2   34.03   18.19
  -7  14   2   57.32   29.52
  -7 -14   2   16.25   11.73
   7 -14  -2   32.74   17.49
  -1  21   0   25.99   21.36
  -1 -21   0   44.82   17.07
   1  21   0   28.38   14.28
   1 -21   0   19.25   11.27
  -9   0  -3   31.50   19.47
   9   0   3   27.12   17.13
  -9   0   3   21.24   17.39
   9   0  -3   14.67   21.05
  10   3  -2  260.01   44.05
  10  -3  -2  235.50   43.33
  10  -3   2  194.51   37.76
 -10   3   2  155.22   30.24
  10   3   2  206.00   35.00
 -10  -3  -2  231.76   39.20
 -10   3  -2  245.74   41.58
  -8  -8  -3   42.54   15.55
   8  -8   3   80.77   31.99
  -8   8   3   57.09   23.67
   8  -8  -3   71.17   22.39
   8   8  -3   63.03   23.09
  -8   8  -3   48.04   18.19
  -8  -8   3   53.53   19.15
   8   8   3   24.72   11.61
   5 -17   2   25.55   15.74
  -5 -17   2   22.35   14.88
   5 -17  -2   42.85   18.01
  -5 -17  -2   25.42   15.72
   5  17   2   24.57   15.89
   5  17  -2   11.42   11.71
  -5  17   2   24.02   15.52
   5 -17   2   30.14   22.74
   7   3   4   34.16   17.41
  -7   3  -4  111.49   28.05
   7  -3  -4   71.07   25.10
   7   3  -4   75.20   27.03
  -7  -3  -4   69.10   21.49
   7  -3   4  104.80   31.98
  -7   3   4   55.13   22.47
   9  -1  -3   96.74   29.61
   9   1   3   79.16   23.84
  -9  -1  -3  114.93   29.17
  -9   1  -3  117.86   29.98
   9   1  -3   95.81   29.38
  -9  -1   3   63.15   21.63
   9  -1   3   71.17   22.31
   9  12   0  138.02   26.02
   9 -12   0   84.74   25.25
  -9 -12   0  149.59   30.76
  -9  12   0  146.59   40.41
   0   7   5  217.54   46.68
   0   7  -5  167.72   33.36
   0  -7   5  166.53   30.25
   0  -7  -5  133.93   24.78
  -8 -12   2   -8.80   10.43
  -8  12   2   -1.16   15.04
   8 -12  -2   21.76   15.72
  -8  12  -2    1.21   12.28
  -8 -12  -2    3.33    9.00
   8  12  -2    7.13   10.22
   6  13   3    9.84    9.59
  -6  13  -3    4.29   10.33
   6  13  -3    6.88   12.76
   6 -13  -3   30.85   16.92
  -6 -13   3   16.27    9.57
  -6  13   3   50.65   25.01
   6 -13   3    1.57   20.78
  -6 -13  -3   24.52   13.75
  -9  -9   2   29.21   14.06
  -9  -9  -2   27.53   12.55
   9   9  -2    0.99    9.61
  -9   9   2   36.40   19.06
   9  -9  -2   35.63   17.05
   7  11  -3   72.01   23.71
   7 -11   3   99.15   36.81
  -7  11   3  115.99   32.19
  -7  11  -3   56.51   19.18
  -7 -11  -3   51.34   15.69
   7  11   3   64.61   17.53
  -7 -11   3   57.46   20.57
   7 -11  -3   77.40   22.35
   3   4   5    3.04   10.71
  -3  -4   5  -19.17   13.36
  -3   4  -5   10.91   13.28
   3  -4   5   20.86   16.89
  -3  -4  -5   27.23   14.40
  -3   4   5   38.02   27.82
   3   4  -5   30.29   17.07
  -2 -17  -3   33.26   18.10
   2  17  -3    2.17    9.31
   2 -17  -3   17.04   12.18
  -2  17  -3   19.57   14.40
   2  17   3   25.59   15.45
  -2  17   3   -6.09   16.01
   2 -17   3    2.10   11.61
  -2 -17   3    1.52   12.71
   4  18   2   12.10   13.78
  -4  18   2   31.94   21.54
  -4 -18  -2   24.68   16.36
   4  18  -2   11.25   11.98
  -4 -18   2    2.92    9.91
   4 -18  -2    4.57    8.19
   4 -18   2   -7.00   11.08
  -5  10   4   16.30   15.78
  -5 -10  -4   25.41   15.70
  -5  10  -4  -14.33   15.05
  -5 -10   4   14.83   15.48
   5  10   4   -6.64   11.02
   5 -10   4  -16.71   15.79
   5  10  -4   -6.77   14.34
   5 -10  -4  -17.30   13.24
   2  -6   5   47.54   18.30
  -2   6   5   50.86   27.11
  -2  -6  -5   10.65    7.46
  -2   6  -5   30.07   16.38
   2   6  -5   29.70   13.47
   2   6   5   49.52   22.25
  -2  -6   5   47.99   19.02
  -9   2   3  196.86   40.02
   9   2   3  126.74   29.92
  -9  -2  -3  189.36   36.13
  -9   2  -3  165.64   34.93
   9   2  -3  150.39   36.01
   9  -2   3  155.22   33.37
  -9  -2   3  137.10   28.91
   9  -2  -3  172.56   39.52
   3 -20  -1    4.42   12.13
   3  20   1    8.30   14.17
   3  20  -1    8.11    8.25
  -3 -20  -1  -19.86   17.71
  -3  20  -1    1.38   11.39
  -3 -20   1   17.54   13.52
  -3  20   1   12.48   11.61
   1  -7   5   30.20   13.12
  -1  -7  -5   12.00   10.92
   1   7   5   29.05   19.25
  -1   7   5   46.67   27.70
  -1   7  -5    2.24   10.16
  -1  -7   5   17.72   13.33
   0  14   4  131.39   33.40
   8 -14   1   27.94   20.15
   8  14   1   13.49    8.09
  -8 -14   1   30.34   15.70
   8  14  -1   52.61   19.90
  -8 -14  -1   41.93   16.55
  -8  14   1   58.41   27.87
   8 -14  -1   40.23   21.55
  -8  14  -1   39.54   19.65
 -11   0   0   12.00   14.90
  11   0   0  -13.84   14.33
  11  -1   0    6.99   14.08
 -11   1   0   -5.68   17.51
 -11  -1   0   24.31   15.67
  11   1   0   11.99   16.54
  -6  -8  -4    3.93    9.74
   6  -8   4   23.38   15.47
  -6  -8   4   11.89   11.30
   6  -8  -4   19.28   13.80
  -6   8   4   61.30   31.66
  -6   8  -4   35.29   16.51
   6   8  -4   15.02   16.98
   6   8   4   24.65   15.04
  10  -4  -2  236.63   43.33
 -10   4   2  147.07   31.49
  10   4   2  123.21   26.04
  10   4  -2  222.17   42.23
  10  -4   2  142.27   34.99
 -10  -4  -2  176.11   34.82
 -10   4  -2  193.50   37.14
  10   8  -1   81.85   24.88
  10  -8  -1   36.27   18.38
 -10   8  -1   53.64   23.95
 -10  -8  -1   86.71   23.21
 -10  -8   1   42.66   19.37
 -10   8   1   63.60   25.24
   7   4  -4  -10.25   13.67
   7   4   4   15.74   12.67
  -7   4   4   27.44   21.12
   7  -4  -4    8.76   13.22
  -7  -4  -4   -5.25   10.99
  -7   4  -4    7.78   11.30
   7  -4   4    4.00   10.62
  -6 -16   2   26.52   14.89
   6  16   2  -20.18   14.54
   6 -16   2   -5.31   15.09
   6 -16  -2   12.36   12.45
  -6  16   2   32.50   25.46
  -6 -16  -2   31.63   16.72
  -6  16  -2   17.41   15.26
   6  16  -2   13.12   12.23
  -1  14   4   65.00   25.75
  -1 -14  -4   45.62   16.86
   1 -14  -4   47.84   19.40
  -1 -14   4   48.74   21.80
   1  14  -4   49.05   16.85
   1  14   4   75.82   27.52
  10   9   0   41.85   17.00
  10  -9   0   31.55   17.10
 -10   9   0   37.67   20.90
 -10  -9   0   42.66   14.78
   9   3  -3  166.12   36.59
   9  -3  -3  192.59   37.79
  -9   3   3  191.75   37.62
  -9   3  -3  245.66   43.46
   9  -3   3  180.41   35.67
   9   3   3  123.00   26.77
  -9  -3  -3  171.77   33.26
   5 -19   0  214.85   44.49
   5  19   0  117.14   25.11
  -5 -19   0  179.70   32.41
  -5  19   0  176.97   34.88
   7  16  -1  145.37   28.63
   7  16   1  105.32   20.71
  -7 -16   1  150.20   29.26
   7 -16   1  200.49   41.23
   7 -16  -1  213.70   40.31
  -7  16   1  210.41   44.66
  -7  16  -1  143.43   31.33
  11   2   0   34.59   21.84
 -11   2   0   44.72   19.37
 -11  -2   0   24.63   16.84
  11  -2   0   33.85   21.56
  -3   5  -5   33.32   16.85
  -3  -5  -5   45.90   20.51
   3  -5   5   50.29   20.06
  -3   5   5   89.85   35.52
  -3  -5   5   49.53   20.95
   3   5   5   21.99   13.24
  -2 -21   0   81.15   20.83
   2  21   0  102.05   27.17
  -2  21   0  144.39   34.88
  -3  13   4   -9.09   15.77
   3  13   4  -20.71   20.66
   3  13  -4  -11.88   16.32
   3 -13   4    8.35    9.71
  -3 -13  -4   17.74   15.00
  -3  13  -4  -15.05   15.87
  -3 -13   4  -19.13   18.70
   3 -13  -4    6.74    9.28
   0 -21   1   73.67   19.76
   0  21  -1  123.74   32.82
   0  21   1  105.15   29.07
   4   0   5   -1.72    9.65
   4   0  -5   26.04   16.72
  -4   0  -5    2.58   11.79
  -4   0   5   59.90   25.52
  -4  -1   5   44.13   24.27
  -4   1   5   36.77   20.36
   4   1   5   -3.71   11.37
  -4  -1  -5   23.87   15.63
  -4   1  -5   20.04   13.08
   4  -1   5   26.87   15.03
   4  -1  -5   27.48   16.85
   4   1  -5   31.90   19.61
  -4  12  -4  -15.60   13.58
   4 -12   4   -8.92   14.38
   4  12   4  -13.44   14.20
  -4 -12   4   11.62   13.68
  -4  12   4   17.33   21.39
  -4 -12  -4  -14.44   13.20
   4 -12  -4   -1.81    9.93
   4  12  -4   -8.45   14.17
  -3  19  -2   50.03   26.36
   3 -19  -2    6.99   12.45
   3  19  -2   20.93   14.89
  -3 -19  -2   13.17   11.97
   3 -19   2  -19.46   19.87
  -3 -19   2   25.88   12.91
   3  19   2   17.00   14.18
  -3  19   2   43.01   24.43
   6  18   0   28.69   13.00
   6 -18   0   73.97   26.48
  -6  18   0   90.68   28.29
  -6 -18   0   54.48   20.20
  -4  16   3   -9.91   16.10
   4 -16  -3   -2.53    7.93
  -4 -16   3    4.94   16.19
   4  16  -3    6.11    9.88
  -4 -16  -3    8.88   10.61
  -4 -20   0   54.40   18.31
   4 -20   0   72.85   26.04
   4  20   0   33.39   16.72
  11   3   0   88.40   27.17
  11  -3   0   81.90   24.95
 -11   3   0   94.70   27.19
   1  21  -1    4.42   10.21
   1  21   1    0.62   11.07
  -1 -21  -1  -10.59    8.92
   1 -21   1   16.79   11.24
  -1 -21   1  -13.14   10.89
  -1  21   1   13.44   13.06
   4  -2   5   13.86   14.56
   4  -2  -5   -0.82    9.51
  -4   2   5   14.97   17.37
  -4   2  -5   14.21   13.29
   4   2   5    0.58   11.81
  -4  -2   5   -4.92   13.80
   4   2  -5   24.34   17.18
  -4  -2  -5   29.87   16.99
  -9   4  -3   39.80   20.78
  -9  -4  -3   36.91   18.12
   9   4  -3   51.88   27.06
   9  -4   3   44.68   21.99
  -9   4   3   36.58   21.11
   9   4   3   26.67   14.95
   9  -4  -3   14.82   20.55
  -2   7  -5    2.44    9.96
   2   7  -5   -0.35   10.05
   2  -7   5    7.34    8.68
   2   7   5   25.61   18.08
  -2   7   5   11.67   24.82
  -2  -7  -5   16.72   11.68
   0  -8   5  -24.07   12.97
   0   8  -5  -16.85   12.72
   0  -8  -5   -8.57    8.90
   0   8   5  -15.71   18.44
   5 -15  -3   92.10   26.71
  -5 -15   3   51.21   19.11
   5  15  -3   80.62   27.85
  -5 -15  -3   69.35   20.64
  -5  15  -3   43.78   19.03
   5 -15   3  129.48   42.68
  -5  15   3  138.51   38.39
 -10   5   2  220.23   37.94
  10  -5  -2  192.56   38.00
  10   5  -2  170.56   35.76
 -10  -5  -2  174.31   31.33
  10  -5   2  195.10   38.39
  10   5   2  143.53   27.95
   7  -5  -4   40.21   16.80
  -7   5  -4   59.68   20.69
   7   5   4   35.60   18.14
  -7  -5  -4   20.18   12.81
   7  -5   4   20.35   17.03
   7   5  -4   47.26   22.87
  -7   5   4   57.84   26.32
   9  12  -1  232.81   37.49
   9  12   1  163.67   24.28
   9 -12   1  117.49   25.40
  -9 -12   1  151.10   30.77
  -9 -12  -1  292.51   40.45
   9 -12  -1  189.66   39.35
  -9  12  -1  199.89   43.73
  -8   9  -3   83.82   24.29
  -8  -9  -3   27.68   12.14
  -8   9   3   72.65   25.69
   8  -9   3   95.86   33.37
   8   9   3   55.48   18.98
  -8  -9   3   74.21   23.33
   8   9  -3   51.54   21.15
   8  -9  -3   33.08   16.50
   0  20  -2  126.35   31.28
   0 -20   2  125.30   33.08
   8 -15   0   35.78   19.48
  -8  15   0   47.91   28.28
   8  15   0   18.38   11.42
  -8 -15   0   27.99   15.05
  -1   8   5  110.79   35.70
   1   8   5   68.01   25.27
   1  -8   5   86.87   22.85
  -1  -8  -5   74.27   19.61
   1   8  -5   68.53   23.86
  -1   8  -5   67.89   22.99
  -2 -14  -4   30.13   16.31
   2  14  -4   11.05    9.69
  -2  14  -4   50.67   21.03
   2 -14  -4   -6.82    8.90
  -2  14   4   44.44   27.65
   2  14   4   23.05   14.14
  -2 -14   4   23.51   19.68
   3 -17  -3   54.60   18.38
  -3  17   3   80.80   27.03
   3  17  -3   59.57   20.07
  -3 -17   3   50.49   20.65
  -3 -17  -3   46.76   16.27
  -9  10   2   45.42   26.28
  -9 -10   2   29.52   15.00
  -9 -10  -2   13.68   12.21
   9  10  -2   -1.55   13.00
   9 -10  -2    9.59   10.68
  -4   3  -5   32.28   13.94
  -4  -3  -5   28.61   16.01
   4   3  -5   21.58   13.89
  -4  -3   5  -15.85   19.57
   4   3   5   29.70   16.05
   4  -3   5   16.73   14.28
  -3  -6  -5   34.64   19.95
   3   6   5    1.06    9.81
  -3   6   5   26.81   26.83
  -3   6  -5   10.18    8.52
   3  -6   5   19.91   14.65
   0 -18  -3  -13.03   12.39
   0  18   3    2.21   11.73
   0 -18   3   -1.11   13.85
   0  18  -3   -3.90    8.79
 -11   0   1   -6.30    9.76
  11   0  -1   43.53   26.05
  -1 -20   2   17.82   15.12
   1 -20   2   41.29   19.30
   1  20   2   45.15   18.22
  -1  20  -2    9.04   16.12
   1 -20  -2   -5.46    7.72
   1  20  -2   12.12   16.44
  11  -4   0   32.51   17.95
 -11  -4   0   15.89   13.89
 -11   4   0   28.71   16.15
  11   4   0   50.98   21.77
 -11   1   1  153.92   30.59
  11  -1  -1  147.31   36.47
 -11  -1   1  147.03   29.45
  11   1   1  224.02   42.71
 -11  -1  -1  187.66   34.59
  11   1  -1  203.67   41.56
  -5  11  -4   90.35   27.44
  -5 -11  -4   82.91   21.94
  -5  11   4  107.00   32.65
   5  11  -4   69.22   25.01
  -5 -11   4   71.36   24.87
   5 -11   4   95.06   26.89
   5  11   4   49.22   19.80
   5 -11  -4   77.71   21.77
  -6  -9   4   34.35   20.32
  -6   9   4   21.61   19.28
  -6   9  -4   36.87   17.41
   6  -9  -4    0.10    8.08
   6   9  -4   28.40   18.46
   6   9   4   -9.69   15.26
   6  -9   4   27.10   19.69
  -6  -9  -4    4.32    9.43
  -7 -12   3    3.43    9.83
  -7  12  -3   11.47   11.90
   7  12  -3   20.23   17.57
  -7  12   3   79.75   31.69
   7  12   3   20.91   10.44
  -7 -12  -3   47.49   17.92
   7 -12  -3   43.96   18.41
   7 -12   3   53.44   32.41
  10   9  -1   48.19   18.52
 -10   9   1   55.25   23.83
 -10  -9   1   44.99   18.00
  10  -9  -1   56.47   22.52
 -10   9  -1   54.70   27.58
 -10  -9  -1   74.22   22.49
   9  -5   3   62.23   24.83
   9  -5  -3   36.18   16.96
  -9   5  -3   50.37   22.40
   9   5  -3   25.42   18.11
  -9  -5  -3   35.36   17.89
   9   5   3   16.18   14.08
  -9   5   3   50.19   26.32
   5  19   1   18.55   15.70
   5 -19  -1   11.51   12.94
  -5 -19   1   34.21   15.98
   5  19  -1   13.68   11.08
  -5 -19  -1    3.51    8.86
   5 -19   1   13.54   17.17
  -5  19   1   40.60   23.14
   1 -18   3   64.37   27.05
   1 -18  -3   17.09   12.89
  -1  18   3   43.55   22.09
   1  18  -3   27.14   11.12
  -1 -18  -3   12.98    9.80
   1  18   3   29.36   16.83
  -1 -18   3   27.82   18.64
   9 -13   0   -5.58   15.81
  -9 -13   0   28.07   16.00
   9  13   0   17.54   12.12
  -9  13   0   15.15   16.81
 -11  -2  -1  131.23   29.49
  11   2  -1  152.55   36.91
 -11  -2   1  138.26   32.84
  11   2   1  151.88   35.77
 -11   2   1  138.53   30.65
  11  -2  -1  126.81   33.20
   8 -13  -2   90.17   27.47
   8  13  -2   63.11   21.05
  -8 -13   2   65.55   22.42
  -8  13  -2   72.58   26.57
  -8 -13  -2  118.60   25.33
  -8  13   2  115.40   38.36
   7  15  -2    8.54    8.17
   7 -15  -2   16.85   12.88
  -7 -15  -2   28.06   15.43
  -7  15   2   42.20   23.35
  -7 -15   2   19.81   14.28
  -7  15  -2   13.10   14.75
   7 -17   0   56.20   24.25
  -7  17   0   22.38   13.94
  -7 -17   0   59.78   20.59
   7  17   0   44.45   16.03
  -2 -21  -1   12.92   12.84
  -2  21  -1   22.78   21.04
   2  21  -1   26.63   14.97
   2 -21   1   27.13   14.88
  -2 -21   1   34.06   15.08
   2  21   1   -2.41   11.33
 -10   6   2   12.97   16.99
  10  -6  -2   34.97   19.54
 -10  -6  -2   26.99   17.04
  10   6   2  -16.94   13.39
  10  -6   2   12.93   18.46
  10   6  -2   -1.29   10.10
  -4   4  -5   -5.82    9.47
  -4   4   5   23.82   21.99
  -4  -4   5   14.95   10.81
   4   4   5    6.95   12.57
  -4  -4  -5  -16.17   13.41
   4  -4   5  -25.06   17.44
  10  10   0    0.18    7.96
  10 -10   0    7.25    9.89
 -10 -10   0  -16.02   12.82
 -10  10   0  -14.83   12.94
   7   6  -4   96.79   27.94
  -7   6  -4   75.23   23.57
  -7  -6  -4   80.16   21.46
   7  -6   4   79.41   24.94
   7  -6  -4   82.01   22.00
   7   6   4   60.48   19.80
   6 -14   3   97.83   39.51
  -6 -14   3   53.51   21.16
  -6  14   3   90.74   31.60
   6 -14  -3   49.00   17.91
   6  14  -3   86.34   27.72
  -6 -14  -3   50.46   16.02
  -6  14  -3   60.87   21.09
   6  18  -1   15.39   10.65
  -6 -18   1    0.90    7.74
  -6  18   1   20.67   15.48
   6  18   1    6.04    8.90
   6 -18   1   28.25   19.27
  -6  18  -1    9.97   15.10
  -6 -18  -1    7.98   11.44
   6 -18  -1   24.13   17.03
  -3 -21   0   -8.36   10.79
   3  21   0    6.90    8.31
   4 -20  -1   31.04   19.28
   4  20  -1   14.05   10.75
   4  20   1   14.18   12.48
  -4 -20   1   24.03   15.65
  -4 -20  -1   24.53   14.39
  -4  20   1   11.79   11.32
   2  -8   5    4.30   11.11
   2   8  -5   22.06   18.00
  -2   8  -5   -7.30   10.22
   2   8   5   -6.59   12.52
  -2   8   5   -4.50   15.03
  -2  -8  -5   -4.50   11.59
 -11   3   1  115.70   30.71
 -11  -3  -1   65.32   19.51
  11  -3  -1   67.21   23.89
 -11   3  -1   64.20   21.74
  11   3   1   75.16   24.89
  11   3  -1   65.40   22.75
  11   5   0  -10.93   11.58
 -11  -5   0   -6.03    9.66
  11  -5   0   10.03   11.61
 -11   5   0   -2.56   10.82
   0   9  -5  252.14   42.38
   0   9   5  277.17   53.16
  -2 -20   2   30.08   18.84
  -2  20   2   52.48   29.10
  -2 -20  -2    1.30   10.89
   2 -20   2   16.82   14.20
   2 -20  -2    9.66   10.66
   2  20  -2   11.80   11.58
   2  20   2   41.06   20.11
  -2  20  -2   20.44   17.45
   0  15   4   -9.03   20.02
   0 -15   4  -35.35   25.55
   8  15  -1   10.42    8.15
  -8 -15  -1   17.92   13.32
   8 -15  -1   -4.94   15.57
  -8 -15   1   -0.57    8.78
   8 -15   1    9.88   12.35
  -8  15   1    6.01   12.81
   8  15   1    4.50    7.48
  -8  15  -1   14.85   18.47
  -3   7  -5   43.16   18.72
  -3  -7  -5   38.08   18.30
   3   7   5   16.00   15.02
   3  -7   5   28.25   15.98
  -5  18   2    4.02   21.65
   5  18   2   -8.75    9.78
   5 -18   2   39.44   21.54
   5 -18  -2   -7.00   12.43
   5  18  -2   -2.46   10.37
  -5 -18  -2    7.39    9.32
  -5 -18   2   24.43   15.52
   9  -6   3   68.09   29.79
  -9   6   3   87.91   29.72
   9   6   3   45.19   20.06
   9  -6  -3   39.13   19.13
  -9   6  -3   66.60   24.28
   9   6  -3   62.57   24.64
  -9  -6  -3   56.89   20.59
   8 -10   3   32.01   18.60
   8  10  -3    8.30   10.16
  -8  10   3   71.72   29.08
  -8 -10   3   36.96   17.97
   8 -10  -3   29.12   15.36
  -8 -10  -3   31.59   12.07
   8  10   3   20.16   11.07
  -8  10  -3   45.38   16.69
  -4   5  -5   34.48   17.53
   4   5   5   11.07   10.64
  -4  -5   5   -3.78   15.41
   4  -5   5   -1.54    9.35
  -4   5   5   30.89   23.52
  -4  -5  -5   24.24   15.10
  -2  18   3   15.72   13.58
   2 -18   3    9.72   17.42
  -2 -18   3   31.93   22.39
  -2 -18  -3   39.59   18.46
   2  18  -3   16.53   10.36
  -2  18  -3   26.40   19.89
   2 -18  -3   20.40   13.70
   1   9   5   17.83   16.25
  -1   9  -5   -1.77   14.04
  -1  -9  -5    2.12    8.80
   1   9  -5   19.42   17.37
   1  -9   5   43.07   17.05
  -1   9   5   71.72   31.36
  -4  13  -4   12.64    9.94
  -4  13   4   31.72   22.90
  -4 -13   4   22.79   18.65
   4  13   4   55.08   22.35
  -4 -13  -4   56.37   21.63
   4  13  -4   14.16   14.56
   4 -13  -4   38.87   19.00
   4 -13   4   -4.43   12.13
  -1  15   4   95.92   32.28
   1  15   4  108.51   34.59
   1  15  -4   57.09   18.42
  -1 -15   4   87.02   29.15
  11  -4  -1   11.83   18.90
  11   4   1  -16.10   15.50
 -11  -4  -1   -1.08   10.87
  11   4  -1    7.62   15.89
 -11   4  -1   18.81   23.18
 -11   4   1   -0.40   13.40
  -3  14   4   16.74   20.90
   3 -14  -4   23.76   15.95
  -3 -14  -4   25.51   14.60
  -3  14  -4   12.68   11.91
   3  14  -4   28.14   16.13
  -3 -14   4   26.29   23.01
   3  14   4   22.64   16.56
   0  22   0  -19.93   15.48
   0 -22   0   15.04   11.65
  -4 -19  -2   41.77   17.71
   4 -19   2   51.40   23.77
   4 -19  -2   19.83   15.50
   4  19  -2   35.24   17.37
  -4 -19   2    5.18    9.35
   4  19   2   31.41   18.48
  -4  19   2   66.37   30.47
  -4  19  -2   14.38   16.43
 -10  -7  -2   50.61   18.80
 -10   7   2  120.76   34.47
  10  -7  -2  109.23   27.57
  10   7  -2   90.21   28.23
  10   7   2   56.06   19.20
  -7   7   4  137.13   38.36
   7   7  -4   84.89   27.41
  -7  -7  -4   76.69   22.31
   7   7   4   54.64   17.93
   7  -7   4   88.85   29.93
  -7  -7   4   60.36   22.11
   7  -7  -4   65.54   20.85
  -7   7  -4   90.23   26.33
  -9 -11   2   48.48   16.32
   9  11  -2   78.19   24.03
  -9  11   2   58.10   29.14
   9 -11  -2   58.04   20.99
  -9 -11  -2   74.92   20.36
   6 -17   2   91.11   33.29
  -6 -17  -2   66.72   19.24
   6 -17  -2   64.26   23.42
  -6  17  -2   71.55   27.64
   6  17  -2   54.11   20.39
  -6 -17   2   44.51   17.01
  -6  17   2   95.38   33.45
   9  13  -1   25.92   15.53
  -9  13  -1   -1.65   12.33
   9 -13  -1   45.86   23.73
   9 -13   1   24.32   17.64
  -9 -13  -1   22.11   11.42
   9  13   1   24.12   11.15
  -9 -13   1   -3.98    9.67
  -9  13   1   22.27   12.76
  11  -6   0   15.35   13.27
  11   6   0    9.43   13.00
 -11   6   0    6.27   14.64
 -11  -6   0   -3.06   10.05
  -7  17  -1   -3.67   13.78
   7 -17  -1   26.24   18.85
   7  17  -1    7.85   11.35
  -7 -17  -1    9.32   12.97
   7  17   1  -11.28   11.25
  -7 -17   1    7.46    7.83
   7 -17   1    2.56   14.86
  -1 -22   0   21.43   12.38
   1  22   0   19.39   13.73
  -1  22   0    7.18   13.48
  -6  10  -4   68.72   25.04
  -6 -10   4  104.38   29.91
   6  10   4   54.16   17.90
   6 -10   4  105.92   30.05
  -6 -10  -4   82.53   22.71
   6  10  -4   90.42   29.92
   6 -10  -4   86.81   23.64
  -6  10   4  106.06   32.58
  10  10  -1  165.38   32.19
 -10 -10   1  101.11   27.27
 -10 -10  -1  169.92   31.44
 -10  10  -1   98.49   35.96
  10 -10  -1   79.46   24.46
 -10  10   1  106.88   33.34
   3  21  -1   -0.25    8.79
   3  21   1   22.39   16.70
  -3 -21   1   18.96   13.41
   3 -21  -1    2.77    9.71
  -3 -21  -1    0.56    8.51
  -3  21  -1   29.41   19.94
  -5   0   5    6.45   15.07
   5   0   5    0.47   15.17
   5   0  -5   -2.45   10.48
  -5   0  -5    9.40   14.22
   5  -1  -5    4.68   12.82
   5   1   5   38.23   22.18
  -5   1  -5   33.53   18.51
  -5  -1  -5    1.99    9.02
   5   1  -5   10.63   14.56
  -5   1   5   52.79   25.39
   5  -1   5   26.81   17.86
  -5  -1   5   21.12   17.90
  -5 -12  -4    7.62    9.75
   5  12  -4   48.58   22.96
   5 -12  -4   49.12   21.38
  -5 -12   4   58.80   27.84
  -5  12   4   46.74   23.05
   5  12   4   22.52   16.89
   5 -12   4   13.76   13.07
  -5  12  -4   32.75   18.79
  -4  17   3  125.40   35.39
   4  17  -3   69.40   21.06
  -4 -17  -3  101.27   27.91
  -4 -17   3   81.52   26.52
   4 -17  -3   85.63   22.44
 -11  -5  -1  167.28   34.24
  11   5  -1  128.06   35.08
 -11   5  -1   99.36   28.37
  11  -5  -1   86.34   27.92
 -11   5   1   96.24   26.45
   5 -16   3   25.65   17.73
  -5 -16   3   24.80   13.79
   5  16  -3   47.61   20.55
  -5 -16  -3   11.61   11.06
  -5  16  -3    5.39   10.75
   5 -16  -3   56.94   20.62
   4   6   5   35.21   16.68
  -4  -6   5    5.08   15.47
  -4   6   5   47.13   28.70
  -4   6  -5   38.49   19.30
   4  -6   5   -1.45   12.01
  -4  -6  -5   41.74   20.52
   8   0  -4   75.88   27.42
  -8   0   4   65.03   24.99
   8   0   4   92.08   30.33
  -8   0  -4   98.23   26.10
  -2   9   5   13.64   24.87
  -2  -9  -5    7.50    8.13
   2   9   5    5.79   13.39
  -2   9  -5   -1.45   10.58
   2  -9   5   -7.67    7.38
  -5 -20   0    7.70    8.06
   5 -20   0    0.04   16.35
  -5  20   0    7.41   12.97
   5  20   0    2.23    9.15
   8   1   4   47.92   21.02
  -8  -1  -4   58.90   20.56
  -8   1  -4   48.69   19.13
   8  -1   4   44.02   20.86
  -8   1   4   39.85   22.16
   8   1  -4   64.75   26.24
   8  -1  -4   42.42   21.87
  10  11   0    8.69    9.86
 -10 -11   0  -22.38   16.56
  10 -11   0    3.49   10.88
 -10  11   0   13.51   19.75
   9   7  -3  114.75   32.24
   9   7   3   79.83   21.72
   9  -7  -3  100.41   25.88
  -9  -7  -3  129.66   27.60
   9  -7   3  117.38   32.94
  -9   7  -3  121.12   28.98
  -9   7   3  176.01   40.29
   2  15   4   22.37   18.50
  -2  15   4   11.00   17.18
   2 -15  -4    4.95    9.69
   2  15  -4   -0.56    8.61
  -2 -15  -4   13.96   13.03
  -2 -15   4   33.87   21.81
  -5  -2  -5   64.76   21.53
  -5   2  -5   39.01   17.66
   5   2  -5   52.94   20.22
  -5   2   5   62.87   28.49
   5  -2  -5   66.96   21.27
   5   2   5   27.64   13.75
   5  -2   5   37.53   16.15
  -5  -2   5   38.99   17.78
   8  16   0   20.38   11.79
   8 -16   0   26.87   21.93
  -8 -16   0  -10.33   10.27
  -8  16   0  -11.57   14.59
  -7  13   3   33.11   22.03
  -7 -13   3    0.11    9.83
   7 -13  -3   17.32   14.61
  -7 -13  -3   13.35   11.18
  -7  13  -3    4.70   10.91
   7  13  -3   33.70   21.19
  -3   8   5   20.56   29.43
  -3   8  -5   18.80   16.37
   3  -8   5    5.58   13.76
   3   8   5   11.75   14.34
  -3  -8  -5   -8.23   14.52
   6  19   0    9.29    8.93
   6 -19   0   18.82   17.86
  -6  19   0    8.13   10.22
  -6 -19   0    9.94   10.79
  -8   2   4   -0.40   13.61
   8  -2   4   39.40   23.42
   8   2  -4   29.38   20.78
   8  -2  -4   10.24   13.59
  -8   2  -4   29.75   17.59
  -8  -2  -4    9.40   13.68
   8   2   4   23.40   16.28
  -3 -20  -2   39.85   16.67
   3  20  -2   34.09   16.38
  -3 -20   2   27.34   17.93
   3 -20  -2   28.56   12.41
  -3  20  -2   50.31   22.15
   3 -20   2   31.09   18.78
  -3  20   2   43.05   24.33
   3  20   2    7.14    9.95
   0  10  -5  -11.86   13.96
   0  10   5   18.11   19.51
  -9  14   0    1.09   18.82
  -9 -14   0   22.43   14.97
   9  14   0   14.78   12.51
   9 -14   0    5.94   13.03
  -8 -14   2   59.18   19.70
   8  14  -2   95.22   25.24
   8 -14  -2   82.48   24.43
  -8  14  -2  126.64   34.85
  -8  14   2  144.11   40.31
  -8 -14  -2   85.33   22.51
   2  22   0   43.72   19.78
  -2 -22   0   28.50   13.56
  -2  22   0   18.40   14.66
   5   3  -5    4.57   11.06
  -5   3  -5    2.49    9.09
  -5   3   5   53.71   28.00
   5   3   5   21.26   18.91
   5  -3   5   -1.71   12.74
  -5  -3  -5   26.72   14.23
   5  -3  -5   19.01   14.68
   0 -22   1    0.28    9.44
   0  22  -1    3.68   10.81
   0  22   1  -19.87   16.97
  11  -7   0   77.85   25.35
  11   7   0  117.01   30.43
 -11  -7   0  159.90   33.87
 -11   7   0   66.02   25.13
  10  -8  -2   34.93   16.65
 -10  -8  -2   40.42   16.98
  10   8  -2   16.93   15.77
 -10   8   2   44.24   15.77
  -3  18   3  -15.09   17.42
   3  18  -3   14.66   13.02
   3 -18  -3   13.85   11.52
  -3 -18   3   -9.92   14.69
   3 -18   3   20.64   19.45
  -3 -18  -3   13.08   14.04
   4 -21   0    2.97   12.29
  -4 -21   0    0.73    8.44
   4  21   0   12.26   11.03
   1  10   5   23.36   18.81
   1  10  -5    3.44   12.29
  -1  10  -5  -14.91   16.96
  -1  10   5   26.39   23.55
   7  -8   4   36.24   23.69
   7   8   4   18.80   11.17
  -7   8   4   42.17   18.91
   7   8  -4   26.22   19.46
  -7  -8  -4   30.56   12.52
  -7  -8   4   -4.40   14.13
   7  -8  -4   29.77   16.56
  -7   8  -4   17.33   13.14
   8   3   4   27.24   16.30
  -8   3   4   15.73   16.24
   8  -3  -4   35.70   21.39
   8   3  -4   25.71   21.41
  -8   3  -4   49.31   20.34
  -8  -3  -4   48.52   21.45
   8  -3   4   20.14   13.94
  -6  15   3   71.27   31.90
  -6 -15  -3   64.83   21.84
   6  15  -3   33.47   16.94
   6 -15  -3   34.69   16.46
  -6  15  -3   43.32   19.68
   6 -15   3   93.59   37.57
  -6 -15   3   57.38   20.52
   7 -16  -2   -2.93   11.06
  -7 -16  -2   30.10   18.13
  -7 -16   2   -1.85   10.34
   7  16  -2  -10.24   14.23
  -7  16  -2   -4.53   16.72
  -7  16   2    5.51   19.49
   8 -11   3   37.05   29.31
   8 -11  -3   13.33   12.25
  -8 -11   3    8.69   12.12
  -8  11   3  -11.25   17.88
   8  11  -3   20.11   15.87
  -8 -11  -3   14.83   10.53
 -11   6  -1   52.49   22.90
 -11   6   1   68.72   25.45
  11  -6  -1   70.98   26.12
 -11  -6  -1  132.98   31.06
  11   6  -1  132.85   35.41
   1 -22   1   28.04   13.73
   1  22   1   20.93   15.84
  -1  22  -1   60.57   23.04
  -1  22   1   61.57   23.45
   1  22  -1   77.53   26.94
  -1 -22   1   65.36   22.07
   0 -19   3   27.77   20.35
   0 -19  -3    8.56    8.13
   0  19  -3   23.40   16.05
   0  21  -2   21.99   16.38
   0 -21   2   -1.21   16.77
  -4   7  -5    7.07   14.16
  -4  -7   5   31.44   23.37
   4  -7   5    2.79   10.55
   4   7   5   16.47   18.02
  -4  -7  -5   12.34   15.45
  -4   7   5   35.56   21.83
  -5   4   5   41.63   26.15
   5   4  -5   -5.97   13.96
   5   4   5   24.54   15.86
  -5  -4  -5   23.90   17.30
  -5   4  -5   20.12   14.09
   5  -4  -5   17.56   13.91
   5  -4   5   -5.56   16.10
  -7 -18   0   13.59   11.66
  -7  18   0   26.85   16.73
   7  18   0   24.72   12.19
   1 -19   3   47.08   25.63
  -1 -19   3  -11.91   14.82
   1  19  -3   41.21   20.88
  -1  19  -3   24.58   14.78
  -1 -19  -3   20.34   11.02
   1 -19  -3   36.06   16.27
  -1  19   3   39.02   17.71
  -1 -21   2   30.02   16.92
   1  21  -2   12.40   13.30
   1 -21   2    5.13   12.63
   1 -21  -2  -14.49   10.87
   1  21   2    0.03   12.74
  -1  21  -2    1.31   17.41
  -8   4   4    4.01   18.35
   8   4  -4   35.35   19.65
  -8  -4  -4   34.76   16.78
   8  -4  -4   62.51   24.07
   8   4   4   39.76   19.59
   8  -4   4  -10.95   16.51
  -8   4  -4   21.84   19.10
  -9  -8  -3   28.17   11.79
  -9   8  -3   59.64   22.53
   9  -8  -3   30.20   15.51
   9   8   3   35.52   14.40
  -9   8   3   32.93   16.70
   9   8  -3   30.46   20.81
   9  -8   3    0.32   21.13
  -5 -20   1   14.24    8.56
   5  20   1    4.29    8.60
   5 -20   1   14.93   15.84
  -5  20   1   26.79   17.86
   5  20  -1  -11.20   10.10
  -5 -20  -1   -9.89   14.40
  -6 -11  -4    7.81    9.37
   6 -11   4  -16.55   22.29
  -6 -11   4    8.06   14.78
   6  11  -4   52.04   25.92
  -6  11   4   -6.54   22.87
   6 -11  -4   58.97   24.14
  -6  11  -4   22.59   16.04
   6  11   4   23.46   15.07
  -9 -12  -2  149.12   29.27
  -9 -12   2   96.99   23.85
   9 -12  -2  153.95   34.34
  -9  12   2  207.30   48.67
   9  12  -2  155.45   34.07
 -10 -11   1   12.05   12.50
 -10  11   1    8.03   15.28
  10 -11  -1   36.22   20.29
 -10 -11  -1   60.78   21.89
  10  11  -1   62.52   21.87
 -10  11  -1   65.64   28.90
  -4  14   4   -4.12   17.83
   4 -14  -4   27.57   17.52
  -4 -14   4  -25.75   18.66
  -4 -14  -4    3.52    9.59
  -4  14  -4  -17.95   16.61
   4  14  -4   33.42   18.22
   4  14   4    0.20   13.24
   0 -16   4  -26.85   22.10
   0  16   4  -30.85   23.08
  -8  16  -1   53.73   26.52
   8  16  -1  -19.93   12.53
   8 -16  -1  -36.75   20.23
   8  16   1   12.66    9.52
  -8  16   1   25.08   21.96
   8 -16   1   15.89   18.80
  -8 -16   1   12.18   10.86
  -8 -16  -1   46.20   19.10
  -6 -19   1   17.39   12.39
   6 -19   1   44.26   27.63
   6 -19  -1   39.57   21.57
   6  19   1   38.65   18.24
  -6  19  -1   47.13   22.90
  -6  19   1   94.49   33.24
  -6 -19  -1   33.39   18.71
   6  19  -1   31.70   13.70
  -3  -9  -5   63.42   23.52
  -3   9  -5   30.18   21.14
  -3   9   5   19.14   18.77
   3  -9   5    9.54    9.04
   3   9   5   -4.41   11.56
   2  10   5   20.94   19.30
  -2  10   5   68.34   34.42
  -2 -10  -5   53.11   20.48
  -2  10  -5   69.36   24.81
  -3  15  -4   64.59   24.72
   3  15  -4    6.40    9.50
  -3 -15  -4   43.98   21.70
   3  15   4    9.90   13.24
  -3 -15   4   18.41   13.87
   3 -15  -4   10.10   13.51
   1  16   4   15.27   16.26
   1 -16   4   28.18   21.71
  -1  16   4   64.77   32.96
  -1 -16   4   -4.33   17.95
   9  14  -1   18.02   13.52
  -9 -14   1   13.20   13.36
  -9  14   1   -7.04   19.01
  -9 -14  -1    6.69    8.79
   9 -14  -1   33.79   17.21
  -9  14  -1   55.89   28.35
   2  22  -1   29.86   18.24
  -2 -22   1   33.17   17.85
   2  22   1    4.54   11.91
  -2 -22  -1   15.06   12.12
  -2  22  -1   53.95   26.87
 -11   0  -2    7.19   11.42
  11   0  -2   23.08   19.22
  11   0   2   -1.54   14.84
 -11   0   2   47.10   20.42
  11   8   0  188.62   36.95
  11  -8   0  121.03   30.37
 -11   8   0  180.36   41.15
 -11  -8   0  225.94   37.78
  -5  -5  -5   27.72   18.12
   5  -5   5  -14.63   17.59
   5   5   5  -12.58   10.41
  -5   5  -5   30.92   17.11
   5   5  -5    0.21   13.09
  11  -1  -2   34.19   20.69
  11   1   2   10.81   11.76
 -11  -1  -2   12.01   19.08
  11   1  -2   47.18   22.83
  11  -1   2    4.72   13.40
 -11   1   2    6.04   13.53
  10   0   3   86.00   25.97
  10   0  -3  150.77   36.74
 -10   0  -3  117.42   29.35
 -11  -7  -1   69.85   25.88
  11  -7  -1   -0.30   11.27
 -11   7   1  -22.44   21.36
  11   7  -1   42.75   20.47
 -11   7  -1   24.22   19.61
   5  13   4  -10.61   14.81
  -5  13   4   47.37   23.69
  -5 -13  -4   -6.32   12.26
  -5  13  -4   32.23   18.99
   5 -13   4   25.66   20.16
   5 -13  -4   23.79   15.35
   5  13  -4   22.90   18.20
  -5 -13   4   11.25   13.23
  -4 -21   1    4.75   10.53
  -4 -21  -1   15.09   13.65
   4  21  -1   14.08    9.69
   4  21   1    5.25   10.13
   4 -21  -1   20.35   17.12
  10  -1  -3   97.90   32.44
  10   1  -3   61.29   29.17
 -10  -1  -3   28.04   15.15
 -10   1  -3   40.76   21.88
 -10   1   3   12.71   12.93
  10  -1   3   32.59   18.24
  10   1   3   16.31   13.62
 -10  12   0   29.40   23.67
 -10 -12   0  -26.81   18.32
  10  12   0   -4.32    8.28
  10 -12   0   12.24   16.04
 -10   9   2  164.60   40.05
  10  -9  -2  113.85   29.57
  10   9  -2   92.90   26.55
 -10  -9  -2  108.87   26.28
  -3 -22   0  135.20   27.77
   3  22   0  127.83   29.69
  -5 -19  -2   73.18   23.77
   5  19  -2   53.21   20.45
  -5  19   2   79.37   30.66
   5 -19   2   24.19   19.01
   5  19   2   43.41   16.23
  -5 -19   2   27.91   14.87
   5 -19  -2   57.68   22.20
   8   5  -4   10.31   15.54
   8  -5   4   14.76   16.39
  -8   5   4   30.36   21.60
   8  -5  -4   40.50   20.59
  -8   5  -4   42.52   20.68
  -8  -5  -4   38.70   17.42
   8   5   4   23.51   12.87
  -7  -9   4   11.25   13.84
   7  -9  -4   -6.18   13.10
   7   9  -4    5.08   14.05
  -7  -9  -4   -9.90   12.07
  -7   9  -4  -23.26   21.11
  -7   9   4   18.58   18.52
   7   9   4   -2.87    9.28
   0  11   5   20.61   18.24
   0  11  -5   26.64   18.47
  11   2  -2   71.18   27.04
  11   2   2   34.21   13.76
  11  -2  -2   73.46   26.21
  11  -2   2   63.22   25.07
 -11  -2  -2   32.30   19.19
 -11   2   2   41.90   21.05
  -2 -19   3   18.89   18.34
   2 -19   3   26.31   19.45
   2 -19  -3    9.07   12.39
   2  19  -3   13.76   13.79
  -2  19   3  -19.26   21.78
   2 -21  -2    4.28   10.67
  -2 -21   2   -6.08   14.29
   2  21  -2   20.38   15.74
  -2  21  -2    8.41   15.48
   2  21   2    2.27   11.96
  10  -2   3   11.43   10.45
  10  -2  -3   60.61   27.95
  10   2   3   15.34   14.23
 -10  -2  -3   66.93   25.90
 -10   2   3    8.68   16.85
  10   2  -3   49.89   23.03
 -10   2  -3    8.36   10.85
  -4  -8  -5  -20.75   15.19
  -4  -8   5   -2.82   21.92
   4  -8   5    3.28   11.63
  -4   8   5   14.27   22.81
   4   8   5   11.71   14.76
  -4   8  -5   41.89   22.80
  -7 -14   3  -23.82   15.79
   7  14  -3   18.52   14.52
   7 -14   3   31.14   22.71
  -7  14   3   28.81   25.23
  -7 -14  -3    0.50   11.60
   7 -14  -3   -3.83   11.35
  -6 -18  -2   43.16   20.62
   6 -18  -2   22.99   14.85
  -6 -18   2   28.50   16.34
   6  18  -2   13.82    8.61
  -6  18   2   47.78   32.20
  -1  11  -5   -8.97   16.46
  -1  11   5   -7.79   22.27
   1  11   5   26.71   15.66
   7  18  -1    7.72   11.01
  -7  18  -1    1.36   13.59
  -7 -18  -1   31.35   16.30
   7 -18  -1    2.37   12.30
  -7 -18   1    6.55   10.91
   7  18   1   -1.19    7.89
  -7  18   1   25.63   18.05
   7 -18   1   -4.05   15.57
   4  20  -2   20.26   14.82
   4 -20  -2  -12.49   15.77
  -4  20  -2   21.97   21.24
  -4 -20  -2   50.25   21.95
  -4 -20   2   20.65   14.46
  -4  20   2    8.14   17.85
   4  20   2    1.94   13.86
 -11  -3  -2   73.07   28.56
  11  -3  -2   89.47   32.58
  11  -3   2   35.14   21.18
  11   3  -2   95.33   30.97
  11   3   2   36.61   17.78
 -10   3   3   57.48   23.34
 -10  -3  -3   45.12   21.22
  10   3  -3   85.75   29.90
 -10   3  -3   54.79   21.01
  10   3   3   49.00   19.17
  10  -3   3   55.44   19.81
  10  -3  -3  107.71   30.39
  -2  16   4   -9.29   14.67
  -2 -16   4    7.96   15.06
   2  16  -4    3.11    7.79
   2  16   4  -18.19   19.82
   5  17  -3  -11.56   12.84
   5 -17  -3    1.55   10.43
  -5 -17   3  -12.18   17.36
  -5 -17  -3   18.05   14.79
  -5  17   3   -4.00   22.12
  -8 -12   3   19.75   12.02
   8  12  -3   19.54   17.17
  -8 -12  -3    9.56    7.79
   8 -12  -3   19.74   11.15
  -8  12   3   16.23   18.64
   8 -12   3  -13.70   29.96
  -9   9   3   10.58   22.47
  -9  -9  -3   10.02    8.89
   9   9  -3   12.12   13.67
   9  -9  -3    8.49   11.31
   9  -9   3    2.68   18.34
   5   6   5    3.35    9.80
  -5   6  -5   45.69   20.34
   5  -6   5   28.73   18.17
  -5  -6  -5   67.86   25.41
  -4 -18   3   76.20   28.45
  -4 -18  -3   86.98   26.02
   4 -18  -3   92.51   25.09
   4  18  -3   79.50   25.35
  -4  18   3   96.44   32.45
   4 -18   3  124.70   32.20
  -9  15   0   35.19   19.44
   9 -15   0   95.60   32.15
  -9 -15   0   34.78   14.66
   9  15   0   64.88   19.20
   8  15  -2   25.23   17.04
  -8 -15   2   -3.63   10.88
  -8  15   2   28.90   32.78
  -8 -15  -2    8.32   11.75
  -8  15  -2  -18.94   20.40
  -8 -17   0   65.40   22.85
   8  17   0   30.91   13.17
   8 -17   0   65.41   28.09
  -8  17   0   83.53   31.01
   8   6  -4   46.13   24.07
   8  -6  -4   27.99   19.66
   8  -6   4   10.65   15.41
  -8   6   4   39.08   22.20
   8   6   4   53.30   20.52
  -8   6  -4   28.38   16.83
  -8  -6  -4   58.10   18.55
   0  23   0   10.22   15.93
  -3  10  -5   12.72   14.20
  -3 -10  -5    6.81   10.89
   3 -10   5   -7.53   11.11
  -3 -10   5   17.73   15.69
   3  10   5    3.85   11.06
  11   4  -2  100.65   32.38
  11  -4  -2  116.14   32.65
 -11  -4  -2   99.86   25.76
 -11   4   2  133.65   31.60
  11  -4   2  139.70   36.44
  11   4   2  120.02   26.93
 -11   8   1   47.99   22.30
 -11  -8  -1   21.77   14.09
 -11   8  -1   38.16   24.56
  11   8  -1   26.83   17.66
  11  -8  -1   44.98   21.33
  -6   0   5   89.70   29.39
   6   0   5   42.40   21.82
  -6   0  -5   67.66   23.52
   6   0  -5   79.54   26.00
  10  -4   3   12.39   12.41
 -10  -4  -3   30.52   15.16
  10   4  -3   34.33   21.94
  10  -4  -3   46.34   23.99
  10   4   3    9.14    8.50
 -10   4  -3   38.29   21.59
  11   9   0    9.17   18.07
 -11  -9   0  -15.14   15.30
 -11   9   0   -6.97   15.38
  11  -9   0   18.49   13.75
  -6   1   5   70.74   31.16
   6  -1   5   56.53   27.61
   6   1   5   20.17   16.77
   6   1  -5   43.72   22.23
  -6   1  -5   41.68   17.94
   6  -1  -5   58.47   23.35
  -6  -1  -5   34.74   17.67
  -6 -12   4   15.28   14.76
   6 -12  -4   52.96   21.89
  -6 -12  -4   46.65   19.13
  -6  12  -4   12.21   15.97
  -6  12   4    8.83   17.34
   6  12  -4   47.90   25.44
   6  12   4   23.41   13.60
   1  23   0    4.98   12.67
  -1 -23   0   -4.54    8.61
  -1  23   0   21.82   21.42
 -10 -12  -1   28.96   16.77
  10  12  -1  -17.53   15.79
 -10 -12   1  -11.48   12.74
 -10  12  -1   21.91   21.48
  10 -12  -1   26.81   18.57
 -10  12   1   -9.88   21.43
  -2 -11   5   -5.52   14.57
  -2 -11  -5  -13.82   10.28
   2  11   5   10.34   13.68
  -2  11   5   32.26   25.64
  -2  11  -5    6.83   11.27
  -6 -16   3   27.32   18.58
   6 -16   3   55.77   43.57
  -6  16   3   19.82   21.41
   6  16  -3   36.25   21.95
  -6 -16  -3   -0.28    8.60
   6 -16  -3   33.82   18.13
  -3  22  -1    9.02   13.72
   3 -22  -1    9.76   10.25
   3  22  -1    4.31   10.23
  -3 -22  -1    1.48    9.07
   3  22   1    3.83    9.86
  -3 -22   1    6.64   10.10
  -5 -21   0   20.62   14.77
   5  21   0    2.97    9.04
   5 -21   0   -2.10   15.79
   6  20   0    3.74    7.34
   6 -20   0   21.91   14.57
  -6 -20   0   41.46   19.27
  -9  13   2    7.88   22.84
  -9 -13   2  -30.34   17.60
   9 -13  -2   13.62   18.41
   9  13  -2  -23.23   17.06
  -9 -13  -2    9.68   12.38
  -7 -17  -2   -5.88    9.31
  -7  17  -2   -2.77   14.83
   7 -17  -2    8.71   11.92
  -7 -17   2   11.26   10.90
   7  17  -2   -1.12   11.40
  -7  17   2   46.76   27.58
   6   2  -5   20.55   17.55
   6  -2  -5   31.12   17.86
  -6  -2  -5   18.04   14.85
   6   2   5   -0.84   10.81
  -6   2   5   16.44   19.11
  -6   2  -5   33.82   18.19
   6  -2   5    5.76   11.00
 -10  10   2   49.04   22.68
 -10 -10   2   13.75   10.23
 -10 -10  -2   28.35   14.20
  10 -10  -2   30.51   20.49
  10  10  -2    9.49   12.91
  -7  10   4   17.85   16.16
   7  10   4   19.92   13.51
   7 -10  -4   23.68   17.83
  -7  10  -4    3.95   13.05
  -7 -10   4   21.67   17.33
   7  10  -4   24.94   15.47
   7 -10   4   31.12   23.13
  -7 -10  -4  -12.87   13.32
 -12   0   0   28.79   19.10
   3  19  -3   43.62   22.96
   3 -19   3   68.87   29.49
   3 -19  -3   37.25   16.00
  -3 -19   3   69.75   26.94
  -3 -19  -3   51.55   20.71
  -3  19   3   88.41   30.77
  -4  -9   5   81.61   32.09
  -4   9  -5   42.93   21.89
  -4   9   5   38.23   24.95
   4   9   5   35.87   18.72
  -4  -9  -5   38.06   19.37
   4  -9   5   20.62   14.16
 -12   1   0   11.83   13.83
 -12  -1   0   59.28   23.81
  -3 -21   2  -22.21   15.84
   3  21   2   15.48   19.45
   3 -21  -2    4.99   11.09
  -3  21  -2   25.62   19.78
   3  21  -2    3.21   12.60
  -3 -21  -2   15.45   12.53
  -4 -15   4    3.17   15.68
   4 -15  -4   21.85   14.07
  -4  15  -4  -15.24   17.33
  -4  15   4   27.42   22.99
   4  15   4   -3.50   14.88
   4  15  -4   31.50   17.47
  -4 -15  -4   32.79   19.46
  -5  -7  -5   13.49   16.34
  -5   7  -5   16.20   15.39
   5  -7   5  -19.08   12.07
  -5   7   5  -39.66   33.73
   5   7   5    4.65   11.61
 -11   5   2   -2.08   12.95
  11   5  -2   28.91   22.30
  11  -5  -2   36.52   22.39
 -11  -5  -2   21.32   17.65
  11  -5   2   30.52   21.51
  -6  -3  -5   16.13   16.67
  -6   3  -5   13.27   16.02
  -6   3   5  -13.36   21.29
   6   3   5    4.38   13.68
   6  -3   5   10.45   14.22
   6  -3  -5   -2.42   14.44
   6   3  -5   14.52   14.59
  10   5   3   26.55   16.58
 -10  -5  -3   -3.19    8.95
  10  -5  -3   13.44   17.71
 -10   5   3   -9.66   13.41
  10   5  -3   -3.16   14.18
  10  -5   3   19.22   16.77
 -12   2   0  -19.11   16.83
   0  12  -5    3.88   16.99
   0  12   5  -21.31   19.16
   8   7   4   18.67   16.39
   8  -7  -4   58.51   22.11
  -8   7  -4   31.14   15.91
  -8  -7  -4   35.72   16.53
   8   7  -4   36.50   20.06
   8  -7   4  -35.72   27.72
  -8   7   4   20.35   19.04
 -10  13   0   -4.09   15.97
  10 -13   0  -20.42   16.66
 -10 -13   0   39.51   18.59
  10  13   0    9.98   11.95
   9 -15  -1   -5.49   13.30
   9  15  -1  -26.74   14.57
  -9  15  -1  -15.56   18.43
  -9  15   1   42.37   29.39
  -9 -15   1   18.26   14.64
  -9 -15  -1  -11.26   13.86
   0 -20  -3    5.52   10.55
   0 -20   3   46.47   28.30
   0  20  -3   21.80   16.27
   0 -17   4  -12.40   16.72
   0  17   4   36.08   24.81
   5 -14  -4   21.88   14.28
  -5 -14  -4   63.92   24.69
  -5 -14   4   30.07   21.36
  -5  14  -4   43.57   21.43
   5  14  -4   44.67   22.47
  -5  14   4   71.53   29.66
   8 -17   1   13.81   20.19
   8 -17  -1   15.00   14.42
   8  17  -1   -5.54   12.27
  -8  17  -1    1.30   12.12
  -8  17   1    1.90   17.57
  -8 -17   1    5.44    9.42
  -8 -17  -1   36.63   18.18
   8  17   1    5.45    8.43
   4  22   0   12.05   13.94
  -4 -22   0    8.71    9.86
   4 -22   0    6.78   14.91
  -7 -19   0    1.99    9.69
   7  19   0   -0.36    8.28
   7 -19   0   11.18   17.49
  -7  19   0   -2.89   14.47
   3  16  -4   25.09   14.96
   3 -16  -4   13.61   12.85
  -3  16   4   31.40   23.98
  -3 -16   4  -12.24   19.22
   2  23   0   16.09   12.94
  -2  23   0  -14.04   19.01
  -2 -23   0   20.98   13.39
   0 -23   1   13.53   14.88
   0  23   1  -13.22   15.17
   0  23  -1    8.41   15.96
  -1  12  -5   49.03   22.48
  -1  12   5  107.23   38.42
   1  12   5   53.73   24.70
   9  10  -3    3.83   12.83
   9 -10   3    9.48   17.29
   9 -10  -3    6.95   13.16
  -9  10   3  -15.71   16.67
  -9 -10  -3    6.51   11.68
 -12   3   0   80.71   29.32
  -1 -20   3  -31.42   28.36
   1 -20   3   15.96   21.09
   1 -20  -3   11.31   11.33
   1  20  -3    7.63   12.12
  -1 -17   4   34.29   25.42
   1 -17   4   74.46   30.97
   1  17   4   17.30   13.94
  -1  17   4   53.35   29.21
   6   4   5   74.54   27.85
   6   4  -5   46.97   24.63
  -6   4  -5   45.81   20.08
  -6  -4  -5   54.53   20.62
   6  -4  -5   40.17   20.97
  -6   4   5   99.15   37.76
   6  -4   5   70.94   28.16
   0 -22   2   24.71   19.18
   0  22  -2   46.20   23.26
 -11   9   1    0.04   17.40
  11  -9  -1   35.93   19.39
 -11  -9  -1   66.48   24.10
  11   9  -1   45.15   20.91
 -11   9  -1   19.18   17.43
   1  23   1   47.78   21.60
  -1  23   1   12.85   11.44
  -1  23  -1    9.55   15.83
   1  23  -1   42.08   22.23
  -1 -23   1   21.84   14.51
   5  21   1   33.75   16.60
   5  21  -1   27.04   12.09
   5 -21  -1   35.56   17.93
  -5 -21   1   -3.52   11.15
  -5 -21  -1   67.11   26.18
   6  20  -1   23.09   14.41
   6 -20  -1   18.43   16.39
   6  20   1   -2.19    8.44
   6 -20   1  -22.18   25.02
  -6 -20  -1   21.31   14.93
  -6  20   1   21.55   14.75
  -6 -20   1   13.51   11.54
  -8  13   3   74.14   35.25
  -8 -13   3   19.03   13.99
   8  13  -3   51.66   20.60
   8 -13  -3   29.15   16.87
  -8 -13  -3   36.36   13.72
   8 -13   3   84.54   39.84
   7 -15   3   64.72   29.55
  -7 -15   3   22.08   13.34
  -7 -15  -3   53.80   19.68
   7 -15  -3   35.29   15.74
   7  15  -3   25.91   19.76
  -7  15   3  106.60   40.89
  11  -6   2   45.94   25.39
 -11  -6  -2   84.20   27.46
  11  -6  -2   30.92   21.43
 -11   6   2   32.16   22.12
  11   6  -2   29.26   18.46
  -1 -22   2   50.65   24.06
   1 -22   2   33.50   22.82
   1  22   2   68.26   24.07
   1 -22  -2   10.08   12.28
   1  22  -2   -4.05   16.34
  11 -10   0  -24.72   16.12
 -11  10   0    5.41   17.06
 -11 -10   0    3.73   13.72
  11  10   0    2.46    9.83
  -3 -11   5   24.07   22.42
   3  11   5  -21.23   19.36
  -3  11   5    1.68   18.66
  -3  11  -5   33.69   20.49
  -3 -11  -5    2.75   11.20
  10  -6  -3   84.35   27.55
  10  -6   3   27.97   16.83
  10   6   3   37.65   17.40
  10   6  -3   83.25   28.14
 -10  -6  -3   73.67   24.77
  12   0   1  110.10   33.99
  12   0  -1   66.05   29.89
 -12   4   0   24.24   17.22
 -12   1   1   36.39   18.23
  12  -1  -1   82.69   28.92
  12   1   1   97.22   33.51
  12   1  -1  101.77   32.59
   5   8   5   16.41   16.85
  -5   8   5   73.26   34.76
  -5  -8   5   74.46   32.51
  -5  -8  -5   60.47   24.89
   5  -8   5   56.62   22.42
  -5   8  -5   31.50   20.59
   2  12   5  -39.61   23.52
  -2  12   5   36.48   23.81
  -2 -12   5   33.98   25.15
  -2  12  -5   15.19   18.10
  -9   0  -4  -13.56   14.93
   9   0   4    2.60   10.78
   9   0  -4    1.91   14.66
  -6  -5  -5   98.00   28.40
   6  -5   5   38.46   21.94
   6   5   5   76.16   24.62
  -6   5  -5   64.61   23.48
  -5 -20   2   45.39   18.43
  -5 -20  -2   53.11   20.45
   5 -20  -2   16.25   13.14
   5  20  -2   33.10   16.09
  -5  20   2   64.42   35.24
  -4  10  -5   15.71   11.93
   4 -10   5   10.41   14.52
  -4  10   5   12.79   18.58
  -4 -10  -5   36.13   17.96
   4  10   5    8.80   10.75
  -8   8   4   22.73   22.85
   8   8   4    3.73    8.95
   8  -8  -4   37.76   18.14
  -8   8  -4  -18.74   20.75
   8   8  -4   33.19   21.55
  -8  -8  -4   60.04   21.45
  12   2  -1   14.92   24.09
 -12   2   1   30.58   18.58
  12  -2  -1   35.17   22.97
   9   1  -4    6.52   13.22
  -9  -1  -4   -1.14    9.99
   9   1   4   24.60   16.69
   9  -1  -4   -9.54   10.34
   9  -1   4  -10.33   17.18
   6 -13   4   20.37   17.03
  -6 -13   4  -18.59   17.05
  -6 -13  -4   23.55   14.41
  -6  13  -4  -27.41   17.58
   6  13  -4   -2.30   19.44
   6 -13  -4   11.22   10.31
  -6  13   4  -31.83   26.24
 -10  11   2   12.24   16.88
  10  11  -2    1.96    9.62
 -10 -11  -2   24.18   14.23
  10 -11  -2   11.85   13.28
 -10  13  -1   78.26   28.06
 -10  13   1   57.20   29.48
  10  13  -1   63.61   22.56
  10 -13  -1   61.96   24.32
 -10 -13  -1  119.52   28.29
 -10 -13   1   66.08   24.10
   2  20  -3   56.52   22.67
   2 -20   3   46.94   27.05
  -2 -20   3   19.66   20.09
   2 -20  -3   33.63   17.56
  -7 -11   4   29.07   20.33
   7 -11   4   46.48   31.00
  -7  11   4   56.89   24.39
   7  11   4   46.48   19.26
  -7 -11  -4   13.09    8.83
  -7  11  -4   19.87   16.49
   7  11  -4   52.56   26.51
  -9  16   0   70.27   30.16
   9  16   0   45.42   15.07
   9 -16   0   91.43   31.16
  -9 -16   0   71.67   23.23
   2 -17   4   10.80   15.53
  -2  17   4    1.07   18.79
  -8  16   2   51.76   25.40
   8  16  -2   19.84   13.31
  -8  16  -2  -12.16   18.19
  -8 -16  -2    6.22   11.71
   8 -16  -2   18.10   15.47
  -8 -16   2   28.01   16.23
  -6 -19   2   17.90   15.96
   6  19  -2   17.57   11.78
  -6  19   2   14.61   19.08
   6 -19  -2   14.93   16.28
  -6 -19  -2   41.70   20.62
   4  22   1   -0.37    9.46
  -4 -22  -1   16.30   14.93
   4 -22  -1   53.81   24.44
   4  22  -1   36.85   17.73
  -4 -22   1   16.84   13.71
   7  19  -1    5.80    7.89
   7 -19   1   18.38   19.88
  -7 -19   1   12.45   10.43
  -7  19   1   -5.89   20.06
   7  19   1   -3.54    9.23
   7 -19  -1    2.05   14.90
  -2  23  -1   27.11   21.10
   2  23   1   21.51   18.53
   2  23  -1   32.34   19.90
  -2 -23   1   -0.25   11.97
  -5 -18  -3   30.80   17.35
  -5  18   3   80.33   32.45
   5  18  -3   61.49   22.65
  -5 -18   3   12.15   10.63
   5 -18  -3   46.00   20.01
   9  -2   4   24.21   16.44
   9   2   4   13.86   13.63
   9  -2  -4   25.66   17.09
   9   2  -4   54.63   27.27
  -9   2  -4   44.00   20.90
  -9  -2  -4   24.80   14.04
  -9  14   2   49.10   33.27
   9  14  -2   20.12   14.66
   9 -14  -2   39.16   22.34
  -9 -14  -2   22.25   14.72
  -9 -14   2   -0.95    9.87
  12   3  -1   36.65   23.87
 -12   3   1   20.23   15.00
  12  -3  -1   24.70   20.87
 -12   5   0    3.88   14.73
   2  22   2   -1.64   15.06
  -2  22  -2   -8.73   20.81
   2  22  -2    3.54   11.67
   2 -22  -2    7.02   14.52
  -2 -22   2   32.19   20.68
  -3 -23   0   -1.51   10.92
   3  23   0   24.70   19.31
   8  18   0   52.36   17.27
   8 -18   0   79.72   30.20
  -8  18   0   45.94   26.76
  -8 -18   0   37.32   16.17
  -4 -19   3   20.93   18.86
   4 -19   3   49.56   25.85
  -4 -19  -3    1.09   12.42
   4 -19  -3   20.70   16.97
   4  19  -3  -32.21   22.07
  11  -7  -2   36.51   21.57
 -11  -7  -2  -12.56    9.49
 -11   7   2   46.64   29.37
  11   7  -2   20.19   16.53
  11  -7   2   17.42   21.46
  -4 -21   2   21.48   17.19
  -4 -21  -2   21.19   16.08
   4 -21  -2   -5.01   11.43
   4  21  -2  -10.34   10.58
   4  21   2   -5.39   11.55
  10   7  -3   60.81   26.50
 -10  -7  -3   22.85   13.34
 -10   7   3   61.61   28.24
  10  -7  -3   77.05   26.00
  10  -7   3   74.12   30.29
   9  -3   4    0.62   10.96
  -9   3  -4   -4.09   15.96
   9   3   4   18.00   14.79
  -9   3   4   18.82   21.81
   9  -3  -4   -3.57   15.12
  -9  -3  -4    4.89    9.38
  -9 -11  -3   39.03   15.90
   9  11  -3   39.49   23.23
   9 -11   3  126.45   45.45
  -9  11   3   82.09   33.22
   9 -11  -3   58.25   23.33
   0  13   5   39.36   26.37
   6 -17  -3   21.87   15.74
   6  17  -3   16.25   13.69
  -6 -17  -3    2.66   10.55
  -6  17   3   30.98   29.46
  -6 -17   3    0.94   10.67
 -11  10  -1    0.18   15.68
  11  10  -1   18.86   14.04
 -11 -10  -1   16.11   12.40
 -11  10   1   34.44   20.18
  11 -10  -1   24.36   17.75
   6   6   5   23.14   16.34
   6  -6   5    3.80   15.08
  -6   6   5   55.36   32.90
  -6  -6  -5   -1.15   12.63
  -6   6  -5    2.99   11.61
 -12   4  -1    7.46   16.51
  12   4  -1   47.81   27.64
 -12   4   1    2.06   13.00
  12  -4  -1   22.26   20.62
  10 -14   0   13.39   15.75
 -10  14   0  -25.92   26.96
  10  14   0   -7.86   10.67
 -10 -14   0   18.51   14.31
  -4 -16   4   18.02   16.70
   4  16  -4   17.65   15.35
  -4  16   4   61.08   30.84
   4 -16  -4   41.46   22.15
  -4 -16  -4   18.75   15.79
  -4  16  -4   30.82   20.31
   1  13   5   24.69   24.60
  -1  13  -5    2.06   16.15
  -1 -13   5   -0.61   20.76
  -1  13   5   17.63   24.24
  -7 -18   2    0.31    8.59
  -7  18   2   59.93   38.91
  -7 -18  -2    9.97   11.93
   7  18  -2   14.54   16.31
   7 -18  -2    6.23   13.75
   5   9   5    5.74   12.01
  -5   9   5   -0.53   21.01
   5  -9   5   25.54   18.10
  -5  -9   5  -31.61   26.43
  -5  -9  -5    8.18   10.77
  -5   9  -5    1.09   15.85
   0   0   6  -35.19   25.74
   0   0  -6   42.50   20.21
 -11  11   0    5.51   13.76
 -11 -11   0   26.61   14.50
   9  -4  -4   19.12   17.49
   9   4   4   19.54   12.62
   9  -4   4    4.13   16.04
  -9   4  -4   -6.88   15.13
  -9  -4  -4    1.22    8.87
   9   4  -4   26.90   22.86
  -5 -15  -4   13.21   12.86
   5 -15  -4   45.59   21.03
  -5 -15   4   60.67   27.87
  -5  15  -4   41.80   20.30
  -5  15   4   56.90   29.06
   5  15  -4   45.20   22.01
   0  -1   6   16.80   22.75
   0   1   6    5.39   17.49
   0  -1  -6   -9.88   12.13
   0   1  -6   31.97   20.59
 -12   6   0   62.26   25.00
   8   9  -4   23.45   22.39
   8   9   4   13.78   12.52
   8  -9  -4    4.09   13.59
  -8   9  -4   26.61   18.91
  -8   9   4   17.06   18.33
  -8  -9  -4  -31.73   17.53
   8  -9   4   51.72   30.49
  -9 -16   1   20.11   13.47
  -9  16   1   34.35   28.46
   9  16  -1   10.97    9.59
  -9 -16  -1   25.27   17.49
  -9  16  -1   32.94   22.93
   9 -16  -1   43.40   22.83
  -3 -12   5   15.50   23.59
  -3  12   5   -7.74   17.25
  -3  12  -5    3.39   12.42
   3  12   5   36.05   20.70
  -6 -21   0   32.05   15.59
   6  21   0   13.41   11.08
  -1   0  -6  -24.33   18.31
   1   0   6   14.11   19.09
  -1   0   6   42.83   30.04
   0  -2   6   23.14   15.55
   0   2  -6  -21.51   17.16
   0   2   6    2.92   20.27
   0  24   0  125.50   32.95
   3 -20   3  -35.86   24.82
   3 -20  -3   -0.59   11.42
   3  20  -3   -3.76   10.10
  -3 -20   3   -8.51   15.71
   1  -1   6   28.45   23.79
  -1  -1  -6   60.71   22.92
  -1   1   6   60.77   33.06
  -1   1  -6   43.14   20.66
  -1  -1   6   26.73   25.60
   1   1   6   32.81   22.91
  -3  17   4   31.29   23.43
  -3 -17   4   10.33   14.37
   5 -22   0  -10.65   19.42
  -5 -22   0   15.07   10.10
   5  22   0   15.29   14.58
  -8 -14   3   38.64   19.02
   8 -14  -3   37.01   19.40
   8 -14   3   91.94   45.91
  -8  14   3   66.24   32.66
  -8 -14  -3   38.58   16.48
   8  14  -3   27.44   21.09
   4  11   5    0.04   11.83
  -4  11   5    9.53   21.30
  -4  11  -5   -0.73   11.95
  -4 -11   5   14.71   21.27
  -4 -11  -5   18.07   17.47
 -12   5  -1   67.34   25.09
  12   5  -1   84.10   31.98
 -12   5   1   84.59   28.76
  12  -5  -1   37.81   20.98
   0 -18   4   84.64   33.44
   3 -23  -1  -13.96   18.98
  -3 -23   1   10.10   15.79
   3  23   1   16.61   16.81
  -3  23  -1    0.04   14.41
   3  23  -1  -18.96   15.91
  -8  18  -1   32.58   25.07
   8  18  -1   10.85   10.32
  -8  18   1   10.55   18.99
  -8 -18   1   19.54   14.88
   8 -18  -1  -22.83   17.91
  -8 -18  -1   -4.87   10.28
  11   8  -2   50.76   21.70
  11  -8  -2   69.21   26.56
  11  -8   2   60.63   27.84
 -11   8   2  102.55   31.96
 -11  -8  -2   55.10   20.04
   1  -2   6   40.19   21.83
  -1  -2  -6   37.26   19.12
   1   2   6   -1.26   16.03
   1   2  -6   -4.63   11.41
  -1  -2   6   46.10   25.90
  -1   2  -6   36.01   19.00
  -1   2   6   32.81   28.97
   1  24   0   11.30   16.37
  -1  24   0   -0.20   16.37
 -10  -8  -3   -5.70   11.44
  10   8  -3    9.93   15.49
  10  -8   3   17.18   18.08
 -10   8   3    7.18   20.91
  10  -8  -3    7.12   10.27
   7   0  -5   20.73   21.13
   7   0   5   -1.77   18.08
  -7   0  -5   28.52   19.26
  -6   7  -5  -21.96   19.13
   6  -7   5   17.25   15.04
  -6  -7  -5    2.99   13.02
   6   7   5   -1.33   14.43
  -6   7   5    0.31   24.68
 -10  12   2    2.13   14.75
  10  12  -2   -9.47   12.68
  10 -12  -2   14.85   19.19
 -10 -12  -2   10.63   11.66
   7   1  -5   43.72   23.99
  -7   1  -5  106.35   30.92
  -7  -1  -5   79.20   25.73
   7  -1   5   47.54   21.93
   7   1   5   43.72   19.74
   7  -1  -5   81.37   26.93
  -7  12  -4   21.87   16.38
  -7 -12   4   40.24   23.58
  -7  12   4   47.87   23.23
   7 -12  -4   38.73   19.15
   7  12  -4   35.73   22.12
  -7 -12  -4   22.93   17.17
   0   3   6   14.92   25.43
   0   3  -6   13.55   15.36
   0  -3   6   23.98   19.83
   3 -22  -2   59.76   19.93
  -3 -22   2   59.23   25.88
   3  22   2   88.40   28.62
   3  22  -2   85.29   25.68
  -3  22  -2   80.10   27.80
  -2 -13   5   35.94   23.88
   2  13   5   -4.23   13.64
  -2  13  -5   40.19   23.30
  -2  13   5   36.00   27.89
  -9   5  -4   28.51   18.26
   9  -5  -4   11.31   11.83
  -9   5   4   16.53   20.90
  -9  -5  -4   -1.84   10.15
   9  -5   4   -6.04   14.11
   9   5  -4   11.36   16.15
   9   5   4   -2.65    8.09
  -7 -16  -3   -2.67   12.44
   7  16  -3   34.93   21.05
  -7  16   3   16.64   25.31
  -7 -16   3    3.48   11.16
   7 -16  -3   19.29   14.14
   1 -18   4  -27.77   24.49
  -1  18   4   28.37   24.41
  -1 -18   4   53.82   29.14
  -7 -20   0    5.80   10.87
   7 -20   0   18.68   18.72
   7  20   0   21.97   14.06
   7  -2   5   13.53   13.09
   7   2  -5   16.27   17.57
   7   2   5   33.15   17.04
  -7  -2  -5   65.60   25.72
  -7   2  -5   21.18   16.75
   0 -21   3    1.86   15.84
   6 -14  -4   73.45   24.29
  -6 -14   4   20.49   16.49
  -6  14  -4   56.93   25.82
  -6  14   4   88.21   30.98
  -6 -14  -4    8.90   11.80
   6  14  -4   48.53   23.59
  -1  -3  -6    4.89   12.19
  -1   3  -6    3.48    9.92
   1  -3   6   41.46   22.99
  -1   3   6   22.17   21.70
   1   3   6   25.43   18.93
 -10 -14   1   44.81   20.54
 -10  14   1   67.35   26.14
  10  14  -1   88.48   26.62
  10 -14  -1   48.44   24.71
 -10 -14  -1   97.72   26.78
 -10  14  -1   20.04   21.56
 -12   7   0   -3.93   14.08
   2   0   6   -0.28   14.36
  -2   0   6   18.55   22.20
  -2   0  -6   15.34   14.93
   1 -21  -3   23.69   18.49
   1 -21   3   52.12   29.64
   1  21  -3   -5.31   12.70
  -1 -21   3   10.73   16.06
   2  -1   6  -17.09   21.80
  -2  -1   6  -12.96   16.75
  -2   1   6   36.80   25.85
  -2   1  -6   -3.89   11.38
   2   1   6   13.60   19.13
  -2  -1  -6   28.01   18.06
   0   4   6  -16.73   17.59
   0   4  -6   19.90   18.04
 -11 -11  -1  -15.94   16.39
  11 -11  -1   18.43   15.93
 -11  11   1   -4.60   19.85
 -11  11  -1    4.93   16.11
  11  11  -1   28.97   20.62
   4  23   0    6.83   13.17
  -4 -23   0  -11.22   12.79
   4 -23   0  -20.09   20.10
  12   6  -1  -10.59   13.39
 -12   6  -1    3.40   12.52
  12  -6  -1  -13.54   14.85
 -12   6   1   18.86   16.10
   7   3   5   11.27   12.26
  -7  -3  -5   45.67   22.16
  -7   3   5   31.17   26.37
  -7   3  -5   20.59   13.94
   7  -3   5   27.39   18.73
  -9 -12  -3   36.42   16.42
   9 -12  -3    3.22   10.95
   9 -12   3   38.69   30.58
  -9  12   3    6.69   18.75
   9  12  -3    4.18   11.74
   5 -10   5    1.09   12.40
  -5  10  -5   12.61   15.53
  -5 -10  -5   39.30   20.03
   5  10   5   -8.13   13.08
  -9 -15   2   21.12   13.45
  -9  15   2   53.11   28.35
   9 -15  -2   47.58   23.55
  -9 -15  -2   35.22   17.62
   9  15  -2   48.30   22.72
   2   2   6  -17.64   17.19
  -2   2   6   19.55   19.49
  -2   2  -6  -17.82   14.35
  -2  -2  -6    2.88    9.23
   2  -2   6   26.80   19.72
  -2  24   0   13.63   16.86
   2  24   0  -32.92   20.63
  -9  17   0   33.23   23.45
   9  17   0   38.24   14.14
   9 -17   0   38.21   20.12
  -9 -17   0   24.46   15.71
   6 -21   1   49.72   29.48
  -6 -21   1   -3.43   12.40
   6  21  -1   22.66   14.19
   6 -21  -1   60.38   25.77
  -6 -21  -1   32.40   21.46
   6  21   1   28.23   17.93
   8  17  -2   32.82   16.63
  -8 -17   2   18.81   13.94
  -8 -17  -2   33.22   15.75
   8 -17  -2   81.40   28.21
  -8  17   2   58.90   32.60
   1  -4   6    6.66   11.73
   1   4  -6   31.49   16.57
  -1   4  -6   -0.23   12.12
   1   4   6   22.09   23.28
  -1   4   6  -16.99   23.04
   0  24   1   31.85   21.23
   0  24  -1   38.74   25.89
  -9  -6  -4   18.30   14.16
  -9   6  -4  -31.85   16.39
   9   6  -4   -7.19   16.03
   9  -6   4  -17.43   16.99
   9   6   4    6.10    8.66
   9  -6  -4  -10.90   11.01
   0  23  -2    0.04   14.97
   0 -23   2   -6.55   14.61
  -8 -10  -4    4.31    8.42
  -8  10   4   -7.26   23.35
   8 -10   4   50.37   31.87
   8 -10  -4    5.20    9.82
   8  10  -4  -15.98   18.86
   5 -22  -1   34.74   22.10
   5  22   1   20.88   14.30
  -5 -22   1   39.34   18.96
  -5 -22  -1   58.45   23.46
   5  22  -1   41.52   17.81
   2 -18   4    2.68   15.36
  -2  18   4   18.47   23.45
  -2 -18   4   53.70   28.18
   0  14   5  -28.35   27.95
  11   0   3   25.03   19.30
  11   0  -3   72.54   33.21
  11   1   3   67.96   23.99
  11  -1  -3  126.53   34.86
  11   1  -3  119.37   35.27
  11  -1   3   69.41   25.32
 -11 -12   0  109.91   28.66
 -11  12   0   88.39   33.45
  -6   8  -5   21.96   19.85
   6  -8   5  -10.11   16.65
  -6  -8  -5   32.97   18.62
   6   8   5   15.77   14.38
   1  24  -1   54.52   24.01
  -1  24  -1   33.87   22.43
   1  24   1   32.94   23.19
 -11  -9  -2    9.83   12.58
  11   9  -2   -9.12   12.13
 -11   9   2    6.63   17.03
   2  -3   6   -2.69   11.52
  -2  -3  -6   46.91   21.33
   2   3   6   19.27   19.97
  -2   3   6   -3.44   19.37
  -2   3  -6   21.21   18.34
  -7   4   5   67.78   35.99
  -7  -4  -5   88.05   29.33
   7  -4   5   40.70   20.74
  -7   4  -5   63.86   26.07
   7   4   5   40.67   20.57
  -1 -23   2    1.79   14.66
   1  23   2   -2.43   11.96
   1  23  -2    9.59   17.18
  -1  23  -2   -8.85   22.27
   1 -23  -2    7.04   14.44
  -1 -14   5   26.88   26.94
  -1  14   5    1.58   16.55
   1  14   5  -34.16   25.28
  10  -9  -3   37.37   18.24
  10  -9   3  -50.34   36.17
 -10   9   3   46.93   30.16
  10   9  -3   11.47   16.07
 -10  -9  -3   36.68   19.17
   0   5  -6  -15.73   17.49
   0   5   6   42.37   30.74
  -5  19   3   21.28   28.21
   5  19  -3  -15.89   17.01
  -5 -19  -3   15.77   19.04
   5 -19  -3  -14.18   15.80
  -5 -19   3    0.84   14.18
   5 -21  -2   -0.04   10.97
  -5 -21   2   19.73   17.04
  -5 -21  -2   12.55   12.95
  -6  20   2   68.62   31.72
   6  20  -2   34.14   17.49
   6 -20  -2   81.23   27.69
  -6 -20   2   65.93   22.95
  -6 -20  -2   76.45   25.48
 -10 -15   0    4.55   12.38
 -10  15   0    7.12   20.90
  11   2   3    7.38   13.87
  11  -2   3   40.19   21.19
  11   2  -3   58.36   30.47
 -11  -2  -3   31.15   20.19
  11  -2  -3   87.19   32.50
   7 -20  -1   51.02   23.52
   7  20  -1    1.35   11.97
  -7 -20   1   54.09   20.96
  -7 -20  -1   59.52   22.96
  -2 -21   3   11.05   19.31
   2  21  -3  -12.56   13.88
   2 -21   3   -4.07   19.20
   2 -21  -3    0.49   11.61
   8  19   0   19.52   12.06
  -8 -19   0   55.17   19.51
  -8  19   0    6.38   19.78
   8 -19   0   67.41   30.70
  -3 -13   5  -28.28   26.84
   3  13   5   19.57   20.16
  -3  13  -5   20.93   18.50
  -3  13   5   13.41   18.51
  12   0  -2   51.69   25.56
  12   0   2   69.76   26.69
  -1   5   6    1.20   23.47
   1   5  -6   28.35   18.36
  -1   5  -6   -1.07   11.72
   1   5   6  -12.16   16.67
  -4 -12   5   36.41   27.43
  -4  12  -5   -1.31   13.54
  -4  12   5   -3.22   22.90
   4  12   5    4.38   15.43
 -12   8   0   16.89   16.82
  -6 -18  -3  -13.58   14.47
  -6  18   3   43.12   30.68
  -6 -18   3   -6.11   11.89
   6  18  -3  -11.66   15.54
   6 -18  -3   -4.65   12.67
  12  -1   2   23.93   14.79
  12   1  -2   43.21   25.72
  12  -1  -2   69.39   27.85
 -12   7  -1   35.03   25.47
  12   7  -1   27.82   21.38
  12  -7  -1   -3.44   12.31
 -12   7   1    3.79   13.63
   4  20  -3   33.18   18.63
  -4 -20   3   70.69   29.54
   4 -20  -3   14.99   14.35
  -4 -17   4    5.82   14.33
  -4  17   4   19.91   27.51
  -2   4  -6   24.24   18.49
  -2   4   6    8.26   20.21
   2   4   6   11.43   20.14
   2  -4   6   25.61   17.13
  -2  -4  -6   19.11   16.03
  11  -3  -3   78.75   31.21
 -11  -3  -3   65.41   25.68
  11   3  -3   52.04   25.49
  11   3   3   21.51   15.35
  11  -3   3   30.80   17.31
   5 -16  -4   46.01   24.31
  -5 -16   4   42.69   26.36
  -5 -16  -4   50.33   24.46
  -5  16   4    9.29   17.46
   5  16  -4   36.58   21.89
  -4 -23   1  -11.52   16.77
   4 -23  -1   14.48   20.82
  -4 -23  -1   13.85   11.24
   4  23  -1   10.77   15.01
   4  23   1  -40.88   22.37
  12   2  -2    9.49   17.64
  12  -2  -2   23.97   21.15
  12  -2   2    2.13   13.76
   7  -5   5   21.99   15.69
   7   5   5   36.55   21.34
  -7  -5  -5   55.94   23.60
  -7   5  -5   63.80   23.37
   9  -7  -4    4.64    9.45
   9  -7   4   13.90   15.94
  -9  -7  -4    1.96    9.28
  -9   7   4    5.20   20.52
 -10 -13  -2   14.00   13.91
 -10  13   2   12.73   15.29
  10  13  -2   28.04   16.34
  10 -13  -2   31.36   21.09
  -3   0  -6   10.49   14.50
   3   0   6    4.93   15.46
  -7  13   4   22.05   27.17
   7 -13   4   37.81   32.01
  -7 -13  -4    1.55    9.97
   7 -13  -4   33.03   21.10
  -7 -13   4  -26.60   25.17
   7  13  -4   56.18   27.72
   3   1   6   22.99   18.05
  -3   1  -6   20.68   18.24
  -3  -1  -6   36.59   20.67
   3  -1   6    5.66   13.66
  -3   1   6   58.18   32.63
  -8  15   3  -33.95   27.36
   8 -15   3   62.35   44.28
   8 -15  -3  -13.19   11.54
  -8 -15   3   15.97   16.08
  -8 -15  -3   -6.59   11.73
   8  15  -3    4.43   15.33
   2 -24  -1   31.38   17.82
   2  24  -1   77.50   25.52
  -2  24  -1   81.17   31.78
   2  24   1   90.28   31.89
  -2 -24   1   85.78   23.71
   9  17  -1   -4.69   13.96
  -9 -17   1   31.34   16.59
  -9  17  -1   27.75   20.94
   9 -17  -1    5.49   14.85
  -9  17   1   26.98   21.12
  -4 -22   2   13.29   13.05
   4 -22  -2   35.84   19.79
   4  22  -2   19.02   14.12
  -7 -19   2    5.68    9.89
  -7  19   2   -3.26   21.03
  -7 -19  -2    8.67   13.21
   7 -19  -2   -8.46   15.48
   7  19  -2   18.53   13.99
  -2 -23   2   40.26   21.95
   2 -23  -2   10.70   16.64
   2  23  -2    7.73   15.69
   2  23   2    4.01   12.26
   0   6   6  -20.60   17.88
   0   6  -6   16.97   15.52
  -2 -14   5   85.81   38.48
   2  14   5   15.12   15.15
  -2  14  -5   34.85   22.39
  -2  14   5   67.57   37.16
  -3   2   6   19.54   24.16
   3   2   6   25.86   19.80
  -3   2  -6   23.17   16.30
  -3  -2  -6   55.28   23.15
   3  -2   6   24.33   19.87
   3  24   0  -16.87   14.68
  12  -3  -2   14.06   11.84
  12   3  -2    5.06   12.99
  12  -3   2   34.63   24.53
 -11  -4  -3   47.47   24.31
  11   4  -3   29.45   21.73
  11  -4   3   25.90   21.54
  11  -4  -3   39.83   23.85
 -11  12  -1   55.64   29.16
 -11 -12  -1   79.62   25.90
 -11  12   1   38.39   25.43
  11  12  -1   45.52   23.91
  11 -12  -1   36.68   20.63
  -5  11   5  -10.98   27.36
  -5  11  -5   34.47   22.42
  -5 -11  -5  -33.63   22.98
   5  11   5  -25.34   24.37
  -1   6  -6   18.10   13.39
  -1   6   6   52.60   27.81
   1   6   6   62.90   29.40
   1   6  -6   16.78   15.14
  -3 -18   4    4.17   18.29
  -3  18   4  -24.67   25.98
   3 -18   4   20.42   15.69
   2   5   6   -5.44   14.51
  -2   5   6    6.53   21.71
  -2   5  -6   32.89   19.89
  -6   9  -5   44.10   24.27
   6   9   5   12.85   14.76
   6  -9   5    5.78   14.20
  -6  -9  -5   64.37   24.75
   6  15  -4   -5.08   20.11
  -6 -15  -4   32.56   20.99
   6 -15  -4  -34.52   22.60
  -6  15   4   13.60   17.01
  -6 -15   4   21.82   21.16
 -10 -15   1   30.57   19.40
 -10  15   1   18.89   18.58
  10 -15  -1   72.30   31.85
 -10  15  -1  -13.75   14.91
 -10 -15  -1   16.98   14.57
  10  15  -1   44.77   21.34
   8  11  -4   16.19   14.44
   8 -11  -4   24.03   19.10
  -8 -11  -4    8.06   11.18
   8 -11   4   83.37   42.78
  -8  11   4  -36.35   30.27
  -9  13   3   30.01   23.28
   9 -13  -3   25.08   17.29
   9  13  -3   40.01   24.00
  -9 -13  -3  -12.16   12.11
   9 -13   3  -19.63   32.68
  -3   3  -6   25.20   14.83
   3   3   6   45.90   23.76
  -3  -3  -6   22.56   13.99
   3  -3   6   27.78   17.21
  -3   3   6   21.67   20.89
  -7 -17   3   32.21   20.16
   7  17  -3   -4.83   13.84
   7 -17  -3  -16.48   15.28
  -7  17   3    7.65   19.08
  -7 -17  -3    0.08   12.47
 -11 -10  -2   26.96   18.57
 -11  10   2   19.19   21.99
  11 -10  -2    5.34   11.97
  11  10  -2    0.04   13.19
   0 -19   4  -25.53   20.40
  -8 -19  -1   18.24   14.33
   8  19  -1    5.20    8.50
  -8  19   1   13.90   16.94
   8 -19  -1   11.42   17.73
  -8 -19   1   27.62   15.18
  10  10  -3   31.81   21.59
  10 -10   3   57.91   24.08
 -10 -10  -3   25.78   13.66
  10 -10  -3   43.14   22.53
 -10  10   3  107.86   37.21
  -7  -6  -5   24.95   17.76
   7   6   5    4.06    9.93
  -7   6  -5   38.89   19.32
   7  -6   5   20.19   20.92
  -7   6   5   31.16   33.08
  12  -4   2   12.49   17.63
  12  -4  -2    2.53   13.51
  12   4  -2   10.20   14.23
 -12   8   1   17.14   18.70
 -12   8  -1   53.66   29.24
  -3 -21   3   11.14   15.96
   3  21  -3   20.02   17.57
   3 -21  -3   15.96   15.86
 -12   9   0   20.93   19.02
  -6 -22   0   -6.18   12.00
   6 -22   0   31.65   21.67
   6  22   0   31.67   16.96
  -1 -19   4   41.17   28.52
   1 -19   4   32.67   28.73
  11  -5   3   65.30   28.95
  11   5  -3   58.14   24.87
  11  -5  -3   42.28   21.93
 -11  -5  -3   78.55   26.45
 -11  13   0   -7.14   21.27
 -11 -13   0  -13.53   10.34
   9  -8   4   40.36   36.84
  -9   8   4    7.53   21.85
   9  -8  -4    2.34   10.84
  -9  -8  -4   33.73   17.75
   9   8  -4   16.62   15.44
   0   7  -6   -5.27   13.27
   0   7   6  -35.91   30.63
  -3  -4  -6   31.14   18.53
   3   4   6   -2.20   12.98
  -3   4  -6   37.70   21.25
  -3   4   6   17.47   31.51
   3  -4   6   21.43   22.57
  -9 -16  -2   62.61   22.75
  -9 -16   2   37.24   19.80
   9  16  -2   77.43   27.83
   9 -16  -2   58.15   26.79
  -9  16   2   50.44   27.87
   0 -15   5   28.60   21.56
   0  15   5    2.17   23.43
   5 -23   0    3.66   19.70
  -5 -23   0   -0.37   10.50
   5  23   0   24.78   15.93
  -2   6  -6   38.57   22.23
   2   6   6  -32.08   26.68
  -2   6   6  -11.93   18.77
   7 -21   0   58.58   28.71
   7  21   0   -3.35   10.63
  -7 -21   0   58.12   22.92
  -1   7   6   54.90   34.49
  -1   7  -6  -12.77   17.64
   1   7  -6   17.65   16.58
   1   7   6   10.50   15.48
   0  25   0   25.59   20.45
   3 -24  -1  -18.07   20.52
   3  24   1    6.67   14.96
  -3 -24   1   29.74   20.91
  -3  24  -1   17.89   18.78
   3  24  -1    5.25   13.90
  12   5  -2    4.28   17.51
  12  -5  -2    4.94   17.71
  12  -5   2    0.73   17.17
  -4 -13   5  -45.05   28.62
  -4  13   5  -22.63   18.48
  -4  13  -5   23.74   22.11
   1  15   5   42.42   31.23
  -1 -15   5  -12.19   18.04
  -1  15   5   53.96   32.28
  -9  18   0   23.35   25.18
  -9 -18   0   14.96   16.60
   3  23  -2  -13.01   15.11
  -3 -23   2   -3.53   11.68
   3 -23  -2   20.94   16.97
   8 -18  -2   24.67   18.36
  -8 -18   2   20.94   14.71
  -8 -18  -2   25.29   16.63
   8  18  -2    8.75   10.84
  -8  18   2   44.73   36.33
  -3  14  -5  -19.53   19.11
  -3 -14   5   37.16   29.18
  -3  14   5  -10.45   17.86
   0 -22   3   -6.41   17.33
 -10   0  -4   44.73   20.74
  10   0  -4  -19.92   15.98
  10   0   4   14.90   14.44
  10   1  -4   -7.39   22.39
  10  -1   4   15.57   12.69
 -10  -1  -4   38.41   20.58
  10   1   4   37.07   18.89
  10  -1  -4   10.64   11.97
 -10   1  -4   66.05   28.36
   1  25   0  -15.86   19.36
  -1  25   0    0.94   13.29
 -10  16   0    5.81   18.93
 -10 -16   0   10.47   12.14
   7   7   5   12.98   13.46
   7  -7   5   30.56   28.07
  -7   7  -5   36.96   24.06
  -7   7   5  -24.48   26.21
  -7  -7  -5  -10.90   13.27
   2 -19   4   32.69   25.48
  -2 -19   4   -0.09   19.12
  11  -6   3   41.39   26.93
  11  -6  -3   13.99   14.14
 -11  -6  -3   21.91   15.02
  11   6  -3   10.96   18.29
  -3   5   6   29.86   19.65
  -3   5  -6  -27.56   18.73
   3   5   6   -9.42   18.58
  -1 -22   3   37.08   28.79
  10   2  -4  -49.56   23.71
  10  -2   4   11.46   13.80
  10  -2  -4  -39.18   20.42
 -10  -2  -4    2.32   10.89
  10   2   4   15.25   16.39
  -6 -10  -5    6.04   15.77
  -6  10  -5   22.99   18.94
  -6  10   5  -50.11   36.79
   4   0   6   18.42   14.58
  -4   0  -6    9.94   11.05
  10 -14  -2  -24.52   21.10
  10  14  -2   -1.12   11.18
 -10 -14  -2    4.09   10.09
 -10  14   2  -23.80   24.39
   4   1   6   -9.67   15.20
   4  -1   6   44.89   24.87
  -4   1  -6   27.56   18.43
  -4  -1  -6   24.97   17.70
  -7  14   4  -12.62   30.68
  -7 -14  -4   -8.23   11.44
   7 -14  -4   37.60   19.15
   7  14  -4   24.76   20.88
 -12   9   1   18.82   17.12
 -12   9  -1   24.37   20.04
   6  22  -1   -4.30    9.08
  -6 -22   1  -16.58   14.12
  -6 -22  -1   -0.71   10.00
   6 -22  -1   -3.17   14.20
  -5  12   5   18.64   18.58
  -5  12  -5   45.74   23.45
   4   2   6   26.53   18.94
  -4  -2  -6   18.61   16.70
  -4   2  -6  -32.35   19.38
   4  -2   6   16.52   21.99
   4 -24   0   46.17   30.64
   4  24   0    5.54    9.79
  11  11  -2  -15.35   19.75
 -11 -11  -2    0.16   11.59
  11 -11  -2    6.52   15.44
 -11  11   2  -22.82   23.52
  -2   7   6   -9.05   21.23
   2   7   6  -19.35   22.95
  -2   7  -6   -9.16   15.02
  -8   0  -5   33.69   19.75
   8   0   5   20.95   22.63
   0   8  -6   57.05   28.12
   0   8   6   18.44   23.40
 -11  13  -1   12.66   23.07
 -11 -13  -1   -5.69   12.11
 -11  13   1    4.11   21.24
  10   3  -4    9.68   13.16
 -10  -3  -4   43.63   20.63
  10  -3   4   38.57   22.44
  10  -3  -4    2.59   16.54
  10   3   4   27.63   18.36
  -5 -20   3  -10.60   17.50
   5 -20  -3   11.00   11.59
   5  20  -3   29.62   19.90
  -5 -17   4   29.47   22.89
  -5  17   4   23.11   24.61
  12  -6  -2   22.72   21.34
  12   6  -2   18.10   17.80
  12  -6   2   -8.85   17.57
   8  -1   5   13.27   14.12
   8   1   5   41.46   20.18
  -8   1  -5   26.43   14.60
  -8  -1  -5   52.79   21.58
   8  12  -4  -14.84   18.05
  -8  12   4    4.60   19.79
   8 -12  -4  -10.70   13.94
  -8 -12  -4   -2.32   11.64
   8 -12   4   71.63   41.88
  10 -11  -3   14.77   17.21
 -10 -11  -3   11.42   14.73
  10  11  -3   17.52   19.38
 -10  11   3  -34.47   30.38
  10 -11   3   76.28   42.54
 -12  10   0   98.16   38.55
  -2  15  -5  -12.19   18.35
  -2 -15   5   19.11   28.83
  -2  15   5   -4.24   25.66
  -9  -9  -4  -17.21   13.24
   9  -9   4   37.47   32.41
  -9   9   4   47.39   34.62
   9  -9  -4   33.99   19.87
   9   9  -4   10.82   14.18
  -8 -16  -3   -7.31   13.00
   8 -16  -3   -1.00   13.65
  -8  16   3   12.52   32.31
  -8 -16   3  -25.92   20.96
   8  16  -3   12.60   13.39
  -4 -18   4    2.82   15.73
  -4  18   4   24.99   26.57
   5 -23  -1   53.52   26.33
  -5 -23   1    5.93   10.36
   5  23  -1   22.14   15.93
  -6  19   3   12.28   21.65
   6 -19  -3   11.52   12.15
   6  19  -3   32.62   18.17
  -6 -19   3   -1.00   12.32
  -8 -20   0    9.10   11.27
   6  21  -2  -19.57   15.33
  -6 -21   2    4.79   14.82
  -6 -21  -2  -16.37   17.30
   6 -21  -2    2.14   11.04
   0  24  -2   42.81   22.83
   7 -21  -1   20.76   21.24
  -7 -21  -1   19.92   18.83
   7  21  -1   15.13   15.38
  -7 -21   1   -0.31   10.11
   1   8  -6    5.65   16.29
  -1   8   6   51.84   37.67
   1   8   6   42.99   26.54
  -1   8  -6   22.96   17.25
  -8  -2  -5   43.12   19.50
  -8   2  -5   35.01   22.55
   8  -2   5  -14.40   18.34
   8   2   5   33.49   23.31
   2  25   0   25.26   17.83
  -2  25   0   -3.41   21.84
  -4   3  -6   -5.91   16.22
   4  -3   6   22.29   20.18
   4   3   6   34.14   23.93
  -4  -3  -6   16.99   14.19
   5 -22  -2   58.49   26.57
  -5 -22   2   23.26   16.82
   5  22  -2   33.09   21.49
   0  25  -1   -1.02   16.21
   0  25   1   -6.74   17.07
  -9 -14  -3    5.13   10.10
  -9  14   3   26.51   28.56
   9 -14   3    2.49   29.16
   9  14  -3   -8.64   18.74
   9 -14  -3   28.66   17.78
  -3   6  -6    5.57   12.79
  -3   6   6   47.57   32.04
   3   6   6    9.67   19.42
  -2 -22   3   69.19   31.10
  -9  18   1    4.20   21.29
  -9 -18   1   15.86   11.75
   9  18  -1    6.28   13.95
   9 -18  -1   17.47   16.75
  -9 -18  -1    2.82    9.77
  10  -4   4    1.18   12.86
 -10  -4  -4   33.97   17.56
  10   4  -4   26.04   18.62
  10  -4  -4   19.58   13.92
   1  24  -2  -21.85   16.28
   1 -24  -2  -17.71   15.58
 -11  -7  -3  -15.48   16.06
  11  -7   3  -14.54   25.05
  11  -7  -3    0.33   13.54
  11   7  -3   31.35   22.66
   4 -21  -3   17.28   14.54
   4  21  -3    3.86   13.81
  -4 -21   3   34.45   20.71
  -7   8   5   55.34   36.92
  -7  -8  -5    7.77   14.04
   7  -8   5   56.87   30.56
  -7   8  -5   -7.86   12.33
  -6  16   4   44.49   27.70
  -6 -16   4   -9.75   15.00
  -1  25  -1    8.28   18.24
   1  25  -1   -2.56   13.27
   1  25   1   -4.26   17.54
 -10 -16   1    3.93   10.84
 -10  16  -1   -7.08   17.16
  10 -16  -1   46.85   27.45
 -10  16   1    2.00   19.31
 -10 -16  -1   39.08   21.45
  10  16  -1   17.05   14.86
  -8   3  -5   43.24   22.52
   8  -3   5   38.40   25.53
   8   3   5   23.06   18.22
  -8  -3  -5   48.60   20.94
  -7 -20   2   44.13   22.61
  -7 -20  -2   23.50   17.87
   7 -20  -2   -3.30   12.67
   7  20  -2   13.74   14.90
 -11  14   0    1.77   19.68
   4   4   6   18.14   18.80
  -4   4  -6   13.35   19.35
  -4  -4  -6   40.89   22.12
  -3 -19   4   16.22   19.82
  12   7  -2  -20.03   22.39
  12  -7   2   36.63   24.30
  12  -7  -2   -7.22   13.24
   7  18  -3    6.93   16.61
   7 -18  -3   19.20   14.44
  -7 -18  -3  -16.33   14.79
  -7  18   3   25.25   27.46
  -7 -18   3   -2.05   13.41
   2   8   6   28.21   20.57
  -2   8   6  -46.17   33.59
  -2   8  -6  -10.99   16.73
   4  24  -1   21.57   16.27
   4 -24  -1   25.96   21.34
  -4 -24   1    0.18   10.73
   8   4   5   16.23   18.12
  -8  -4  -5    0.09   13.05
  -8   4  -5   25.90   18.91
   8  -4   5   -4.82   13.51
  10  -5   4   20.98   22.99
  10   5  -4   29.21   16.08
 -10  -5  -4   20.84   16.84
  10  -5  -4   14.66   13.68
  -4 -23   2   17.63   17.57
   4  23  -2   15.50   16.41
   4 -23  -2   48.19   21.41
  -6 -11  -5   -5.97   11.59
  -6  11   5   -0.68   22.66
  -6  11  -5   31.66   23.39
  -4  14  -5   23.62   15.67
  -4  14   5   11.94   23.04
  -4 -14   5   22.12   19.44
 -12  10   1   54.37   28.39
 -12  10  -1   10.99   19.99
   0   9   6    9.50   22.27
   0   9  -6  -19.72   17.61
   0 -16   5    5.14   17.85
   0 -20   4  -26.22   30.48
   2  24  -2   -4.22   13.46
   2 -24  -2   16.17   20.10
   3   7   6   27.81   23.19
  -3   7  -6   34.58   23.24
  -3   7   6   65.69   33.75
  -8 -20   1   16.85   12.34
   8  20  -1   -0.90    9.42
  -8 -20  -1    7.84   13.03
   8 -20  -1  -12.91   16.30
  -9 -17   2    2.75   12.17
   9 -17  -2   12.14   18.45
  -9 -17  -2   -3.01    9.99
   9  17  -2   10.51   14.85
  -9  17   2   11.17   21.76
  -3  15  -5    6.92   17.73
  -3 -15   5    0.06   22.56
  -3  15   5    2.83   19.75
   2  25  -1   35.68   23.36
   2  25   1    2.47   14.85
   2 -25  -1   23.17   20.85
  -2  25  -1  -29.61   21.83
  -9  10   4  -12.89   20.64
   9 -10   4   29.19   35.29
  -9 -10  -4   15.30   15.48
   9  10  -4   -4.38   13.31
   9 -10  -4   -1.61   10.12
   4   5   6   14.09   20.05
  -4   5  -6   83.89   30.31
   1   9  -6   10.21   15.20
   1   9   6    7.23   17.20
  -1   9   6   15.05   19.63
  -1   9  -6   21.24   23.22
  -1 -16   5   26.16   31.81
   1 -16   5   82.84   37.29
  -1 -20   4   32.14   28.57
   1 -20   4    9.62   17.38
 -12  11   0   16.09   24.27
  11  -8  -3   37.61   23.37
  11   8  -3   14.76   18.04
 -11  -8  -3   13.95   14.30
  11  -8   3   40.04   26.88
   3  25   0   20.72   17.55
  11 -12  -2   15.54   17.01
  11  12  -2   13.02   14.63
 -11  12   2   58.31   29.98
 -11 -12  -2   32.55   14.25
  -5  13   5   30.57   23.75
  10 -12   3  -19.24   27.40
  10  12  -3   19.44   20.61
 -10  12   3   14.43   30.10
  10 -12  -3   38.06   24.50
 -10 -12  -3   16.04   13.41
  -3 -22   3    4.75   14.46
  -8   5  -5    9.13   12.78
   8  -5   5    2.97   17.62
  -8  -5  -5   10.02   13.92
  -7   9   5   31.86   33.93
  -7  -9  -5   26.52   16.65
  10 -15  -2   13.38   15.67
 -10 -15  -2   31.80   21.00
 -10  15   2   24.32   30.64
  10  15  -2  -10.80   15.77
  -8 -13  -4   20.71   15.55
  -8  13   4   28.33   31.74
 -10 -17   0    2.85   10.59
  -7  15   4   82.40   42.01
  -7 -15  -4   -4.21   11.25
  -9 -19   0   -1.83   12.26
 -11  14   1  -10.38   19.38
 -11  14  -1   -1.63   19.31
  10  -6  -4   25.95   19.93
 -10  -6  -4   -8.17   10.65
  10   6  -4   -4.72   13.94
  10  -6   4   32.32   20.77
  -8 -19  -2   19.92   18.49
  -8 -19   2   -7.55    9.78
   8  19  -2   24.96   16.37
   8 -19  -2   27.10   17.83
  -6 -23   0    7.05   13.96
  12  -8  -2   12.08   18.08
  12  -8   2    8.80   23.57
  -5   0  -6   24.89   18.00
   5   0   6   15.36   17.96
  -5  -1  -6    8.56   15.02
  -5   1  -6    7.38   10.52
   5   1   6   11.60   12.96
   5  -1   6    9.80   18.86
  -7 -22   0   20.71   17.77
   4   6   6   18.71   19.24
  -4   6  -6   56.33   26.28
   2   9   6  -22.30   25.23
  -2   9   6   73.83   37.02
  -2   9  -6  -31.21   24.50
  -2 -16   5   -9.51   20.46
  -2 -20   4  -18.65   23.14
  -5   2  -6   23.80   17.87
  -5  -2  -6  -12.92   15.41
   5   2   6   35.13   25.19
   5  -2   6    2.08   15.02
   5 -24   0   60.17   33.57
  -3   8   6   52.31   36.24
   3   8   6    0.53   21.54
  -3   8  -6   54.84   27.71
  -9 -15  -3   20.47   15.95
   9 -15  -3   17.63   18.68
  -9  15   3   43.06   35.88
   9  15  -3   21.49   18.31
   8 -17  -3   21.87   17.76
  -8  17   3   22.70   24.27
  -8 -17  -3   32.60   18.26
   8  17  -3   18.17   16.01
  -5 -18   4   23.98   22.55
   8  -6   5   -3.46   14.83
  -8  -6  -5   -5.67   12.05
   0  10   6   -0.20   20.37
   0  10  -6   59.64   26.45
   3  24  -2   35.71   22.76
 -12  11  -1  -13.05   19.48
 -12  11   1   14.78   20.25
  -5   3  -6   37.84   20.68
   5   3   6   16.53   21.70
   3  25  -1   10.34   17.12
   3 -25  -1  -21.57   21.51
  -4 -19   4  -14.25   23.26
  11  -9  -3   33.80   18.91
  11   9  -3   49.48   24.97
  11  -9   3   67.67   33.81
  -6  12   5   33.44   27.56
  -1  10  -6   -9.84   13.29
  -1  10   6   31.23   29.12
   1  10   6   52.63   34.62
   0  26   0   47.35   27.34
 -10  -7  -4    6.98   10.17
  10  -7  -4   -5.67   13.22
  10   7  -4   10.67   12.90
  10  -7   4    9.86   23.88
 -11  15   0   12.96   21.78
  -5 -21   3   48.78   23.14
  -6 -20   3   15.52   18.53
  -9  11   4   46.48   31.86
  -9 -11  -4   18.55   14.78
 -10 -17  -1   40.92   21.37
  -9 -19  -1    7.73   19.00
  -9 -19   1   13.05   15.21
   6  23  -1    1.90   11.64
   6 -23  -1  -20.71   19.77
  -6 -23   1   -2.58   10.44
  -8 -21   0   31.16   19.51
  -1  26   0   15.05   17.85
   1  26   0   31.69   22.62
  12   0  -3   -4.29   15.23
  -4   7  -6    6.65   13.78
   4   7   6   40.78   26.97
  12   1  -3   21.43   15.69
  12  -1  -3   15.44   20.10
 -12  12   0   45.22   30.82
  -5   4  -6   35.89   20.57
   5   4   6   -6.09   17.18
  12  -9   2   21.33   21.70
   6 -22  -2  -22.92   21.82
  -6 -22   2   12.68   14.99
   6  22  -2  -10.49   14.56
  -4  15   5  -25.63   22.31
  -7 -22   1   -1.38   10.04
 -11  13   2   22.68   26.73
  12   2  -3   38.53   25.04
  12  -2  -3   61.02   27.30
  -8  -7  -5    0.88   11.39
  10 -13  -3   10.34   16.67
 -10 -13  -3   24.49   16.30
 -10  13   3   38.73   35.59
  10  13  -3   -4.78   15.59
   5  24  -1   19.34   16.73
   5 -24  -1   19.29   17.66
   5  23  -2   -3.35   15.50
  -5 -23   2  -13.65   15.67
   0 -17   5   29.53   22.84
  -5  14   5   49.87   43.87
  -3   9  -6   35.35   23.21
  -4 -22   3   50.80   27.31
  -2  10  -6   12.20   14.05
  -2  10   6   34.44   34.06
   7  21  -2   14.77   11.49
   7 -21  -2   -3.95   14.88
  -7 -21   2   12.23   14.82
  -3 -20   4   27.89   28.92
  -8  14   4   31.83   27.72
  -9 -18  -2  -31.28   18.25
  -1 -17   5   13.85   25.22
  -5   5  -6   60.32   25.13
   0   0   0    0.00    0.00

_computing_structure_solution     'SHELXT 2018/2 (Sheldrick, 2018)'
;

_shelx_hkl_checksum    2666

#==============================================================================
#     End of CIF
#==============================================================================
